# Supplementary material for: Gene expression plasticity followed by genetic change during colonization in a high-elevation environment
Source: eLife. 2024 Mar 12;12:RP86687. doi: 10.7554/eLife.86687 (PMC10932543; doi:10.7554/eLife.86687)
Supplement: Figure 2—source data 1. [file elife-86687-fig2-data1.xlsx]

## Sheet: Figure 2B
Genes	P	R	group	group1
PMO000025	0.702055	-0.129823	FALSE	brown
PMO000027	0.0273103	0.45088	TRUE	brown
PMO000065	0.191568	0.153423	FALSE	brown
PMO000088	0.0213695	0.480012	TRUE	brown
PMO000098	0.0714373	0.320066	FALSE	brown
PMO000107	0.0585731	0.349413	FALSE	brown
PMO000108	0.0148337	0.52053	TRUE	brown
PMO000124	0.167934	0.177836	FALSE	brown
PMO000163	0.115295	0.243754	FALSE	brown
PMO000189	0.0544345	0.359921	FALSE	brown
PMO000196	0.0809758	0.300863	FALSE	brown
PMO000206	0.00624003	0.604459	TRUE	brown
PMO000211	0.0661748	0.33153	FALSE	brown
PMO000217	0.437047	-0.0168749	FALSE	brown
PMO000245	0.036179	0.415469	TRUE	brown
PMO000274	0.185122	0.159838	FALSE	brown
PMO000301	0.125186	0.229794	FALSE	brown
PMO000324	0.147458	0.201252	FALSE	brown
PMO000377	0.0711906	0.320588	FALSE	brown
PMO000382	0.0593966	0.347392	FALSE	brown
PMO000453	0.12128	0.2352	FALSE	brown
PMO000456	0.102251	0.263663	FALSE	brown
PMO000501	0.186388	0.158565	FALSE	brown
PMO000520	0.00152618	0.710742	TRUE	brown
PMO000525	0.0805488	0.301684	FALSE	brown
PMO000632	0.311559	0.0568008	FALSE	brown
PMO000677	0.117752	0.240201	FALSE	brown
PMO000685	2.3538e-05	0.88554	TRUE	brown
PMO000705	0.095125	0.27539	FALSE	brown
PMO000711	0.287053	0.0738158	FALSE	brown
PMO000748	0.00722263	0.591394	TRUE	brown
PMO000753	0.260776	0.0933665	FALSE	brown
PMO000756	0.239164	0.11063	FALSE	brown
PMO000790	0.356967	0.0278478	FALSE	brown
PMO000823	0.0199707	0.487776	TRUE	brown
PMO000846	0.099839	0.267559	FALSE	brown
PMO000873	0.0805449	0.301691	FALSE	brown
PMO000965	0.0370789	0.412269	TRUE	brown
PMO000991	0.00472487	0.628167	TRUE	brown
PMO001011	0.330711	0.0442132	FALSE	brown
PMO001014	0.14507	0.204145	FALSE	brown
PMO001036	0.00711301	0.59278	TRUE	brown
PMO001114	0.0066731	0.598517	TRUE	brown
PMO001181	0.123103	0.23266	FALSE	brown
PMO001199	0.0937628	0.277708	FALSE	brown
PMO001220	0.313053	0.055797	FALSE	brown
PMO001401	0.0400721	0.402042	TRUE	brown
PMO001452	0.264489	0.0905134	FALSE	brown
PMO001479	0.0930261	0.278973	FALSE	brown
PMO001492	0.00714787	0.592338	TRUE	brown
PMO001500	0.692754	-0.126479	FALSE	brown
PMO001502	0.334146	0.0420158	FALSE	brown
PMO001562	0.0291795	0.442742	TRUE	brown
PMO001578	0.31998	0.0511937	FALSE	brown
PMO001635	0.790968	-0.160162	FALSE	brown
PMO001651	0.013956	0.526985	TRUE	brown
PMO001676	0.061748	0.341737	FALSE	brown
PMO001687	0.20789	0.1379	FALSE	brown
PMO001729	0.0173989	0.503231	TRUE	brown
PMO001740	0.104291	0.260424	FALSE	brown
PMO001744	0.235013	0.114083	FALSE	brown
PMO001753	0.376739	0.0161318	FALSE	brown
PMO001755	0.0182988	0.497632	TRUE	brown
PMO002028	0.0653959	0.333287	FALSE	brown
PMO002061	0.303373	0.0623648	FALSE	brown
PMO002085	0.151721	0.196177	FALSE	brown
PMO002157	0.400887	0.00245397	FALSE	brown
PMO002189	0.280208	0.0787699	FALSE	brown
PMO002314	0.0195048	0.490456	TRUE	brown
PMO002325	0.0359888	0.416154	TRUE	brown
PMO002392	0.118602	0.238986	FALSE	brown
PMO002414	0.364221	0.0234923	FALSE	brown
PMO002431	0.0135825	0.529828	TRUE	brown
PMO002579	0.047847	0.378008	TRUE	brown
PMO002581	0.195821	0.149282	FALSE	brown
PMO002583	0.0317601	0.432148	TRUE	brown
PMO002640	0.00141274	0.715665	TRUE	brown
PMO002663	0.243771	0.106851	FALSE	brown
PMO002694	0.0127197	0.536635	TRUE	brown
PMO002708	0.0197308	0.48915	TRUE	brown
PMO002754	0.00186362	0.697613	TRUE	brown
PMO002759	0.948987	-0.208083	FALSE	brown
PMO002789	0.48875	-0.0424573	FALSE	brown
PMO002843	0.0995386	0.26805	FALSE	brown
PMO002867	0.15735	0.189643	FALSE	brown
PMO002962	0.0136711	0.529148	TRUE	brown
PMO002990	0.0432636	0.391772	TRUE	brown
PMO003000	0.0738117	0.315108	FALSE	brown
PMO003049	0.32342	0.0489368	FALSE	brown
PMO003052	0.0824386	0.298076	FALSE	brown
PMO003067	0.563869	-0.0761094	FALSE	brown
PMO003080	0.008249	0.579149	TRUE	brown
PMO003090	0.0458887	0.383758	TRUE	brown
PMO003097	0.332985	0.0427564	FALSE	brown
PMO003109	0.251092	0.100958	FALSE	brown
PMO003122	0.123569	0.232016	FALSE	brown
PMO003129	0.0095944	0.564779	TRUE	brown
PMO003215	0.0946971	0.276115	FALSE	brown
PMO003217	0.0703939	0.322285	FALSE	brown
PMO003243	0.0643391	0.335696	FALSE	brown
PMO003265	0.00182281	0.699097	TRUE	brown
PMO003274	0.0327592	0.428226	TRUE	brown
PMO003313	0.0466004	0.381647	TRUE	brown
PMO003339	0.0206974	0.483692	TRUE	brown
PMO003359	0.237268	0.112201	FALSE	brown
PMO003394	0.000129728	0.832745	TRUE	brown
PMO003432	0.0516135	0.367446	FALSE	brown
PMO003442	0.329862	0.0447589	FALSE	brown
PMO003502	0.0901881	0.283921	FALSE	brown
PMO003575	0.0262077	0.455886	TRUE	brown
PMO003584	0.306141	0.0604706	FALSE	brown
PMO003592	0.33304	0.0427213	FALSE	brown
PMO003596	0.581105	-0.0833337	FALSE	brown
PMO003695	0.010969	0.551635	TRUE	brown
PMO003751	0.0237141	0.467842	TRUE	brown
PMO003826	0.0146083	0.522159	TRUE	brown
PMO003954	0.302676	0.0628441	FALSE	brown
PMO003963	0.244171	0.106526	FALSE	brown
PMO003978	0.0464518	0.382085	TRUE	brown
PMO003992	0.0300505	0.439088	TRUE	brown
PMO004001	0.100931	0.265786	FALSE	brown
PMO004031	0.450155	-0.0235745	FALSE	brown
PMO004034	0.102874	0.262669	FALSE	brown
PMO004041	0.11778	0.240161	FALSE	brown
PMO004094	0.00394569	0.642764	TRUE	brown
PMO004112	0.215866	0.130657	FALSE	brown
PMO004168	0.0305138	0.437177	TRUE	brown
PMO004173	0.0862902	0.290917	FALSE	brown
PMO004183	0.128641	0.22512	FALSE	brown
PMO004186	0.444071	-0.020484	FALSE	brown
PMO004201	0.000624248	0.762859	TRUE	brown
PMO004212	0.0789211	0.304845	FALSE	brown
PMO004217	0.0425292	0.394082	TRUE	brown
PMO004218	0.0603193	0.345152	FALSE	brown
PMO004236	0.278701	0.0798736	FALSE	brown
PMO004254	0.00771121	0.585407	TRUE	brown
PMO004276	0.680109	-0.121877	FALSE	brown
PMO004282	4.58184e-06	0.920436	TRUE	brown
PMO004303	0.560514	-0.0746832	FALSE	brown
PMO004309	0.222048	0.125185	FALSE	brown
PMO004343	0.466941	-0.0319364	FALSE	brown
PMO004354	0.098176	0.270288	FALSE	brown
PMO004372	0.129567	0.223884	FALSE	brown
PMO004414	0.0157273	0.514257	TRUE	brown
PMO004552	0.282654	0.0769889	FALSE	brown
PMO004593	0.0243928	0.464494	TRUE	brown
PMO004643	0.184509	0.160457	FALSE	brown
PMO004644	0.19926	0.145984	FALSE	brown
PMO004649	0.0227193	0.472886	TRUE	brown
PMO004670	0.0492637	0.373962	TRUE	brown
PMO004704	0.0177859	0.500796	TRUE	brown
PMO004727	0.141007	0.209153	FALSE	brown
PMO004729	0.218098	0.128668	FALSE	brown
PMO004768	0.155415	0.191868	FALSE	brown
PMO004894	0.352487	0.0305727	FALSE	brown
PMO004906	0.184245	0.160724	FALSE	brown
PMO004948	0.0816911	0.299495	FALSE	brown
PMO004968	0.0344252	0.421888	TRUE	brown
PMO005017	0.0318362	0.431846	TRUE	brown
PMO005090	0.294381	0.0686134	FALSE	brown
PMO005118	0.0433842	0.391396	TRUE	brown
PMO005159	0.643091	-0.108011	FALSE	brown
PMO005185	0.0548337	0.358881	FALSE	brown
PMO005197	0.0356388	0.41742	TRUE	brown
PMO005209	0.126599	0.22787	FALSE	brown
PMO005217	0.00504945	0.622636	TRUE	brown
PMO005246	0.0828513	0.297296	FALSE	brown
PMO005276	0.000893565	0.743184	TRUE	brown
PMO005308	0.413795	-0.00459586	FALSE	brown
PMO005314	0.212171	0.133986	FALSE	brown
PMO005341	0.5435	-0.0673471	FALSE	brown
PMO005349	0.0803494	0.302068	FALSE	brown
PMO005391	0.58277	-0.0840227	FALSE	brown
PMO005443	0.00826788	0.578935	TRUE	brown
PMO005496	0.119652	0.237493	FALSE	brown
PMO005504	0.12098	0.23562	FALSE	brown
PMO005555	0.220593	0.126462	FALSE	brown
PMO005632	0.0386742	0.406742	TRUE	brown
PMO005655	0.426276	-0.0112519	FALSE	brown
PMO005708	0.00045556	0.778892	TRUE	brown
PMO005711	0.0492165	0.374095	TRUE	brown
PMO005725	0.0720284	0.31882	FALSE	brown
PMO005793	0.55877	-0.0739395	FALSE	brown
PMO005856	0.00409641	0.639776	TRUE	brown
PMO005997	0.633152	-0.104182	FALSE	brown
PMO006064	0.261001	0.0931928	FALSE	brown
PMO006106	0.102026	0.264025	FALSE	brown
PMO006128	0.0172326	0.50429	TRUE	brown
PMO006132	0.0736617	0.315417	FALSE	brown
PMO006178	0.130738	0.22233	FALSE	brown
PMO006193	0.0647422	0.334773	FALSE	brown
PMO006205	0.289497	0.0720691	FALSE	brown
PMO006214	0.109919	0.251735	FALSE	brown
PMO006225	0.503977	-0.0495888	FALSE	brown
PMO006241	0.00708654	0.593118	TRUE	brown
PMO006252	0.0310483	0.435001	TRUE	brown
PMO006259	0.0385521	0.407158	TRUE	brown
PMO006265	0.159664	0.187011	FALSE	brown
PMO006338	0.00820038	0.579702	TRUE	brown
PMO006374	0.127284	0.226944	FALSE	brown
PMO006403	0.033946	0.423686	TRUE	brown
PMO006442	0.00527703	0.618921	TRUE	brown
PMO006487	0.0243667	0.464622	TRUE	brown
PMO006513	0.0373827	0.411202	TRUE	brown
PMO006519	0.314812	0.0546207	FALSE	brown
PMO006589	0.0392354	0.404839	TRUE	brown
PMO006620	0.0659189	0.332105	FALSE	brown
PMO006630	0.95576	-0.209994	FALSE	brown
PMO006654	0.122315	0.233755	FALSE	brown
PMO006663	0.0352078	0.418993	TRUE	brown
PMO006673	0.229593	0.118665	FALSE	brown
PMO006724	0.140607	0.209652	FALSE	brown
PMO006725	0.319463	0.0515348	FALSE	brown
PMO006732	0.291257	0.0708185	FALSE	brown
PMO006838	0.0763516	0.309939	FALSE	brown
PMO006845	0.00708801	0.593099	TRUE	brown
PMO006895	0.0674017	0.328796	FALSE	brown
PMO006896	0.0232988	0.469928	TRUE	brown
PMO006957	0.232077	0.116555	FALSE	brown
PMO006961	0.071028	0.320934	FALSE	brown
PMO007027	0.665213	-0.11637	FALSE	brown
PMO007050	0.28793	0.0731879	FALSE	brown
PMO007111	0.63685	-0.105612	FALSE	brown
PMO007131	0.0263039	0.455443	TRUE	brown
PMO007209	0.0381094	0.408678	TRUE	brown
PMO007217	0.110086	0.251482	FALSE	brown
PMO007280	0.309221	0.0583776	FALSE	brown
PMO007333	0.0440473	0.389341	TRUE	brown
PMO007335	0.281932	0.0775134	FALSE	brown
PMO007365	0.0192583	0.491894	TRUE	brown
PMO007387	0.119361	0.237905	FALSE	brown
PMO007401	0.157711	0.189231	FALSE	brown
PMO007450	0.0348275	0.420394	TRUE	brown
PMO007471	0.356223	0.0282984	FALSE	brown
PMO007554	0.858949	-0.181616	FALSE	brown
PMO007561	0.178943	0.166153	FALSE	brown
PMO007594	0.258064	0.0954699	FALSE	brown
PMO007672	0.012705	0.536754	TRUE	brown
PMO007681	0.266044	0.0893282	FALSE	brown
PMO007693	0.0135362	0.530185	TRUE	brown
PMO007752	0.00788898	0.583302	TRUE	brown
PMO007783	0.00136431	0.71786	TRUE	brown
PMO007803	0.0773717	0.307901	FALSE	brown
PMO007815	0.0103028	0.557835	TRUE	brown
PMO007891	0.00684187	0.596282	TRUE	brown
PMO007898	0.250133	0.101723	FALSE	brown
PMO007945	0.0249993	0.461564	TRUE	brown
PMO007951	0.0422583	0.394942	TRUE	brown
PMO008048	0.196261	0.148858	FALSE	brown
PMO008085	0.0813076	0.300227	FALSE	brown
PMO008088	0.367179	0.0217351	FALSE	brown
PMO008089	0.0404835	0.400683	TRUE	brown
PMO008100	0.173786	0.171553	FALSE	brown
PMO008102	0.0696119	0.323966	FALSE	brown
PMO008103	0.0453405	0.385401	TRUE	brown
PMO008113	0.230259	0.118098	FALSE	brown
PMO008190	0.107078	0.256077	FALSE	brown
PMO008235	0.0362858	0.415087	TRUE	brown
PMO008312	0.0568767	0.353648	FALSE	brown
PMO008341	0.187869	0.157084	FALSE	brown
PMO008345	0.490786	-0.0434209	FALSE	brown
PMO008346	0.0378259	0.409659	TRUE	brown
PMO008401	0.235345	0.113805	FALSE	brown
PMO008419	0.00757523	0.587043	TRUE	brown
PMO008485	0.0830123	0.296993	FALSE	brown
PMO008516	0.00275662	0.670128	TRUE	brown
PMO008582	0.0400074	0.402257	TRUE	brown
PMO008583	0.0584899	0.349619	FALSE	brown
PMO008604	0.58136	-0.0834395	FALSE	brown
PMO008636	0.71354	-0.133904	FALSE	brown
PMO008641	0.0674847	0.328612	FALSE	brown
PMO008654	0.0302856	0.438115	TRUE	brown
PMO008723	0.0482084	0.376967	TRUE	brown
PMO008732	0.0635032	0.337624	FALSE	brown
PMO008768	0.0345756	0.421328	TRUE	brown
PMO008775	0.184769	0.160194	FALSE	brown
PMO008789	0.215893	0.130633	FALSE	brown
PMO008808	0.127589	0.226533	FALSE	brown
PMO008810	0.00264019	0.673277	TRUE	brown
PMO008832	0.240986	0.109129	FALSE	brown
PMO008907	0.00121797	0.724885	TRUE	brown
PMO008912	0.0694332	0.324352	FALSE	brown
PMO008962	0.0560562	0.355732	FALSE	brown
PMO009010	0.0656038	0.332816	FALSE	brown
PMO009087	0.0235348	0.468739	TRUE	brown
PMO009099	0.0252304	0.460462	TRUE	brown
PMO009155	0.15251	0.19525	FALSE	brown
PMO009172	0.0756413	0.311371	FALSE	brown
PMO009173	0.25785	0.0956369	FALSE	brown
PMO009226	0.189422	0.15554	FALSE	brown
PMO009232	0.62287	-0.100172	FALSE	brown
PMO009254	0.293395	0.069307	FALSE	brown
PMO009271	6.44944e-08	0.969149	TRUE	brown
PMO009319	0.222759	0.124563	FALSE	brown
PMO009382	0.0189291	0.493838	TRUE	brown
PMO009463	0.0658577	0.332243	FALSE	brown
PMO009473	0.0453721	0.385306	TRUE	brown
PMO009500	0.00493448	0.624563	TRUE	brown
PMO009576	0.0766066	0.309427	FALSE	brown
PMO009590	0.173884	0.17145	FALSE	brown
PMO009667	0.0230425	0.471229	TRUE	brown
PMO009691	0.232891	0.115868	FALSE	brown
PMO009702	0.267105	0.0885217	FALSE	brown
PMO009749	0.108794	0.253444	FALSE	brown
PMO009752	0.0633798	0.33791	FALSE	brown
PMO009777	0.517262	-0.0556753	FALSE	brown
PMO009778	0.157592	0.189366	FALSE	brown
PMO009848	0.353067	0.0302182	FALSE	brown
PMO009863	0.155247	0.192063	FALSE	brown
PMO009866	0.205528	0.140086	FALSE	brown
PMO009881	0.236701	0.112674	FALSE	brown
PMO009983	0.0192967	0.491669	TRUE	brown
PMO010009	0.464616	-0.0307921	FALSE	brown
PMO010068	0.0347527	0.420671	TRUE	brown
PMO010072	0.202304	0.143102	FALSE	brown
PMO010087	0.250663	0.1013	FALSE	brown
PMO010090	0.00847663	0.576596	TRUE	brown
PMO010091	0.0609749	0.343577	FALSE	brown
PMO010092	0.272902	0.0841624	FALSE	brown
PMO010102	0.225276	0.122375	FALSE	brown
PMO010113	0.175278	0.169978	FALSE	brown
PMO010156	0.506094	-0.050567	FALSE	brown
PMO010180	0.0546185	0.359441	FALSE	brown
PMO010190	0.177984	0.167147	FALSE	brown
PMO010191	0.320978	0.0505371	FALSE	brown
PMO010211	0.243572	0.107013	FALSE	brown
PMO010215	0.56299	-0.0757363	FALSE	brown
PMO010273	0.282442	0.0771428	FALSE	brown
PMO010424	0.18833	0.156624	FALSE	brown
PMO010513	0.0100064	0.560694	TRUE	brown
PMO010593	0.0237545	0.467641	TRUE	brown
PMO010598	0.0414183	0.397635	TRUE	brown
PMO010651	0.0586223	0.349292	FALSE	brown
PMO010694	0.000314879	0.796315	TRUE	brown
PMO010709	9.96404e-05	0.84227	TRUE	brown
PMO010717	0.0297869	0.440185	TRUE	brown
PMO010799	0.0971757	0.271947	FALSE	brown
PMO010851	0.834575	-0.174081	FALSE	brown
PMO010932	0.101471	0.264915	FALSE	brown
PMO010997	0.00232166	0.682479	TRUE	brown
PMO011025	0.0823988	0.298151	FALSE	brown
PMO011143	0.117869	0.240033	FALSE	brown
PMO011174	0.472226	-0.0345202	FALSE	brown
PMO011202	0.0244046	0.464437	TRUE	brown
PMO011212	0.0793418	0.304023	FALSE	brown
PMO011461	0.104944	0.259397	FALSE	brown
PMO011485	0.378763	0.0149595	FALSE	brown
PMO011502	0.170747	0.174795	FALSE	brown
PMO011556	0.615547	-0.0972846	FALSE	brown
PMO011586	0.41816	-0.00694127	FALSE	brown
PMO011688	0.0585228	0.349537	FALSE	brown
PMO011732	0.0494977	0.373302	TRUE	brown
PMO011733	0.0536185	0.362066	FALSE	brown
PMO011735	0.191051	0.153931	FALSE	brown
PMO011744	0.139252	0.21135	FALSE	brown
PMO011825	0.00161058	0.707262	TRUE	brown
PMO011850	0.01083	0.552904	TRUE	brown
PMO011941	0.31131	0.0569682	FALSE	brown
PMO011956	0.0733615	0.316038	FALSE	brown
PMO012015	0.0836636	0.295771	FALSE	brown
PMO012026	0.208524	0.137316	FALSE	brown
PMO012059	0.0273166	0.450852	TRUE	brown
PMO012063	0.016155	0.511352	TRUE	brown
PMO012071	0.195748	0.149353	FALSE	brown
PMO012130	0.110059	0.251524	FALSE	brown
PMO012166	0.123024	0.23277	FALSE	brown
PMO012167	0.0672438	0.329145	FALSE	brown
PMO012226	0.150125	0.198064	FALSE	brown
PMO012232	0.0968035	0.272568	FALSE	brown
PMO012243	0.0154903	0.515893	TRUE	brown
PMO012278	0.239983	0.109954	FALSE	brown
PMO012311	0.00930372	0.567744	TRUE	brown
PMO012315	0.352906	0.0303167	FALSE	brown
PMO012354	0.179773	0.165294	FALSE	brown
PMO012357	0.162662	0.183642	FALSE	brown
PMO012363	0.0274727	0.450156	TRUE	brown
PMO012378	0.0745413	0.313609	FALSE	brown
PMO012391	0.404561	0.00042984	FALSE	brown
PMO012395	0.278476	0.0800387	FALSE	brown
PMO012402	0.0129537	0.534755	TRUE	brown
PMO012431	0.531311	-0.0619805	FALSE	brown
PMO012441	0.134188	0.217816	FALSE	brown
PMO012445	0.0412278	0.398252	TRUE	brown
PMO012454	0.596001	-0.0894445	FALSE	brown
PMO012465	0.126018	0.228659	FALSE	brown
PMO012468	0.521114	-0.0574169	FALSE	brown
PMO012505	0.0400147	0.402232	TRUE	brown
PMO012545	0.204256	0.141272	FALSE	brown
PMO012568	0.412394	-0.0038391	FALSE	brown
PMO012604	0.0987469	0.269347	FALSE	brown
PMO012605	0.294633	0.0684362	FALSE	brown
PMO012630	0.0277743	0.448821	TRUE	brown
PMO012725	0.649472	-0.110445	FALSE	brown
PMO012726	0.38717	0.0101421	FALSE	brown
PMO012733	0.0664651	0.330879	FALSE	brown
PMO012764	0.1575	0.189472	FALSE	brown
PMO012776	0.579054	-0.082483	FALSE	brown
PMO012785	0.0230301	0.471292	TRUE	brown
PMO012806	0.0226126	0.473437	TRUE	brown
PMO012807	0.488306	-0.042247	FALSE	brown
PMO012819	0.0726136	0.317594	FALSE	brown
PMO012923	0.22319	0.124188	FALSE	brown
PMO012928	0.224082	0.123411	FALSE	brown
PMO012985	0.775296	-0.155014	FALSE	brown
PMO013022	0.0171474	0.504835	TRUE	brown
PMO013030	0.00860528	0.575176	TRUE	brown
PMO013089	0.707572	-0.13179	FALSE	brown
PMO013104	0.432286	-0.0144026	FALSE	brown
PMO013246	0.181421	0.1636	FALSE	brown
PMO013413	0.121944	0.234272	FALSE	brown
PMO013442	0.122078	0.234084	FALSE	brown
PMO013496	0.0300149	0.439236	TRUE	brown
PMO013545	0.492244	-0.0441092	FALSE	brown
PMO013563	0.230149	0.118191	FALSE	brown
PMO013581	0.141808	0.208157	FALSE	brown
PMO013582	0.0114605	0.547246	TRUE	brown
PMO013617	0.259697	0.0942016	FALSE	brown
PMO013644	0.279124	0.0795633	FALSE	brown
PMO013796	0.0188488	0.494315	TRUE	brown
PMO013876	0.229148	0.119045	FALSE	brown
PMO013931	0.0271255	0.451708	TRUE	brown
PMO013932	0.0271255	0.451708	TRUE	brown
PMO014045	0.254065	0.0986035	FALSE	brown
PMO014069	0.124097	0.231288	FALSE	brown
PMO014075	0.123355	0.232312	FALSE	brown
PMO014078	0.0384774	0.407414	TRUE	brown
PMO014088	0.179535	0.16554	FALSE	brown
PMO014098	0.0798081	0.303116	FALSE	brown
PMO014112	0.132922	0.219462	FALSE	brown
PMO014117	0.586351	-0.0854994	FALSE	brown
PMO014124	0.023363	0.469603	TRUE	brown
PMO014145	0.0453423	0.385396	TRUE	brown
PMO014201	0.0119271	0.543213	TRUE	brown
PMO014226	0.263412	0.0913377	FALSE	brown
PMO014236	0.128683	0.225064	FALSE	brown
PMO014237	0.0627595	0.339356	FALSE	brown
PMO014243	0.1697	0.175922	FALSE	brown
PMO014249	0.406508	-0.000637179	FALSE	brown
PMO014267	0.098529	0.269706	FALSE	brown
PMO014324	0.18102	0.164011	FALSE	brown
PMO014361	0.348371	0.0330994	FALSE	brown
PMO014405	0.499974	-0.0477305	FALSE	brown
PMO014446	0.0939949	0.277311	FALSE	brown
PMO014474	0.0401197	0.401884	TRUE	brown
PMO014495	0.00624864	0.604338	TRUE	brown
PMO014511	0.3608	0.0255377	FALSE	brown
PMO014591	0.120577	0.236188	FALSE	brown
PMO014595	0.153599	0.193977	FALSE	brown
PMO014617	0.111583	0.249233	FALSE	brown
PMO014618	0.139716	0.210768	FALSE	brown
PMO014627	0.0539456	0.361203	FALSE	brown
PMO014629	0.512075	-0.0533134	FALSE	brown
PMO014633	0.103841	0.261134	FALSE	brown
PMO014641	0.0775398	0.307567	FALSE	brown
PMO014668	0.226634	0.121202	FALSE	brown
PMO014787	0.163781	0.182398	FALSE	brown
PMO014790	0.057855	0.351194	FALSE	brown
PMO014792	0.273886	0.08343	FALSE	brown
PMO014794	0.214289	0.132073	FALSE	brown
PMO014795	0.202234	0.143168	FALSE	brown
PMO014796	0.929854	-0.202628	FALSE	brown
PMO014799	0.184444	0.160523	FALSE	brown
PMO014821	0.0798173	0.303098	FALSE	brown
PMO014826	0.097468	0.271461	FALSE	brown
PMO014836	0.019464	0.490693	TRUE	brown
PMO014837	0.639555	-0.106654	FALSE	brown
PMO014854	0.0345898	0.421276	TRUE	brown
PMO014916	0.0319861	0.431253	TRUE	brown
PMO015045	0.342874	0.0365112	FALSE	brown
PMO015054	0.142962	0.206729	FALSE	brown
PMO015092	0.406327	-0.000537904	FALSE	brown
PMO015128	0.0251841	0.460682	TRUE	brown
PMO015129	0.159068	0.187686	FALSE	brown
PMO015238	0.0156758	0.514611	TRUE	brown
PMO015260	0.0632901	0.338118	FALSE	brown
PMO015288	0.0220409	0.476425	TRUE	brown
PMO015339	0.0169479	0.506121	TRUE	brown
PMO015351	0.0438246	0.390028	TRUE	brown
PMO015373	0.139775	0.210693	FALSE	brown
PMO015451	0.0895419	0.285064	FALSE	brown
PMO015486	0.131414	0.221439	FALSE	brown
PMO015491	0.0795793	0.30356	FALSE	brown
PMO015497	0.0172019	0.504486	TRUE	brown
PMO015527	0.171175	0.174336	FALSE	brown
PMO015531	0.186108	0.158846	FALSE	brown
PMO015587	0.084473	0.294263	FALSE	brown
PMO015613	0.617043	-0.097877	FALSE	brown
PMO015678	0.0871104	0.289425	FALSE	brown
PMO015679	0.0308062	0.435983	TRUE	brown
PMO015684	0.637373	-0.105814	FALSE	brown
PMO015746	0.331648	0.0436124	FALSE	brown
PMO015753	0.129926	0.223407	FALSE	brown
PMO015780	0.00741736	0.588971	TRUE	brown
PMO015782	0.0793061	0.304092	FALSE	brown
PMO015808	0.207203	0.138534	FALSE	brown
PMO015822	0.16701	0.178843	FALSE	brown
PMO015834	0.0553554	0.357531	FALSE	brown
PMO015885	0.00983511	0.562376	TRUE	brown
PMO015908	0.0298087	0.440094	TRUE	brown
PMO015919	0.0892171	0.285641	FALSE	brown
PMO015944	0.0500063	0.371877	FALSE	brown
PMO016155	0.175384	0.169866	FALSE	brown
PMO016193	0.0191884	0.492304	TRUE	brown
PMO016214	0.0515789	0.36754	FALSE	brown
PMO016221	0.00132726	0.719581	TRUE	brown
PMO016232	0.106871	0.256397	FALSE	brown
PMO016235	0.226346	0.12145	FALSE	brown
PMO016242	0.6156	-0.0973056	FALSE	brown
PMO016352	0.0535418	0.362269	FALSE	brown
PMO016457	0.0789652	0.304758	FALSE	brown
PMO016490	0.00502549	0.623035	TRUE	brown
PMO016495	0.193237	0.15179	FALSE	brown
PMO016513	0.7798	-0.156502	FALSE	brown
PMO016528	0.00945515	0.566191	TRUE	brown
PMO016564	0.247637	0.103723	FALSE	brown
PMO016671	0.024941	0.461843	TRUE	brown
PMO016672	0.00625518	0.604246	TRUE	brown
PMO016760	0.246562	0.104588	FALSE	brown
PMO016861	0.0612484	0.342924	FALSE	brown
PMO016989	0.117869	0.240033	FALSE	brown
PMO000006	0.013922	0.685232	TRUE	green
PMO000048	0.0157425	0.676308	TRUE	green
PMO000111	0.166106	0.427113	FALSE	green
PMO000128	0.0302231	0.623691	TRUE	green
PMO000133	0.524688	0.204055	FALSE	green
PMO000135	0.13106	0.46142	FALSE	green
PMO000171	0.195436	0.401786	FALSE	green
PMO000277	0.0556569	0.564885	FALSE	green
PMO000327	0.157861	0.434732	FALSE	green
PMO000355	0.116585	0.477335	FALSE	green
PMO000527	0.00176281	0.800462	TRUE	green
PMO000600	0.0526736	0.570634	FALSE	green
PMO000784	0.125382	0.467519	FALSE	green
PMO000797	0.00495558	0.7501	TRUE	green
PMO000872	0.0138419	0.685644	TRUE	green
PMO000882	0.0278273	0.630884	TRUE	green
PMO000951	0.0271051	0.633141	TRUE	green
PMO000974	0.0614756	0.554264	FALSE	green
PMO001088	0.178513	0.416084	FALSE	green
PMO001089	0.170178	0.423438	FALSE	green
PMO001100	0.0729792	0.535162	FALSE	green
PMO001134	0.0276367	0.631476	TRUE	green
PMO001162	0.106111	0.489683	FALSE	green
PMO001179	0.0957903	0.50267	FALSE	green
PMO001214	0.306057	0.322846	FALSE	green
PMO001247	0.173001	0.420922	FALSE	green
PMO001307	0.0215934	0.651977	TRUE	green
PMO001310	0.267837	0.347877	FALSE	green
PMO001390	0.0794486	0.525317	FALSE	green
PMO001416	0.0486393	0.578783	TRUE	green
PMO001495	0.327474	0.309581	FALSE	green
PMO001572	0.0133046	0.688454	TRUE	green
PMO001643	0.00506528	0.748891	TRUE	green
PMO001654	0.103494	0.492892	FALSE	green
PMO001802	0.0536253	0.568776	FALSE	green
PMO001814	0.0899897	0.510386	FALSE	green
PMO001992	0.0309037	0.621722	TRUE	green
PMO001994	0.200006	0.398058	FALSE	green
PMO002058	0.027687	0.631319	TRUE	green
PMO002107	0.0542284	0.56761	FALSE	green
PMO002323	0.0480049	0.580107	TRUE	green
PMO002432	0.0413147	0.594887	TRUE	green
PMO002448	0.15016	0.442082	FALSE	green
PMO002474	0.0193679	0.660585	TRUE	green
PMO002482	0.0373398	0.604491	TRUE	green
PMO002491	0.0199942	0.658092	TRUE	green
PMO002534	0.0645372	0.548954	FALSE	green
PMO002588	0.0113513	0.699437	TRUE	green
PMO002639	0.193014	0.403785	FALSE	green
PMO002722	0.00122137	0.815586	TRUE	green
PMO002742	0.0010889	0.820061	TRUE	green
PMO002745	0.00497264	0.74991	TRUE	green
PMO002753	0.0079426	0.722563	TRUE	green
PMO002865	0.130293	0.462234	FALSE	green
PMO002957	0.274168	0.343596	FALSE	green
PMO003008	0.0500365	0.575909	FALSE	green
PMO003211	0.0884049	0.512553	FALSE	green
PMO003401	0.0107711	0.702969	TRUE	green
PMO003434	0.0751712	0.531762	FALSE	green
PMO003477	0.0283234	0.629359	TRUE	green
PMO003490	0.0480349	0.580044	TRUE	green
PMO003527	0.00182226	0.79903	TRUE	green
PMO003565	0.0551421	0.565862	FALSE	green
PMO003763	0.778966	0.0908082	FALSE	green
PMO003786	0.0407264	0.596266	TRUE	green
PMO003851	0.0284371	0.629012	TRUE	green
PMO003972	0.00298979	0.776274	TRUE	green
PMO004028	0.0491928	0.577637	TRUE	green
PMO004047	0.306033	0.322861	FALSE	green
PMO004081	0.046392	0.58353	TRUE	green
PMO004175	0.261172	0.352447	FALSE	green
PMO004188	0.0872539	0.514142	FALSE	green
PMO004210	0.04509	0.586355	TRUE	green
PMO004241	0.189853	0.406415	FALSE	green
PMO004258	0.00102637	0.82232	TRUE	green
PMO004289	0.000535862	0.845244	TRUE	green
PMO004386	0.0571323	0.562122	FALSE	green
PMO004620	0.210129	0.38998	FALSE	green
PMO004637	0.193141	0.40368	FALSE	green
PMO004811	0.04843	0.579218	TRUE	green
PMO004904	0.0100604	0.707492	TRUE	green
PMO004943	0.0024955	0.78489	TRUE	green
PMO005067	0.128803	0.463823	FALSE	green
PMO005111	0.0369706	0.605419	TRUE	green
PMO005196	0.0863531	0.515396	FALSE	green
PMO005247	0.157918	0.43468	FALSE	green
PMO005564	0.0875681	0.513707	FALSE	green
PMO005879	0.0626822	0.55215	FALSE	green
PMO005968	0.1314	0.461061	FALSE	green
PMO005987	0.0108304	0.702601	TRUE	green
PMO006294	0.280092	0.339641	FALSE	green
PMO006316	0.0509103	0.57414	FALSE	green
PMO006336	0.0143292	0.683165	TRUE	green
PMO006388	0.00123359	0.815193	TRUE	green
PMO006436	0.00453682	0.754907	TRUE	green
PMO006750	0.0777958	0.527779	FALSE	green
PMO006781	0.0560818	0.564084	FALSE	green
PMO006818	0.0805055	0.523762	FALSE	green
PMO006830	0.026515	0.635016	TRUE	green
PMO006848	0.0661916	0.546157	FALSE	green
PMO006897	0.0312096	0.620848	TRUE	green
PMO006913	0.0606239	0.555774	FALSE	green
PMO007025	0.0133629	0.688146	TRUE	green
PMO007086	0.0795097	0.525227	FALSE	green
PMO007147	0.0207092	0.655316	TRUE	green
PMO007198	0.00146357	0.808291	TRUE	green
PMO007226	0.00692341	0.730915	TRUE	green
PMO007261	0.0304964	0.622897	TRUE	green
PMO007518	0.0574704	0.561495	FALSE	green
PMO007562	0.0232237	0.646073	TRUE	green
PMO007574	0.0766155	0.529558	FALSE	green
PMO007772	0.0898374	0.510593	FALSE	green
PMO007775	0.0164834	0.672894	TRUE	green
PMO007829	0.00204892	0.79388	TRUE	green
PMO007851	0.11996	0.473513	FALSE	green
PMO007896	0.0392717	0.599737	TRUE	green
PMO007960	0.492242	0.219903	FALSE	green
PMO007970	0.150624	0.441633	FALSE	green
PMO007979	0.01451	0.682261	TRUE	green
PMO008005	0.420778	0.2566	FALSE	green
PMO008047	0.0101365	0.706997	TRUE	green
PMO008059	0.15867	0.433974	FALSE	green
PMO008406	0.0192731	0.660967	TRUE	green
PMO008554	0.0110337	0.701353	TRUE	green
PMO008555	0.040348	0.59716	TRUE	green
PMO008565	0.00415499	0.759592	TRUE	green
PMO008568	0.0228208	0.647504	TRUE	green
PMO008574	0.161277	0.431546	FALSE	green
PMO008730	0.11064	0.484248	FALSE	green
PMO008736	0.056875	0.5626	FALSE	green
PMO008903	0.00995277	0.708198	TRUE	green
PMO008927	0.0832457	0.519792	FALSE	green
PMO009090	0.0171939	0.669724	TRUE	green
PMO009219	0.56889	0.183126	FALSE	green
PMO009220	0.107135	0.488441	FALSE	green
PMO009286	0.0152021	0.678874	TRUE	green
PMO009656	0.00365268	0.766281	TRUE	green
PMO009790	0.11991	0.47357	FALSE	green
PMO010007	0.192916	0.403866	FALSE	green
PMO010120	0.0125664	0.692455	TRUE	green
PMO010161	0.0115902	0.698022	TRUE	green
PMO010228	0.0377548	0.603455	TRUE	green
PMO010269	0.0125078	0.69278	TRUE	green
PMO010283	0.111237	0.483543	FALSE	green
PMO010453	0.0971755	0.500874	FALSE	green
PMO010473	0.0758901	0.530661	FALSE	green
PMO010580	0.433291	0.249971	FALSE	green
PMO010853	0.0031223	0.77415	TRUE	green
PMO010856	0.00392789	0.762536	TRUE	green
PMO010968	0.353671	0.293984	FALSE	green
PMO011440	0.0500966	0.575786	FALSE	green
PMO011591	0.0175045	0.668368	TRUE	green
PMO011617	0.00557204	0.743553	TRUE	green
PMO011830	0.0207683	0.655089	TRUE	green
PMO011940	0.0267751	0.634186	TRUE	green
PMO011946	0.0190806	0.661749	TRUE	green
PMO012002	0.0990345	0.498491	FALSE	green
PMO012039	0.105783	0.490081	FALSE	green
PMO012208	0.502342	0.214922	FALSE	green
PMO012258	0.507324	0.21248	FALSE	green
PMO012295	0.224795	0.378686	FALSE	green
PMO012393	0.125251	0.467661	FALSE	green
PMO012396	0.0104593	0.704925	TRUE	green
PMO012401	0.0367192	0.606055	TRUE	green
PMO012446	0.0104241	0.705149	TRUE	green
PMO012511	0.0717707	0.537066	FALSE	green
PMO012530	0.0689	0.541681	FALSE	green
PMO012612	0.0786686	0.526475	FALSE	green
PMO012623	0.0814374	0.522402	FALSE	green
PMO012736	0.0504937	0.57498	FALSE	green
PMO012850	0.245147	0.363721	FALSE	green
PMO013072	0.0208476	0.654786	TRUE	green
PMO013405	0.180053	0.414749	FALSE	green
PMO013600	0.0125344	0.692632	TRUE	green
PMO013667	0.0117675	0.696986	TRUE	green
PMO013832	0.0144126	0.682747	TRUE	green
PMO013847	0.0241331	0.64291	TRUE	green
PMO013894	0.0140235	0.684713	TRUE	green
PMO014043	0.387887	0.274508	FALSE	green
PMO014079	0.118875	0.474734	FALSE	green
PMO014111	0.000283505	0.864677	TRUE	green
PMO014144	0.0212453	0.653279	TRUE	green
PMO014310	5.41359e-05	0.904152	TRUE	green
PMO014322	0.0108636	0.702396	TRUE	green
PMO014391	0.0585547	0.559504	FALSE	green
PMO014404	0.169006	0.42449	FALSE	green
PMO014413	0.370845	0.284091	FALSE	green
PMO014623	0.014549	0.682067	TRUE	green
PMO014635	0.187358	0.408511	FALSE	green
PMO014669	0.0267057	0.634407	TRUE	green
PMO014741	0.00462068	0.753918	TRUE	green
PMO014802	0.0124805	0.692932	TRUE	green
PMO014850	0.0144856	0.682382	TRUE	green
PMO014880	0.176604	0.417749	FALSE	green
PMO014935	0.215318	0.38593	FALSE	green
PMO014938	0.216483	0.38503	FALSE	green
PMO015010	0.0486379	0.578786	TRUE	green
PMO015014	0.136616	0.455616	FALSE	green
PMO015015	0.0101617	0.706833	TRUE	green
PMO015062	0.0133369	0.688283	TRUE	green
PMO015244	0.0239563	0.643518	TRUE	green
PMO015257	0.0564358	0.56342	FALSE	green
PMO015341	0.0144553	0.682533	TRUE	green
PMO015383	0.174879	0.419263	FALSE	green
PMO015831	0.48337	0.224316	FALSE	green
PMO015860	0.00964531	0.710245	TRUE	green
PMO015931	0.0221526	0.649917	TRUE	green
PMO015937	0.0544021	0.567276	FALSE	green
PMO015979	0.0104975	0.704683	TRUE	green
PMO015995	0.0196404	0.659494	TRUE	green
PMO016018	0.0337714	0.613755	TRUE	green
PMO016070	0.106238	0.489527	FALSE	green
PMO016268	0.0203773	0.656596	TRUE	green
PMO016300	0.0262716	0.635799	TRUE	green
PMO016336	0.537704	0.197818	FALSE	green
PMO016387	0.0033094	0.771266	TRUE	green
PMO016390	0.00756202	0.725582	TRUE	green
PMO016398	0.0112646	0.699956	TRUE	green
PMO016426	0.00193597	0.796389	TRUE	green
PMO016594	0.00229593	0.788741	TRUE	green
PMO016846	0.104126	0.492112	FALSE	green
PMO016900	0.153791	0.438588	FALSE	green
PMO016940	0.00444185	0.756044	TRUE	green
PMO000003	0.709671	0.120264	FALSE	grey
PMO000064	0.00706763	0.72968	TRUE	grey
PMO000081	0.1016	0.495251	FALSE	grey
PMO000102	0.56399	0.185412	FALSE	grey
PMO000103	0.427137	0.253219	FALSE	grey
PMO000105	0.044111	0.588517	TRUE	grey
PMO000116	0.365939	0.286892	FALSE	grey
PMO000122	0.695827	0.126245	FALSE	grey
PMO000125	0.0600964	0.556716	FALSE	grey
PMO000151	0.695231	0.126503	FALSE	grey
PMO000155	0.639376	0.15104	FALSE	grey
PMO000167	0.732053	0.110668	FALSE	grey
PMO000172	0.263175	0.351066	FALSE	grey
PMO000180	0.205837	0.393375	FALSE	grey
PMO000187	0.602829	0.1675	FALSE	grey
PMO000190	0.164595	0.428491	FALSE	grey
PMO000192	0.326126	0.310402	FALSE	grey
PMO000203	0.365984	0.286866	FALSE	grey
PMO000222	0.891443	0.044227	FALSE	grey
PMO000238	0.501781	0.215197	FALSE	grey
PMO000242	0.344833	0.299175	FALSE	grey
PMO000262	0.128305	0.464357	FALSE	grey
PMO000278	0.0752077	0.531706	FALSE	grey
PMO000284	0.960307	0.0161347	FALSE	grey
PMO000323	0.351781	0.295088	FALSE	grey
PMO000328	0.311618	0.319353	FALSE	grey
PMO000338	0.0616956	0.553877	FALSE	grey
PMO000339	0.672499	0.136408	FALSE	grey
PMO000341	0.431227	0.251058	FALSE	grey
PMO000346	0.606569	0.165799	FALSE	grey
PMO000407	0.567285	0.183874	FALSE	grey
PMO000426	0.0299047	0.624623	TRUE	grey
PMO000428	0.572544	0.181426	FALSE	grey
PMO000437	0.187266	0.408589	FALSE	grey
PMO000473	0.0337207	0.613891	TRUE	grey
PMO000474	0.306172	0.322773	FALSE	grey
PMO000496	0.83533	0.0673186	FALSE	grey
PMO000546	0.00419862	0.759041	TRUE	grey
PMO000549	0.862962	0.0559179	FALSE	grey
PMO000591	0.738258	0.108022	FALSE	grey
PMO000598	0.807618	0.0788237	FALSE	grey
PMO000599	0.703839	0.122779	FALSE	grey
PMO000615	0.117245	0.476582	FALSE	grey
PMO000626	0.0278218	0.630902	TRUE	grey
PMO000640	0.526565	0.203152	FALSE	grey
PMO000647	0.15718	0.435373	FALSE	grey
PMO000649	0.715182	0.117893	FALSE	grey
PMO000659	0.988466	0.00468683	FALSE	grey
PMO000672	0.822992	0.0724312	FALSE	grey
PMO000675	0.35835	0.291264	FALSE	grey
PMO000681	0.729782	0.111637	FALSE	grey
PMO000683	0.398046	0.268898	FALSE	grey
PMO000689	0.947759	0.0212408	FALSE	grey
PMO000714	0.410724	0.261997	FALSE	grey
PMO000717	0.194071	0.402911	FALSE	grey
PMO000719	0.0452578	0.585988	TRUE	grey
PMO000722	0.465383	0.23338	FALSE	grey
PMO000730	0.877013	0.0501435	FALSE	grey
PMO000736	0.331005	0.307441	FALSE	grey
PMO000741	0.783523	0.0888953	FALSE	grey
PMO000752	0.792064	0.0853171	FALSE	grey
PMO000771	0.53354	0.199807	FALSE	grey
PMO000800	0.00826832	0.720064	TRUE	grey
PMO000807	0.386987	0.275008	FALSE	grey
PMO000810	0.231672	0.373541	FALSE	grey
PMO000817	0.89942	0.040962	FALSE	grey
PMO000822	0.0424312	0.592308	TRUE	grey
PMO000825	0.994793	0.00211598	FALSE	grey
PMO000827	0.421329	0.256306	FALSE	grey
PMO000828	0.0400565	0.597853	TRUE	grey
PMO000840	0.598814	0.16933	FALSE	grey
PMO000852	0.414507	0.259959	FALSE	grey
PMO000875	0.711635	0.119419	FALSE	grey
PMO000879	0.459101	0.236584	FALSE	grey
PMO000883	0.0516029	0.572753	FALSE	grey
PMO000895	0.109561	0.48553	FALSE	grey
PMO000907	0.021957	0.650633	TRUE	grey
PMO000921	0.736115	0.108935	FALSE	grey
PMO000928	0.337134	0.303754	FALSE	grey
PMO000932	0.171013	0.422691	FALSE	grey
PMO000946	0.8304	0.06936	FALSE	grey
PMO000953	0.781112	0.089907	FALSE	grey
PMO000964	0.0863296	0.515429	FALSE	grey
PMO000966	0.884238	0.0471794	FALSE	grey
PMO000979	0.927978	0.0292996	FALSE	grey
PMO000987	0.454944	0.238715	FALSE	grey
PMO000992	0.898519	0.0413306	FALSE	grey
PMO000999	0.560951	0.186834	FALSE	grey
PMO001006	0.898642	0.0412803	FALSE	grey
PMO001030	0.0577517	0.560976	FALSE	grey
PMO001031	0.96438	0.0144782	FALSE	grey
PMO001062	0.790891	0.085808	FALSE	grey
PMO001066	0.801446	0.0813968	FALSE	grey
PMO001072	0.0398487	0.598349	TRUE	grey
PMO001076	0.644917	0.148575	FALSE	grey
PMO001077	0.12593	0.466923	FALSE	grey
PMO001079	0.155399	0.437057	FALSE	grey
PMO001080	0.762863	0.097589	FALSE	grey
PMO001092	0.501587	0.215292	FALSE	grey
PMO001094	0.179739	0.415021	FALSE	grey
PMO001117	0.976285	0.00963796	FALSE	grey
PMO001138	0.280034	0.33968	FALSE	grey
PMO001148	0.194884	0.40224	FALSE	grey
PMO001157	0.916682	0.033908	FALSE	grey
PMO001174	0.723343	0.114392	FALSE	grey
PMO001196	0.418957	0.257573	FALSE	grey
PMO001201	0.633517	0.153656	FALSE	grey
PMO001209	0.196439	0.400964	FALSE	grey
PMO001217	0.281735	0.338553	FALSE	grey
PMO001222	0.0457403	0.584937	TRUE	grey
PMO001226	0.677883	0.134052	FALSE	grey
PMO001232	0.603307	0.167282	FALSE	grey
PMO001235	0.657305	0.143089	FALSE	grey
PMO001243	0.906909	0.0379001	FALSE	grey
PMO001244	0.310313	0.32017	FALSE	grey
PMO001245	0.564794	0.185037	FALSE	grey
PMO001274	0.253156	0.358034	FALSE	grey
PMO001283	0.841952	0.0645803	FALSE	grey
PMO001288	0.211411	0.388974	FALSE	grey
PMO001295	0.317134	0.315924	FALSE	grey
PMO001296	0.414118	0.260168	FALSE	grey
PMO001308	0.82724	0.0706693	FALSE	grey
PMO001317	0.642973	0.149439	FALSE	grey
PMO001328	0.0442061	0.588306	TRUE	grey
PMO001329	0.850091	0.0612203	FALSE	grey
PMO001346	0.973728	0.0106773	FALSE	grey
PMO001349	0.0920296	0.507636	FALSE	grey
PMO001379	0.959217	0.0165783	FALSE	grey
PMO001387	0.875889	0.0506048	FALSE	grey
PMO001415	0.552881	0.190626	FALSE	grey
PMO001441	0.603325	0.167274	FALSE	grey
PMO001444	0.583714	0.176257	FALSE	grey
PMO001445	0.612575	0.163076	FALSE	grey
PMO001451	0.279584	0.339978	FALSE	grey
PMO001523	0.0745135	0.532775	FALSE	grey
PMO001535	0.975047	0.0101411	FALSE	grey
PMO001565	0.258881	0.354034	FALSE	grey
PMO001566	0.475908	0.228058	FALSE	grey
PMO001575	0.171472	0.422281	FALSE	grey
PMO001625	0.261617	0.35214	FALSE	grey
PMO001627	0.199509	0.39846	FALSE	grey
PMO001631	0.632949	0.15391	FALSE	grey
PMO001641	0.447557	0.242526	FALSE	grey
PMO001642	0.736184	0.108905	FALSE	grey
PMO001645	0.0688227	0.541807	FALSE	grey
PMO001649	0.623953	0.157943	FALSE	grey
PMO001653	0.018561	0.663885	TRUE	grey
PMO001665	0.944032	0.0227581	FALSE	grey
PMO001696	0.523432	0.20466	FALSE	grey
PMO001720	0.39024	0.273202	FALSE	grey
PMO001728	0.377313	0.280428	FALSE	grey
PMO001735	0.64314	0.149365	FALSE	grey
PMO001745	0.489455	0.221285	FALSE	grey
PMO001757	0.577193	0.17927	FALSE	grey
PMO001774	0.0467728	0.582714	TRUE	grey
PMO001815	0.092998	0.506344	FALSE	grey
PMO001818	0.985892	0.00573296	FALSE	grey
PMO001878	0.173778	0.420234	FALSE	grey
PMO001949	0.787721	0.0871354	FALSE	grey
PMO001990	0.0251729	0.639398	TRUE	grey
PMO002000	0.0722185	0.536358	FALSE	grey
PMO002026	0.947994	0.0211454	FALSE	grey
PMO002029	0.632869	0.153945	FALSE	grey
PMO002032	0.0225755	0.648383	TRUE	grey
PMO002036	0.853374	0.0598665	FALSE	grey
PMO002038	0.457857	0.237221	FALSE	grey
PMO002051	0.0165312	0.672677	TRUE	grey
PMO002069	0.585437	0.175463	FALSE	grey
PMO002100	0.860815	0.0568013	FALSE	grey
PMO002134	0.46002	0.236114	FALSE	grey
PMO002151	0.693192	0.127387	FALSE	grey
PMO002167	0.853531	0.0598017	FALSE	grey
PMO002188	0.155774	0.436701	FALSE	grey
PMO002203	0.122651	0.470517	FALSE	grey
PMO002225	0.0572616	0.561882	FALSE	grey
PMO002234	0.900643	0.0404617	FALSE	grey
PMO002247	0.794739	0.0841985	FALSE	grey
PMO002289	0.105941	0.489889	FALSE	grey
PMO002308	0.244934	0.363874	FALSE	grey
PMO002367	0.827624	0.0705102	FALSE	grey
PMO002393	0.22856	0.375858	FALSE	grey
PMO002412	0.381349	0.278158	FALSE	grey
PMO002413	0.614102	0.162385	FALSE	grey
PMO002436	0.514574	0.208947	FALSE	grey
PMO002449	0.168591	0.424864	FALSE	grey
PMO002452	0.318928	0.314815	FALSE	grey
PMO002456	0.707749	0.121092	FALSE	grey
PMO002465	0.0267012	0.634421	TRUE	grey
PMO002467	0.400696	0.267447	FALSE	grey
PMO002490	0.376206	0.281052	FALSE	grey
PMO002508	0.325007	0.311085	FALSE	grey
PMO002548	0.903772	0.0391821	FALSE	grey
PMO002549	0.117427	0.476375	FALSE	grey
PMO002562	0.0786329	0.526528	FALSE	grey
PMO002571	0.386098	0.275504	FALSE	grey
PMO002575	0.924485	0.030724	FALSE	grey
PMO002597	0.140523	0.451627	FALSE	grey
PMO002606	0.570948	0.182168	FALSE	grey
PMO002607	0.403153	0.266105	FALSE	grey
PMO002623	0.325438	0.310821	FALSE	grey
PMO002641	0.739174	0.107632	FALSE	grey
PMO002642	0.579356	0.178269	FALSE	grey
PMO002644	0.138617	0.453564	FALSE	grey
PMO002647	0.312261	0.318952	FALSE	grey
PMO002659	0.127508	0.465215	FALSE	grey
PMO002689	0.977092	0.00930973	FALSE	grey
PMO002703	0.612099	0.163291	FALSE	grey
PMO002733	0.286827	0.335203	FALSE	grey
PMO002746	0.793022	0.0849165	FALSE	grey
PMO002773	0.986998	0.00528348	FALSE	grey
PMO002808	0.204264	0.39463	FALSE	grey
PMO002824	0.28231	0.338173	FALSE	grey
PMO002835	0.472477	0.229786	FALSE	grey
PMO002838	0.0719087	0.536848	FALSE	grey
PMO002841	0.310851	0.319833	FALSE	grey
PMO002842	0.54473	0.194478	FALSE	grey
PMO002853	0.0384498	0.601738	TRUE	grey
PMO002862	0.422638	0.255608	FALSE	grey
PMO002878	0.354131	0.293716	FALSE	grey
PMO002888	0.472637	0.229705	FALSE	grey
PMO002892	0.146852	0.445312	FALSE	grey
PMO002900	0.966331	0.0136849	FALSE	grey
PMO002903	0.380927	0.278395	FALSE	grey
PMO002943	0.835599	0.0672074	FALSE	grey
PMO002953	0.334879	0.305107	FALSE	grey
PMO002960	0.288886	0.333858	FALSE	grey
PMO002989	0.724159	0.114042	FALSE	grey
PMO002991	0.418164	0.257997	FALSE	grey
PMO003009	0.784307	0.0885664	FALSE	grey
PMO003010	0.431449	0.250941	FALSE	grey
PMO003019	0.85776	0.0580594	FALSE	grey
PMO003030	0.211857	0.388625	FALSE	grey
PMO003031	0.527413	0.202744	FALSE	grey
PMO003037	0.811803	0.0770812	FALSE	grey
PMO003050	0.684266	0.131268	FALSE	grey
PMO003053	0.113111	0.481346	FALSE	grey
PMO003055	0.620675	0.159419	FALSE	grey
PMO003070	0.253953	0.357474	FALSE	grey
PMO003075	0.749726	0.103148	FALSE	grey
PMO003083	0.470484	0.230794	FALSE	grey
PMO003089	0.00828638	0.719927	TRUE	grey
PMO003105	0.995484	0.0018351	FALSE	grey
PMO003118	0.169433	0.424106	FALSE	grey
PMO003125	0.495805	0.21814	FALSE	grey
PMO003150	0.390337	0.273148	FALSE	grey
PMO003158	0.693856	0.127099	FALSE	grey
PMO003160	0.446394	0.243128	FALSE	grey
PMO003164	0.363546	0.288266	FALSE	grey
PMO003176	0.0274388	0.632093	TRUE	grey
PMO003196	0.270255	0.346235	FALSE	grey
PMO003202	0.780582	0.0901295	FALSE	grey
PMO003209	0.410746	0.261985	FALSE	grey
PMO003212	0.596828	0.170237	FALSE	grey
PMO003240	0.149708	0.44252	FALSE	grey
PMO003253	0.96692	0.0134452	FALSE	grey
PMO003256	0.670688	0.137201	FALSE	grey
PMO003262	0.415596	0.259374	FALSE	grey
PMO003284	0.824045	0.0719945	FALSE	grey
PMO003297	0.364469	0.287735	FALSE	grey
PMO003302	0.344097	0.29961	FALSE	grey
PMO003309	0.744888	0.105201	FALSE	grey
PMO003327	0.191851	0.404749	FALSE	grey
PMO003396	0.940988	0.0239978	FALSE	grey
PMO003421	0.525243	0.203788	FALSE	grey
PMO003433	0.847723	0.0621971	FALSE	grey
PMO003435	0.0961764	0.502168	FALSE	grey
PMO003445	0.200724	0.397477	FALSE	grey
PMO003459	0.304565	0.323789	FALSE	grey
PMO003465	0.0596143	0.557583	FALSE	grey
PMO003479	0.65476	0.144213	FALSE	grey
PMO003485	0.721789	0.115058	FALSE	grey
PMO003506	0.0184064	0.664529	TRUE	grey
PMO003510	0.725274	0.113565	FALSE	grey
PMO003523	0.223769	0.379461	FALSE	grey
PMO003556	0.795845	0.0837361	FALSE	grey
PMO003589	0.441869	0.24548	FALSE	grey
PMO003595	0.593649	0.171692	FALSE	grey
PMO003607	0.46388	0.234145	FALSE	grey
PMO003645	0.111771	0.482915	FALSE	grey
PMO003667	0.944927	0.0223937	FALSE	grey
PMO003690	0.0266402	0.634616	TRUE	grey
PMO003728	0.744681	0.105289	FALSE	grey
PMO003759	0.360283	0.290146	FALSE	grey
PMO003791	0.985574	0.00586225	FALSE	grey
PMO003825	0.0774099	0.528359	FALSE	grey
PMO003836	0.034083	0.612919	TRUE	grey
PMO003860	0.888997	0.045229	FALSE	grey
PMO003872	0.315289	0.317068	FALSE	grey
PMO003875	0.862165	0.0562457	FALSE	grey
PMO003882	0.602522	0.16764	FALSE	grey
PMO003894	0.0321733	0.618132	TRUE	grey
PMO003929	0.716269	0.117426	FALSE	grey
PMO003931	0.0809286	0.523143	FALSE	grey
PMO003952	0.155725	0.436748	FALSE	grey
PMO003971	0.457189	0.237563	FALSE	grey
PMO003974	0.192123	0.404523	FALSE	grey
PMO004015	0.65671	0.143351	FALSE	grey
PMO004022	0.115642	0.478416	FALSE	grey
PMO004023	0.361757	0.289296	FALSE	grey
PMO004027	0.609158	0.164624	FALSE	grey
PMO004029	0.163858	0.429166	FALSE	grey
PMO004044	0.82624	0.071084	FALSE	grey
PMO004051	0.35809	0.291415	FALSE	grey
PMO004052	0.174941	0.419209	FALSE	grey
PMO004089	0.111628	0.483082	FALSE	grey
PMO004116	0.06232	0.552782	FALSE	grey
PMO004127	0.281245	0.338877	FALSE	grey
PMO004147	0.909799	0.0367192	FALSE	grey
PMO004151	0.890077	0.0447868	FALSE	grey
PMO004187	0.0839201	0.518829	FALSE	grey
PMO004190	0.615697	0.161664	FALSE	grey
PMO004209	0.577368	0.179189	FALSE	grey
PMO004230	0.197243	0.400306	FALSE	grey
PMO004233	0.186908	0.408891	FALSE	grey
PMO004234	0.126041	0.466802	FALSE	grey
PMO004256	0.396643	0.269668	FALSE	grey
PMO004267	0.153874	0.438508	FALSE	grey
PMO004274	0.910829	0.0362982	FALSE	grey
PMO004278	0.508307	0.212	FALSE	grey
PMO004284	0.637238	0.151994	FALSE	grey
PMO004290	0.6048	0.166603	FALSE	grey
PMO004292	0.656981	0.143232	FALSE	grey
PMO004294	0.888907	0.0452658	FALSE	grey
PMO004327	0.215076	0.386118	FALSE	grey
PMO004355	0.489364	0.22133	FALSE	grey
PMO004358	0.84526	0.0632143	FALSE	grey
PMO004359	0.582973	0.176599	FALSE	grey
PMO004362	0.374133	0.282225	FALSE	grey
PMO004374	0.315598	0.316875	FALSE	grey
PMO004375	0.964337	0.0144957	FALSE	grey
PMO004380	0.080552	0.523694	FALSE	grey
PMO004397	0.0397935	0.598481	TRUE	grey
PMO004413	0.082058	0.521502	FALSE	grey
PMO004425	0.178161	0.41639	FALSE	grey
PMO004428	0.0324904	0.617251	TRUE	grey
PMO004471	0.448602	0.241985	FALSE	grey
PMO004483	0.764729	0.0968016	FALSE	grey
PMO004488	0.157579	0.434997	FALSE	grey
PMO004489	0.338763	0.302781	FALSE	grey
PMO004501	0.628877	0.155733	FALSE	grey
PMO004503	0.155763	0.436712	FALSE	grey
PMO004506	0.907233	0.0377674	FALSE	grey
PMO004507	0.169667	0.423896	FALSE	grey
PMO004510	0.68535	0.130796	FALSE	grey
PMO004526	0.271413	0.345451	FALSE	grey
PMO004545	0.871398	0.0524491	FALSE	grey
PMO004563	0.808559	0.0784318	FALSE	grey
PMO004566	0.699256	0.12476	FALSE	grey
PMO004578	0.160309	0.432445	FALSE	grey
PMO004600	0.406395	0.264341	FALSE	grey
PMO004603	0.661236	0.141355	FALSE	grey
PMO004618	0.988838	0.00453573	FALSE	grey
PMO004619	0.784623	0.0884338	FALSE	grey
PMO004624	0.464535	0.233811	FALSE	grey
PMO004628	0.86201	0.0563097	FALSE	grey
PMO004633	0.974673	0.0102931	FALSE	grey
PMO004638	0.918903	0.0330014	FALSE	grey
PMO004647	0.690978	0.128349	FALSE	grey
PMO004657	0.91186	0.0358773	FALSE	grey
PMO004681	0.0126462	0.692014	TRUE	grey
PMO004693	0.394195	0.271015	FALSE	grey
PMO004695	0.438637	0.247167	FALSE	grey
PMO004747	0.63879	0.151302	FALSE	grey
PMO004757	0.724014	0.114104	FALSE	grey
PMO004758	0.106618	0.489067	FALSE	grey
PMO004774	0.638713	0.151336	FALSE	grey
PMO004781	0.313805	0.31799	FALSE	grey
PMO004784	0.620267	0.159602	FALSE	grey
PMO004792	0.556273	0.189029	FALSE	grey
PMO004794	0.363634	0.288215	FALSE	grey
PMO004824	0.83087	0.069165	FALSE	grey
PMO004852	0.492683	0.219684	FALSE	grey
PMO004942	0.260905	0.352631	FALSE	grey
PMO004944	0.145483	0.446663	FALSE	grey
PMO004946	0.913649	0.0351464	FALSE	grey
PMO004947	0.61154	0.163544	FALSE	grey
PMO004949	0.300545	0.326342	FALSE	grey
PMO004991	0.622657	0.158526	FALSE	grey
PMO004997	0.21998	0.382343	FALSE	grey
PMO004998	0.19642	0.400979	FALSE	grey
PMO005013	0.659277	0.142219	FALSE	grey
PMO005041	0.0363323	0.60704	TRUE	grey
PMO005048	0.324804	0.311209	FALSE	grey
PMO005066	0.0868613	0.514688	FALSE	grey
PMO005079	0.197794	0.399856	FALSE	grey
PMO005080	0.118983	0.474613	FALSE	grey
PMO005086	0.144475	0.447663	FALSE	grey
PMO005093	0.300032	0.326669	FALSE	grey
PMO005119	0.00368232	0.765868	TRUE	grey
PMO005125	0.273121	0.3443	FALSE	grey
PMO005134	0.137175	0.455041	FALSE	grey
PMO005146	0.340206	0.30192	FALSE	grey
PMO005158	0.60846	0.16494	FALSE	grey
PMO005216	0.839595	0.0655546	FALSE	grey
PMO005232	0.280029	0.339683	FALSE	grey
PMO005239	0.152114	0.440194	FALSE	grey
PMO005245	0.771278	0.0940409	FALSE	grey
PMO005257	0.17418	0.419879	FALSE	grey
PMO005268	0.843099	0.0641064	FALSE	grey
PMO005274	0.494703	0.218685	FALSE	grey
PMO005303	0.602141	0.167813	FALSE	grey
PMO005304	0.976166	0.00968608	FALSE	grey
PMO005321	0.859478	0.057352	FALSE	grey
PMO005322	0.255332	0.356507	FALSE	grey
PMO005327	0.247525	0.362021	FALSE	grey
PMO005335	0.867866	0.0539007	FALSE	grey
PMO005342	0.133679	0.458665	FALSE	grey
PMO005346	0.891874	0.0440507	FALSE	grey
PMO005348	0.745226	0.105058	FALSE	grey
PMO005388	0.538113	0.197623	FALSE	grey
PMO005406	0.778146	0.0911527	FALSE	grey
PMO005421	0.970199	0.0121118	FALSE	grey
PMO005449	0.389259	0.273746	FALSE	grey
PMO005465	0.946696	0.0216736	FALSE	grey
PMO005492	0.871032	0.0525995	FALSE	grey
PMO005514	0.434043	0.249576	FALSE	grey
PMO005538	0.700524	0.124212	FALSE	grey
PMO005600	0.289175	0.33367	FALSE	grey
PMO005625	0.899409	0.0409665	FALSE	grey
PMO005640	0.245103	0.363752	FALSE	grey
PMO005649	0.165723	0.427462	FALSE	grey
PMO005671	0.0854198	0.516705	FALSE	grey
PMO005764	0.320567	0.313806	FALSE	grey
PMO005770	0.990906	0.00369537	FALSE	grey
PMO005784	0.746255	0.104621	FALSE	grey
PMO005786	0.123627	0.46944	FALSE	grey
PMO005787	0.366446	0.286602	FALSE	grey
PMO005789	0.00724753	0.728165	TRUE	grey
PMO005806	0.0459499	0.584483	TRUE	grey
PMO005813	0.42273	0.255559	FALSE	grey
PMO005818	0.754717	0.101033	FALSE	grey
PMO005842	0.442796	0.244998	FALSE	grey
PMO005863	0.991446	0.00347586	FALSE	grey
PMO005909	0.144221	0.447916	FALSE	grey
PMO005914	0.695633	0.126329	FALSE	grey
PMO005936	0.962591	0.0152056	FALSE	grey
PMO005955	0.0712024	0.53797	FALSE	grey
PMO005978	0.53917	0.19712	FALSE	grey
PMO006028	0.533325	0.199909	FALSE	grey
PMO006038	0.100513	0.496617	FALSE	grey
PMO006045	0.108021	0.487372	FALSE	grey
PMO006054	0.687453	0.129881	FALSE	grey
PMO006073	0.442456	0.245175	FALSE	grey
PMO006095	0.302868	0.324864	FALSE	grey
PMO006103	0.831289	0.0689914	FALSE	grey
PMO006117	0.446411	0.24312	FALSE	grey
PMO006123	0.321701	0.313109	FALSE	grey
PMO006136	0.550146	0.191916	FALSE	grey
PMO006150	0.806226	0.0794038	FALSE	grey
PMO006168	0.498777	0.216674	FALSE	grey
PMO006177	0.68824	0.129538	FALSE	grey
PMO006206	0.0224082	0.648987	TRUE	grey
PMO006224	0.180205	0.414618	FALSE	grey
PMO006232	0.358468	0.291196	FALSE	grey
PMO006251	0.398467	0.268667	FALSE	grey
PMO006257	0.0856541	0.516376	FALSE	grey
PMO006277	0.393216	0.271556	FALSE	grey
PMO006282	0.906083	0.0382376	FALSE	grey
PMO006301	0.765404	0.0965166	FALSE	grey
PMO006306	0.0744019	0.532947	FALSE	grey
PMO006318	0.250054	0.360224	FALSE	grey
PMO006341	0.757183	0.0999896	FALSE	grey
PMO006344	0.731429	0.110934	FALSE	grey
PMO006360	0.655632	0.143828	FALSE	grey
PMO006373	0.493974	0.219045	FALSE	grey
PMO006380	0.648106	0.147159	FALSE	grey
PMO006446	0.34184	0.300949	FALSE	grey
PMO006447	0.68133	0.132548	FALSE	grey
PMO006451	0.94859	0.0209025	FALSE	grey
PMO006462	0.42472	0.254502	FALSE	grey
PMO006463	0.0268041	0.634094	TRUE	grey
PMO006469	0.145564	0.446583	FALSE	grey
PMO006475	0.509434	0.21145	FALSE	grey
PMO006478	0.415703	0.259316	FALSE	grey
PMO006479	0.124868	0.468079	FALSE	grey
PMO006485	0.788437	0.0868355	FALSE	grey
PMO006491	0.346884	0.297964	FALSE	grey
PMO006496	0.820732	0.0733694	FALSE	grey
PMO006498	0.694725	0.126723	FALSE	grey
PMO006510	0.0324321	0.617413	TRUE	grey
PMO006520	0.651343	0.145725	FALSE	grey
PMO006536	0.512924	0.20975	FALSE	grey
PMO006537	0.818103	0.0744614	FALSE	grey
PMO006544	0.595964	0.170633	FALSE	grey
PMO006546	0.167447	0.425896	FALSE	grey
PMO006558	0.0327107	0.616643	TRUE	grey
PMO006559	0.491926	0.220059	FALSE	grey
PMO006575	0.596307	0.170476	FALSE	grey
PMO006576	0.142751	0.449384	FALSE	grey
PMO006597	0.174368	0.419714	FALSE	grey
PMO006607	0.742275	0.106312	FALSE	grey
PMO006634	0.114654	0.479555	FALSE	grey
PMO006646	0.868487	0.0536453	FALSE	grey
PMO006674	0.826976	0.070779	FALSE	grey
PMO006678	0.658984	0.142348	FALSE	grey
PMO006700	0.675842	0.134945	FALSE	grey
PMO006712	0.72833	0.112258	FALSE	grey
PMO006735	0.152635	0.439694	FALSE	grey
PMO006741	0.891462	0.0442192	FALSE	grey
PMO006767	0.559391	0.187566	FALSE	grey
PMO006777	0.080057	0.52442	FALSE	grey
PMO006809	0.126276	0.466547	FALSE	grey
PMO006826	0.0173151	0.669193	TRUE	grey
PMO006828	0.0977448	0.500141	FALSE	grey
PMO006842	0.591506	0.172674	FALSE	grey
PMO006846	0.359292	0.290719	FALSE	grey
PMO006849	0.340118	0.301973	FALSE	grey
PMO006943	0.247157	0.362284	FALSE	grey
PMO006952	0.0415479	0.594344	TRUE	grey
PMO006956	0.501117	0.215523	FALSE	grey
PMO006983	0.0713162	0.537788	FALSE	grey
PMO007010	0.187714	0.408211	FALSE	grey
PMO007019	0.236245	0.370172	FALSE	grey
PMO007021	0.445642	0.243518	FALSE	grey
PMO007023	0.913866	0.035058	FALSE	grey
PMO007040	0.315803	0.316749	FALSE	grey
PMO007048	0.194052	0.402926	FALSE	grey
PMO007074	0.101476	0.495406	FALSE	grey
PMO007097	0.948875	0.0207866	FALSE	grey
PMO007104	0.0189776	0.662168	TRUE	grey
PMO007105	0.46659	0.232767	FALSE	grey
PMO007106	0.0432031	0.590553	TRUE	grey
PMO007107	0.39054	0.273035	FALSE	grey
PMO007113	0.0574176	0.561593	FALSE	grey
PMO007123	0.124506	0.468475	FALSE	grey
PMO007149	0.332127	0.306763	FALSE	grey
PMO007150	0.679355	0.13341	FALSE	grey
PMO007163	0.308867	0.321077	FALSE	grey
PMO007176	0.582081	0.177011	FALSE	grey
PMO007215	0.374151	0.282215	FALSE	grey
PMO007233	0.606825	0.165683	FALSE	grey
PMO007235	0.245249	0.363648	FALSE	grey
PMO007244	0.0317787	0.619237	TRUE	grey
PMO007250	0.390447	0.273087	FALSE	grey
PMO007257	0.348935	0.296757	FALSE	grey
PMO007259	0.687951	0.129664	FALSE	grey
PMO007270	0.739711	0.107403	FALSE	grey
PMO007284	0.705519	0.122054	FALSE	grey
PMO007286	0.116409	0.477537	FALSE	grey
PMO007289	0.0417486	0.593879	TRUE	grey
PMO007299	0.857043	0.0583545	FALSE	grey
PMO007301	0.971553	0.0115615	FALSE	grey
PMO007316	0.352497	0.29467	FALSE	grey
PMO007327	0.168029	0.425371	FALSE	grey
PMO007348	0.0927588	0.506662	FALSE	grey
PMO007349	0.814003	0.0761656	FALSE	grey
PMO007355	0.0598651	0.557131	FALSE	grey
PMO007356	0.0680826	0.543019	FALSE	grey
PMO007367	0.813035	0.0765684	FALSE	grey
PMO007369	0.00858494	0.717704	TRUE	grey
PMO007374	0.769448	0.0948117	FALSE	grey
PMO007375	0.911617	0.0359764	FALSE	grey
PMO007407	0.100286	0.496903	FALSE	grey
PMO007420	0.653425	0.144803	FALSE	grey
PMO007441	0.22401	0.379278	FALSE	grey
PMO007477	0.812621	0.0767408	FALSE	grey
PMO007481	0.550855	0.191581	FALSE	grey
PMO007488	0.361886	0.289221	FALSE	grey
PMO007491	1	6.93889e-18	FALSE	grey
PMO007504	0.567995	0.183543	FALSE	grey
PMO007508	0.335262	0.304876	FALSE	grey
PMO007530	0.039932	0.59815	TRUE	grey
PMO007545	0.182263	0.412846	FALSE	grey
PMO007563	0.00161365	0.804225	TRUE	grey
PMO007568	0.972166	0.0113123	FALSE	grey
PMO007577	0.474707	0.228662	FALSE	grey
PMO007599	0.937112	0.0255768	FALSE	grey
PMO007610	0.425797	0.25393	FALSE	grey
PMO007612	0.246404	0.362821	FALSE	grey
PMO007616	0.494703	0.218685	FALSE	grey
PMO007652	0.732879	0.110315	FALSE	grey
PMO007682	0.85474	0.0593036	FALSE	grey
PMO007714	0.993358	0.00269902	FALSE	grey
PMO007719	0.322978	0.312325	FALSE	grey
PMO007724	0.0340815	0.612923	TRUE	grey
PMO007725	0.50295	0.214623	FALSE	grey
PMO007762	0.0652693	0.547711	FALSE	grey
PMO007767	0.0122946	0.693972	TRUE	grey
PMO007776	0.255798	0.356181	FALSE	grey
PMO007786	0.342554	0.300525	FALSE	grey
PMO007791	0.511865	0.210265	FALSE	grey
PMO007797	0.136523	0.455712	FALSE	grey
PMO007810	0.185961	0.409692	FALSE	grey
PMO007842	0.157141	0.43541	FALSE	grey
PMO007892	0.463683	0.234245	FALSE	grey
PMO007894	0.853174	0.0599488	FALSE	grey
PMO007920	0.0071645	0.72886	TRUE	grey
PMO007934	0.144993	0.447149	FALSE	grey
PMO007937	0.576261	0.179702	FALSE	grey
PMO007962	0.0238987	0.643717	TRUE	grey
PMO007976	0.378751	0.279618	FALSE	grey
PMO007990	0.304706	0.323699	FALSE	grey
PMO008032	0.79068	0.0858964	FALSE	grey
PMO008063	0.243362	0.365003	FALSE	grey
PMO008069	0.590977	0.172917	FALSE	grey
PMO008099	0.729833	0.111616	FALSE	grey
PMO008101	0.0696531	0.540458	FALSE	grey
PMO008105	0.305355	0.323289	FALSE	grey
PMO008108	0.105885	0.489958	FALSE	grey
PMO008151	0.832662	0.068423	FALSE	grey
PMO008243	0.887782	0.0457268	FALSE	grey
PMO008284	0.401455	0.267032	FALSE	grey
PMO008305	0.501015	0.215573	FALSE	grey
PMO008313	0.115253	0.478863	FALSE	grey
PMO008326	0.248478	0.361343	FALSE	grey
PMO008337	0.687689	0.129778	FALSE	grey
PMO008340	0.846229	0.0628142	FALSE	grey
PMO008354	0.483036	0.224483	FALSE	grey
PMO008358	0.563644	0.185574	FALSE	grey
PMO008370	0.679844	0.133196	FALSE	grey
PMO008374	0.206824	0.39259	FALSE	grey
PMO008377	0.155082	0.437358	FALSE	grey
PMO008389	0.972173	0.0113092	FALSE	grey
PMO008396	0.806553	0.0792675	FALSE	grey
PMO008404	0.655439	0.143913	FALSE	grey
PMO008407	0.988325	0.0047441	FALSE	grey
PMO008417	0.380297	0.278748	FALSE	grey
PMO008430	0.595717	0.170745	FALSE	grey
PMO008459	0.15375	0.438627	FALSE	grey
PMO008483	0.688232	0.129542	FALSE	grey
PMO008493	0.859358	0.0574011	FALSE	grey
PMO008509	0.411752	0.261442	FALSE	grey
PMO008517	0.158213	0.434403	FALSE	grey
PMO008519	0.0581896	0.560172	FALSE	grey
PMO008522	0.234544	0.371421	FALSE	grey
PMO008526	0.45075	0.240875	FALSE	grey
PMO008545	0.590051	0.173342	FALSE	grey
PMO008567	0.274307	0.343502	FALSE	grey
PMO008576	0.883433	0.0475096	FALSE	grey
PMO008585	0.403455	0.26594	FALSE	grey
PMO008591	0.000158596	0.880171	TRUE	grey
PMO008608	0.864037	0.0554756	FALSE	grey
PMO008620	0.392078	0.272184	FALSE	grey
PMO008623	0.679886	0.133178	FALSE	grey
PMO008627	0.597865	0.169764	FALSE	grey
PMO008628	0.515505	0.208496	FALSE	grey
PMO008632	0.724402	0.113938	FALSE	grey
PMO008652	0.853337	0.0598816	FALSE	grey
PMO008653	0.634801	0.153082	FALSE	grey
PMO008655	0.0611587	0.554824	FALSE	grey
PMO008661	0.212251	0.388316	FALSE	grey
PMO008669	0.99237	0.0031003	FALSE	grey
PMO008675	0.777033	0.0916203	FALSE	grey
PMO008680	0.136808	0.455419	FALSE	grey
PMO008726	0.691148	0.128274	FALSE	grey
PMO008727	0.766783	0.095935	FALSE	grey
PMO008772	0.901907	0.039945	FALSE	grey
PMO008783	0.285675	0.335958	FALSE	grey
PMO008804	0.0268214	0.634039	TRUE	grey
PMO008831	0.984775	0.00618691	FALSE	grey
PMO008833	0.585084	0.175626	FALSE	grey
PMO008839	0.379699	0.279084	FALSE	grey
PMO008868	0.736573	0.10874	FALSE	grey
PMO008905	0.315618	0.316863	FALSE	grey
PMO008913	0.810805	0.0774964	FALSE	grey
PMO008917	0.237885	0.368973	FALSE	grey
PMO008935	0.540352	0.196557	FALSE	grey
PMO008942	0.167115	0.426197	FALSE	grey
PMO008951	0.573472	0.180996	FALSE	grey
PMO008971	0.603877	0.167023	FALSE	grey
PMO008997	0.73099	0.111121	FALSE	grey
PMO009012	0.310547	0.320024	FALSE	grey
PMO009037	0.638625	0.151375	FALSE	grey
PMO009059	0.488216	0.221901	FALSE	grey
PMO009068	0.778182	0.0911374	FALSE	grey
PMO009072	0.931744	0.0277645	FALSE	grey
PMO009073	0.623459	0.158166	FALSE	grey
PMO009081	0.688355	0.129488	FALSE	grey
PMO009088	0.0229521	0.647035	TRUE	grey
PMO009095	0.170249	0.423375	FALSE	grey
PMO009100	0.393517	0.271389	FALSE	grey
PMO009103	0.0439167	0.58895	TRUE	grey
PMO009114	0.0188444	0.662714	TRUE	grey
PMO009135	0.0995751	0.497803	FALSE	grey
PMO009137	0.000900336	0.827218	TRUE	grey
PMO009141	0.102046	0.494692	FALSE	grey
PMO009143	0.846407	0.0627405	FALSE	grey
PMO009147	0.253304	0.35793	FALSE	grey
PMO009159	0.512084	0.210158	FALSE	grey
PMO009167	0.0858803	0.516058	FALSE	grey
PMO009170	0.811331	0.0772775	FALSE	grey
PMO009175	0.903496	0.0392949	FALSE	grey
PMO009177	0.895991	0.0423654	FALSE	grey
PMO009179	0.675622	0.135041	FALSE	grey
PMO009206	0.496586	0.217754	FALSE	grey
PMO009227	0.0612891	0.554594	FALSE	grey
PMO009234	0.958769	0.0167606	FALSE	grey
PMO009255	0.521154	0.20576	FALSE	grey
PMO009291	0.0769361	0.529073	FALSE	grey
PMO009324	0.025438	0.638519	TRUE	grey
PMO009352	0.58705	0.174721	FALSE	grey
PMO009362	0.783397	0.0889483	FALSE	grey
PMO009371	0.92945	0.0286996	FALSE	grey
PMO009378	0.179544	0.415189	FALSE	grey
PMO009385	0.198088	0.399616	FALSE	grey
PMO009395	0.878586	0.0494979	FALSE	grey
PMO009412	0.296154	0.329153	FALSE	grey
PMO009444	0.572844	0.181287	FALSE	grey
PMO009445	0.415422	0.259467	FALSE	grey
PMO009482	0.145232	0.446911	FALSE	grey
PMO009483	0.905423	0.0385073	FALSE	grey
PMO009496	0.845261	0.0632136	FALSE	grey
PMO009501	0.563477	0.185652	FALSE	grey
PMO009541	0.0719309	0.536813	FALSE	grey
PMO009556	0.616618	0.161248	FALSE	grey
PMO009572	0.602944	0.167447	FALSE	grey
PMO009577	0.46585	0.233143	FALSE	grey
PMO009592	0.562903	0.185921	FALSE	grey
PMO009598	0.0362266	0.60731	TRUE	grey
PMO009615	0.785962	0.0878725	FALSE	grey
PMO009703	0.494265	0.218901	FALSE	grey
PMO009712	0.0458324	0.584737	TRUE	grey
PMO009716	0.626372	0.156857	FALSE	grey
PMO009719	0.695199	0.126517	FALSE	grey
PMO009721	0.49338	0.219339	FALSE	grey
PMO009726	0.604939	0.16654	FALSE	grey
PMO009740	0.919952	0.0325735	FALSE	grey
PMO009747	0.342759	0.300403	FALSE	grey
PMO009795	0.541989	0.195779	FALSE	grey
PMO009810	0.750896	0.102652	FALSE	grey
PMO009825	0.121851	0.471403	FALSE	grey
PMO009838	0.4763	0.22786	FALSE	grey
PMO009877	0.925073	0.0304842	FALSE	grey
PMO009882	0.601268	0.168211	FALSE	grey
PMO009901	0.351259	0.295394	FALSE	grey
PMO009906	0.128569	0.464074	FALSE	grey
PMO009908	0.277297	0.341501	FALSE	grey
PMO009913	0.136947	0.455276	FALSE	grey
PMO009923	0.573997	0.180752	FALSE	grey
PMO009927	0.333934	0.305674	FALSE	grey
PMO009928	0.632169	0.154259	FALSE	grey
PMO009968	0.370233	0.28444	FALSE	grey
PMO009969	0.482067	0.224967	FALSE	grey
PMO009984	0.964138	0.0145767	FALSE	grey
PMO009987	0.806875	0.0791332	FALSE	grey
PMO010004	0.151624	0.440666	FALSE	grey
PMO010044	0.516023	0.208244	FALSE	grey
PMO010058	0.904802	0.0387614	FALSE	grey
PMO010084	0.739641	0.107433	FALSE	grey
PMO010086	0.123735	0.469322	FALSE	grey
PMO010104	0.000948781	0.825276	TRUE	grey
PMO010105	0.246005	0.363107	FALSE	grey
PMO010110	0.415502	0.259424	FALSE	grey
PMO010112	0.208161	0.391531	FALSE	grey
PMO010200	0.571014	0.182138	FALSE	grey
PMO010220	0.649566	0.146512	FALSE	grey
PMO010244	0.762022	0.0979442	FALSE	grey
PMO010247	0.75614	0.100431	FALSE	grey
PMO010249	0.599026	0.169234	FALSE	grey
PMO010252	0.740706	0.10698	FALSE	grey
PMO010282	0.68158	0.132438	FALSE	grey
PMO010292	0.472297	0.229877	FALSE	grey
PMO010323	0.155788	0.436688	FALSE	grey
PMO010352	0.848769	0.0617655	FALSE	grey
PMO010357	0.525951	0.203447	FALSE	grey
PMO010360	0.59568	0.170762	FALSE	grey
PMO010366	0.692927	0.127502	FALSE	grey
PMO010369	0.994431	0.00226308	FALSE	grey
PMO010405	0.290905	0.332545	FALSE	grey
PMO010430	0.326294	0.3103	FALSE	grey
PMO010441	0.932576	0.0274252	FALSE	grey
PMO010442	0.0955745	0.502951	FALSE	grey
PMO010448	0.193698	0.403218	FALSE	grey
PMO010455	0.919906	0.0325921	FALSE	grey
PMO010483	0.788769	0.0866967	FALSE	grey
PMO010505	0.80197	0.0811783	FALSE	grey
PMO010507	0.352221	0.294831	FALSE	grey
PMO010508	0.258093	0.354581	FALSE	grey
PMO010509	0.558107	0.188168	FALSE	grey
PMO010536	0.213082	0.387668	FALSE	grey
PMO010546	0.497629	0.21724	FALSE	grey
PMO010566	0.918901	0.0330025	FALSE	grey
PMO010589	0.971913	0.0114151	FALSE	grey
PMO010591	0.316336	0.316418	FALSE	grey
PMO010597	0.287861	0.334527	FALSE	grey
PMO010610	0.749405	0.103284	FALSE	grey
PMO010632	0.877981	0.0497462	FALSE	grey
PMO010655	0.657638	0.142942	FALSE	grey
PMO010669	0.636094	0.152504	FALSE	grey
PMO010673	0.743743	0.105688	FALSE	grey
PMO010702	0.790953	0.085782	FALSE	grey
PMO010705	0.100483	0.496654	FALSE	grey
PMO010712	0.727132	0.11277	FALSE	grey
PMO010723	0.97254	0.01116	FALSE	grey
PMO010738	0.625569	0.157217	FALSE	grey
PMO010741	0.546993	0.193406	FALSE	grey
PMO010755	0.452967	0.239732	FALSE	grey
PMO010757	0.532046	0.200521	FALSE	grey
PMO010765	0.692898	0.127515	FALSE	grey
PMO010769	0.625047	0.157451	FALSE	grey
PMO010782	0.822622	0.072585	FALSE	grey
PMO010852	0.521236	0.20572	FALSE	grey
PMO010865	0.29909	0.327271	FALSE	grey
PMO010871	0.393902	0.271177	FALSE	grey
PMO010888	0.235387	0.370801	FALSE	grey
PMO010894	0.680867	0.132749	FALSE	grey
PMO010902	0.508828	0.211746	FALSE	grey
PMO010903	0.578141	0.178831	FALSE	grey
PMO010911	0.173643	0.420354	FALSE	grey
PMO010918	0.06419	0.549548	FALSE	grey
PMO010919	0.692019	0.127897	FALSE	grey
PMO010922	0.385678	0.275738	FALSE	grey
PMO010924	0.366696	0.286459	FALSE	grey
PMO010925	0.401322	0.267104	FALSE	grey
PMO010949	0.222088	0.380736	FALSE	grey
PMO010966	0.297478	0.328303	FALSE	grey
PMO010970	0.916758	0.033877	FALSE	grey
PMO011003	0.184377	0.411038	FALSE	grey
PMO011014	0.0640972	0.549707	FALSE	grey
PMO011029	0.522841	0.204946	FALSE	grey
PMO011049	0.683118	0.131768	FALSE	grey
PMO011055	0.469679	0.231201	FALSE	grey
PMO011063	0.47273	0.229659	FALSE	grey
PMO011075	0.561348	0.186648	FALSE	grey
PMO011082	0.548025	0.192918	FALSE	grey
PMO011089	0.716674	0.117252	FALSE	grey
PMO011090	0.32299	0.312318	FALSE	grey
PMO011151	0.772164	0.0936681	FALSE	grey
PMO011154	0.309409	0.320737	FALSE	grey
PMO011159	0.752623	0.10192	FALSE	grey
PMO011255	0.0867748	0.514808	FALSE	grey
PMO011260	0.305984	0.322892	FALSE	grey
PMO011264	0.424838	0.254439	FALSE	grey
PMO011272	0.707576	0.121167	FALSE	grey
PMO011293	0.823295	0.0723057	FALSE	grey
PMO011298	0.0580629	0.560404	FALSE	grey
PMO011305	0.979347	0.00839308	FALSE	grey
PMO011325	0.571502	0.181911	FALSE	grey
PMO011338	0.14909	0.443122	FALSE	grey
PMO011352	0.143772	0.448363	FALSE	grey
PMO011361	0.0356788	0.60872	TRUE	grey
PMO011379	0.936375	0.0258772	FALSE	grey
PMO011415	0.468059	0.232022	FALSE	grey
PMO011459	0.189441	0.40676	FALSE	grey
PMO011472	0.102513	0.49411	FALSE	grey
PMO011523	0.575811	0.179911	FALSE	grey
PMO011550	0.00713596	0.729101	TRUE	grey
PMO011567	0.953618	0.0188561	FALSE	grey
PMO011669	0.74267	0.106144	FALSE	grey
PMO011695	0.18805	0.407928	FALSE	grey
PMO011730	0.691593	0.128081	FALSE	grey
PMO011731	0.669417	0.137759	FALSE	grey
PMO011738	0.612327	0.163188	FALSE	grey
PMO011743	0.671802	0.136713	FALSE	grey
PMO011765	0.68729	0.129951	FALSE	grey
PMO011773	0.188864	0.407244	FALSE	grey
PMO011781	0.465941	0.233097	FALSE	grey
PMO011797	0.987569	0.00505146	FALSE	grey
PMO011818	0.320307	0.313966	FALSE	grey
PMO011819	0.517167	0.20769	FALSE	grey
PMO011856	0.470636	0.230716	FALSE	grey
PMO011875	0.994372	0.00228698	FALSE	grey
PMO011877	0.844655	0.0634641	FALSE	grey
PMO011891	0.178105	0.416439	FALSE	grey
PMO011915	0.118586	0.47506	FALSE	grey
PMO011916	0.0815768	0.522199	FALSE	grey
PMO011929	0.16161	0.431238	FALSE	grey
PMO011933	0.631163	0.154709	FALSE	grey
PMO011951	0.0197331	0.659125	TRUE	grey
PMO011952	0.71829	0.116558	FALSE	grey
PMO011968	0.822939	0.0724533	FALSE	grey
PMO011972	0.32183	0.313029	FALSE	grey
PMO011983	0.664857	0.139762	FALSE	grey
PMO011991	0.723051	0.114517	FALSE	grey
PMO011998	0.554881	0.189684	FALSE	grey
PMO012003	0.0396346	0.598862	TRUE	grey
PMO012004	0.739616	0.107443	FALSE	grey
PMO012005	0.893085	0.0435547	FALSE	grey
PMO012006	0.936862	0.0256788	FALSE	grey
PMO012013	0.701997	0.123575	FALSE	grey
PMO012019	0.454565	0.23891	FALSE	grey
PMO012027	0.0844227	0.518114	FALSE	grey
PMO012029	0.0773612	0.528432	FALSE	grey
PMO012041	0.0190835	0.661737	TRUE	grey
PMO012050	0.234164	0.371701	FALSE	grey
PMO012053	0.466428	0.232849	FALSE	grey
PMO012066	0.363751	0.288148	FALSE	grey
PMO012079	0.303618	0.324389	FALSE	grey
PMO012128	0.330379	0.30782	FALSE	grey
PMO012138	0.944948	0.0223854	FALSE	grey
PMO012151	0.882554	0.0478703	FALSE	grey
PMO012157	0.373826	0.282399	FALSE	grey
PMO012162	0.23865	0.368415	FALSE	grey
PMO012189	0.715551	0.117734	FALSE	grey
PMO012195	0.0873948	0.513947	FALSE	grey
PMO012221	0.191757	0.404827	FALSE	grey
PMO012223	0.0900783	0.510266	FALSE	grey
PMO012269	0.895683	0.0424913	FALSE	grey
PMO012279	0.739858	0.10734	FALSE	grey
PMO012284	0.639178	0.151128	FALSE	grey
PMO012301	0.721809	0.115049	FALSE	grey
PMO012303	0.182473	0.412666	FALSE	grey
PMO012323	0.70171	0.123699	FALSE	grey
PMO012330	0.506959	0.212659	FALSE	grey
PMO012332	0.99118	0.00358393	FALSE	grey
PMO012345	0.478052	0.22698	FALSE	grey
PMO012349	0.394313	0.270951	FALSE	grey
PMO012352	0.974259	0.0104612	FALSE	grey
PMO012364	0.537101	0.198106	FALSE	grey
PMO012366	0.471081	0.230492	FALSE	grey
PMO012367	0.708017	0.120977	FALSE	grey
PMO012371	0.734326	0.109698	FALSE	grey
PMO012383	0.700123	0.124385	FALSE	grey
PMO012398	0.935898	0.0260714	FALSE	grey
PMO012404	0.832087	0.0686609	FALSE	grey
PMO012405	0.446911	0.24286	FALSE	grey
PMO012407	0.178244	0.416318	FALSE	grey
PMO012413	0.553337	0.190411	FALSE	grey
PMO012415	0.751325	0.10247	FALSE	grey
PMO012433	0.755884	0.100539	FALSE	grey
PMO012440	0.176063	0.418223	FALSE	grey
PMO012444	0.938362	0.0250676	FALSE	grey
PMO012449	0.874723	0.0510835	FALSE	grey
PMO012450	0.825882	0.0712323	FALSE	grey
PMO012455	0.071663	0.537237	FALSE	grey
PMO012489	0.742545	0.106198	FALSE	grey
PMO012499	0.791722	0.0854604	FALSE	grey
PMO012500	0.350557	0.295805	FALSE	grey
PMO012502	0.0765921	0.529594	FALSE	grey
PMO012520	0.13667	0.455561	FALSE	grey
PMO012529	0.115178	0.47895	FALSE	grey
PMO012535	0.105912	0.489925	FALSE	grey
PMO012538	0.00366014	0.766177	TRUE	grey
PMO012555	0.76408	0.0970753	FALSE	grey
PMO012560	0.938618	0.0249634	FALSE	grey
PMO012566	0.190543	0.405839	FALSE	grey
PMO012567	0.200394	0.397743	FALSE	grey
PMO012579	0.560919	0.186849	FALSE	grey
PMO012601	0.179447	0.415274	FALSE	grey
PMO012603	0.718202	0.116596	FALSE	grey
PMO012611	0.792836	0.0849944	FALSE	grey
PMO012621	0.171388	0.422356	FALSE	grey
PMO012626	0.968119	0.0129579	FALSE	grey
PMO012636	0.122404	0.470789	FALSE	grey
PMO012638	0.383429	0.276994	FALSE	grey
PMO012641	0.788444	0.0868327	FALSE	grey
PMO012651	0.754925	0.100945	FALSE	grey
PMO012672	0.203543	0.395208	FALSE	grey
PMO012697	0.0663837	0.545836	FALSE	grey
PMO012701	0.571669	0.181833	FALSE	grey
PMO012703	0.3396	0.302281	FALSE	grey
PMO012708	0.428589	0.252451	FALSE	grey
PMO012724	0.398706	0.268536	FALSE	grey
PMO012728	0.0551311	0.565883	FALSE	grey
PMO012739	0.16165	0.431201	FALSE	grey
PMO012740	0.399827	0.267921	FALSE	grey
PMO012759	0.762133	0.0978972	FALSE	grey
PMO012771	0.651309	0.14574	FALSE	grey
PMO012774	0.424407	0.254668	FALSE	grey
PMO012781	0.101518	0.495353	FALSE	grey
PMO012789	0.744853	0.105216	FALSE	grey
PMO012798	0.496505	0.217795	FALSE	grey
PMO012800	0.32979	0.308176	FALSE	grey
PMO012803	0.0538525	0.568336	FALSE	grey
PMO012811	0.137021	0.4552	FALSE	grey
PMO012817	0.0496343	0.57673	TRUE	grey
PMO012828	0.890203	0.0447352	FALSE	grey
PMO012838	0.16828	0.425144	FALSE	grey
PMO012849	0.860732	0.0568357	FALSE	grey
PMO012871	0.870094	0.0529852	FALSE	grey
PMO012901	0.0711637	0.538032	FALSE	grey
PMO012903	0.175001	0.419156	FALSE	grey
PMO012952	0.526361	0.20325	FALSE	grey
PMO012969	0.800652	0.0817284	FALSE	grey
PMO012983	0.518838	0.20688	FALSE	grey
PMO012995	0.637363	0.151938	FALSE	grey
PMO013007	0.706259	0.121735	FALSE	grey
PMO013033	0.272891	0.344455	FALSE	grey
PMO013048	0.0462175	0.583905	TRUE	grey
PMO013049	0.547832	0.193009	FALSE	grey
PMO013058	0.965791	0.0139044	FALSE	grey
PMO013067	0.0170494	0.670361	TRUE	grey
PMO013070	0.360445	0.290052	FALSE	grey
PMO013084	0.626342	0.15687	FALSE	grey
PMO013106	0.868019	0.0538378	FALSE	grey
PMO013135	0.920802	0.0322266	FALSE	grey
PMO013137	0.90934	0.0369064	FALSE	grey
PMO013158	0.763556	0.0972967	FALSE	grey
PMO013171	0.749276	0.103339	FALSE	grey
PMO013181	0.919726	0.0326657	FALSE	grey
PMO013184	0.0541514	0.567759	FALSE	grey
PMO013232	0.534357	0.199416	FALSE	grey
PMO013250	0.330686	0.307634	FALSE	grey
PMO013293	0.82733	0.0706322	FALSE	grey
PMO013325	0.775423	0.0922969	FALSE	grey
PMO013360	0.624722	0.157597	FALSE	grey
PMO013392	0.660173	0.141824	FALSE	grey
PMO013450	0.908319	0.0373239	FALSE	grey
PMO013482	0.150833	0.44143	FALSE	grey
PMO013486	0.0773182	0.528497	FALSE	grey
PMO013501	0.0302656	0.623567	TRUE	grey
PMO013505	0.0205187	0.656049	TRUE	grey
PMO013518	0.528056	0.202435	FALSE	grey
PMO013539	0.719812	0.115905	FALSE	grey
PMO013544	0.839642	0.0655351	FALSE	grey
PMO013547	0.912662	0.0355496	FALSE	grey
PMO013572	0.37569	0.281344	FALSE	grey
PMO013575	0.603801	0.167057	FALSE	grey
PMO013576	0.641541	0.150076	FALSE	grey
PMO013602	0.369258	0.284995	FALSE	grey
PMO013608	0.850715	0.0609629	FALSE	grey
PMO013626	0.0853966	0.516738	FALSE	grey
PMO013649	0.751903	0.102225	FALSE	grey
PMO013650	0.405085	0.265053	FALSE	grey
PMO013657	0.0113603	0.699384	TRUE	grey
PMO013659	0.915616	0.0343432	FALSE	grey
PMO013666	0.655454	0.143906	FALSE	grey
PMO013669	0.867739	0.0539531	FALSE	grey
PMO013672	0.0833743	0.519608	FALSE	grey
PMO013685	0.874777	0.0510612	FALSE	grey
PMO013687	0.658046	0.142762	FALSE	grey
PMO013690	0.465785	0.233176	FALSE	grey
PMO013724	0.080058	0.524419	FALSE	grey
PMO013744	0.0444979	0.587659	TRUE	grey
PMO013746	0.479121	0.226443	FALSE	grey
PMO013759	0.220864	0.381668	FALSE	grey
PMO013761	0.424769	0.254476	FALSE	grey
PMO013806	0.227668	0.376525	FALSE	grey
PMO013825	0.921113	0.0320999	FALSE	grey
PMO013837	0.936471	0.0258377	FALSE	grey
PMO013838	0.619808	0.159809	FALSE	grey
PMO013850	0.90215	0.0398454	FALSE	grey
PMO013852	0.00178104	0.800019	TRUE	grey
PMO013854	0.0173623	0.668987	TRUE	grey
PMO013860	0.695766	0.126272	FALSE	grey
PMO013863	0.389531	0.273595	FALSE	grey
PMO013866	0.773462	0.0931217	FALSE	grey
PMO013869	0.0114503	0.698848	TRUE	grey
PMO013875	0.23577	0.37052	FALSE	grey
PMO013881	0.204539	0.39441	FALSE	grey
PMO013886	0.900241	0.0406261	FALSE	grey
PMO013891	0.0413727	0.594752	TRUE	grey
PMO013916	0.8747	0.0510929	FALSE	grey
PMO013959	0.868722	0.053549	FALSE	grey
PMO013966	0.91442	0.0348317	FALSE	grey
PMO013992	0.788043	0.0870007	FALSE	grey
PMO013998	0.148149	0.44404	FALSE	grey
PMO014038	0.83639	0.06688	FALSE	grey
PMO014086	0.0262902	0.635739	TRUE	grey
PMO014106	0.325136	0.311006	FALSE	grey
PMO014108	0.555011	0.189623	FALSE	grey
PMO014113	0.0065678	0.734047	TRUE	grey
PMO014118	0.30705	0.32222	FALSE	grey
PMO014125	0.95344	0.0189286	FALSE	grey
PMO014131	0.869306	0.0533088	FALSE	grey
PMO014160	0.421645	0.256138	FALSE	grey
PMO014171	0.302052	0.325383	FALSE	grey
PMO014186	0.149534	0.442689	FALSE	grey
PMO014190	0.712763	0.118933	FALSE	grey
PMO014218	0.808027	0.0786533	FALSE	grey
PMO014220	0.228681	0.375768	FALSE	grey
PMO014234	0.23674	0.369809	FALSE	grey
PMO014238	0.79306	0.0849007	FALSE	grey
PMO014259	0.784881	0.088326	FALSE	grey
PMO014264	0.423585	0.255105	FALSE	grey
PMO014265	0.0946767	0.504127	FALSE	grey
PMO014277	0.670847	0.137132	FALSE	grey
PMO014293	0.186425	0.4093	FALSE	grey
PMO014299	0.312811	0.318609	FALSE	grey
PMO014312	0.486772	0.22262	FALSE	grey
PMO014315	0.251345	0.359311	FALSE	grey
PMO014323	0.279656	0.339931	FALSE	grey
PMO014342	0.107382	0.488143	FALSE	grey
PMO014346	0.000778538	0.832483	TRUE	grey
PMO014363	0.266872	0.348534	FALSE	grey
PMO014382	0.330927	0.307488	FALSE	grey
PMO014407	0.0528433	0.570301	FALSE	grey
PMO014422	0.483626	0.224188	FALSE	grey
PMO014436	0.226291	0.377559	FALSE	grey
PMO014441	0.685504	0.130729	FALSE	grey
PMO014449	0.016749	0.671697	TRUE	grey
PMO014504	0.389547	0.273586	FALSE	grey
PMO014518	0.0921294	0.507502	FALSE	grey
PMO014521	0.912203	0.0357372	FALSE	grey
PMO014523	0.182707	0.412465	FALSE	grey
PMO014524	0.160216	0.432531	FALSE	grey
PMO014526	0.295088	0.329839	FALSE	grey
PMO014529	0.0660304	0.546428	FALSE	grey
PMO014531	0.706739	0.121528	FALSE	grey
PMO014558	0.601309	0.168192	FALSE	grey
PMO014576	0.553942	0.190126	FALSE	grey
PMO014581	0.0804891	0.523786	FALSE	grey
PMO014582	0.0455832	0.585278	TRUE	grey
PMO014590	0.0148565	0.680551	TRUE	grey
PMO014612	0.51167	0.21036	FALSE	grey
PMO014619	0.529394	0.201793	FALSE	grey
PMO014630	0.42994	0.251737	FALSE	grey
PMO014631	0.245562	0.363423	FALSE	grey
PMO014634	0.846598	0.0626616	FALSE	grey
PMO014655	0.249	0.360972	FALSE	grey
PMO014656	0.452017	0.240222	FALSE	grey
PMO014657	0.650922	0.145911	FALSE	grey
PMO014679	0.511946	0.210226	FALSE	grey
PMO014685	0.77524	0.0923738	FALSE	grey
PMO014697	0.330302	0.307866	FALSE	grey
PMO014698	0.915064	0.0345687	FALSE	grey
PMO014699	0.0816235	0.522131	FALSE	grey
PMO014714	0.5571	0.188641	FALSE	grey
PMO014732	0.201713	0.396678	FALSE	grey
PMO014740	0.839802	0.065469	FALSE	grey
PMO014751	0.0164368	0.673105	TRUE	grey
PMO014752	0.101031	0.495964	FALSE	grey
PMO014770	0.582514	0.176811	FALSE	grey
PMO014798	0.0168781	0.671121	TRUE	grey
PMO014804	0.964014	0.0146271	FALSE	grey
PMO014830	0.448045	0.242273	FALSE	grey
PMO014853	0.0586606	0.559311	FALSE	grey
PMO014860	0.971043	0.0117689	FALSE	grey
PMO014861	0.0100447	0.707595	TRUE	grey
PMO014868	0.614814	0.162063	FALSE	grey
PMO014882	0.304717	0.323693	FALSE	grey
PMO014902	0.134888	0.457405	FALSE	grey
PMO014903	0.630361	0.155068	FALSE	grey
PMO014905	0.539206	0.197103	FALSE	grey
PMO014915	0.378426	0.279801	FALSE	grey
PMO014945	0.765492	0.0964796	FALSE	grey
PMO014996	0.951681	0.0196446	FALSE	grey
PMO014997	0.96741	0.013246	FALSE	grey
PMO014998	0.119181	0.474389	FALSE	grey
PMO015016	0.397752	0.269059	FALSE	grey
PMO015020	0.0918908	0.507821	FALSE	grey
PMO015027	0.864896	0.0551219	FALSE	grey
PMO015031	0.111787	0.482895	FALSE	grey
PMO015041	0.774345	0.0927505	FALSE	grey
PMO015042	0.316211	0.316496	FALSE	grey
PMO015065	0.337299	0.303656	FALSE	grey
PMO015069	0.988667	0.00460518	FALSE	grey
PMO015072	0.268943	0.347125	FALSE	grey
PMO015085	0.196692	0.400756	FALSE	grey
PMO015091	0.543298	0.195157	FALSE	grey
PMO015102	0.864496	0.0552867	FALSE	grey
PMO015147	0.506647	0.212812	FALSE	grey
PMO015159	0.48942	0.221303	FALSE	grey
PMO015161	0.321618	0.31316	FALSE	grey
PMO015166	0.384483	0.276405	FALSE	grey
PMO015202	0.863958	0.0555079	FALSE	grey
PMO015205	0.732171	0.110617	FALSE	grey
PMO015234	0.597828	0.169781	FALSE	grey
PMO015251	0.638039	0.151636	FALSE	grey
PMO015264	0.0769951	0.528984	FALSE	grey
PMO015269	0.592533	0.172204	FALSE	grey
PMO015314	0.699883	0.124489	FALSE	grey
PMO015317	0.591203	0.172813	FALSE	grey
PMO015330	0.20081	0.397407	FALSE	grey
PMO015353	0.80445	0.080144	FALSE	grey
PMO015355	0.978549	0.00871736	FALSE	grey
PMO015356	0.800046	0.0819814	FALSE	grey
PMO015368	0.135664	0.4566	FALSE	grey
PMO015375	0.875193	0.0508905	FALSE	grey
PMO015384	0.9489	0.0207762	FALSE	grey
PMO015394	0.722741	0.11465	FALSE	grey
PMO015404	0.827313	0.070639	FALSE	grey
PMO015423	0.0903313	0.509923	FALSE	grey
PMO015443	0.0647301	0.548626	FALSE	grey
PMO015448	0.0201256	0.657577	TRUE	grey
PMO015456	0.214064	0.386903	FALSE	grey
PMO015461	0.26611	0.349055	FALSE	grey
PMO015464	0.172189	0.421644	FALSE	grey
PMO015466	0.620652	0.159429	FALSE	grey
PMO015504	0.563531	0.185627	FALSE	grey
PMO015511	0.800959	0.0816005	FALSE	grey
PMO015517	0.414916	0.259739	FALSE	grey
PMO015550	0.754367	0.101181	FALSE	grey
PMO015551	0.56636	0.184306	FALSE	grey
PMO015582	0.848991	0.0616739	FALSE	grey
PMO015589	0.0206565	0.655518	TRUE	grey
PMO015593	0.338917	0.302689	FALSE	grey
PMO015608	0.893743	0.0432854	FALSE	grey
PMO015610	0.0563731	0.563537	FALSE	grey
PMO015612	0.967167	0.0133449	FALSE	grey
PMO015617	0.963724	0.0147448	FALSE	grey
PMO015657	0.267651	0.348003	FALSE	grey
PMO015701	0.332703	0.306416	FALSE	grey
PMO015731	0.618812	0.160258	FALSE	grey
PMO015737	0.181854	0.413197	FALSE	grey
PMO015751	0.742999	0.106004	FALSE	grey
PMO015752	0.24357	0.364853	FALSE	grey
PMO015766	0.777976	0.0912238	FALSE	grey
PMO015786	0.809339	0.0781067	FALSE	grey
PMO015787	0.871207	0.0525278	FALSE	grey
PMO015790	0.509471	0.211432	FALSE	grey
PMO015810	0.717951	0.116704	FALSE	grey
PMO015815	0.650865	0.145936	FALSE	grey
PMO015817	0.468219	0.231941	FALSE	grey
PMO015852	0.343867	0.299746	FALSE	grey
PMO015865	0.564005	0.185405	FALSE	grey
PMO015890	0.878107	0.0496945	FALSE	grey
PMO015894	0.122854	0.470292	FALSE	grey
PMO015895	0.111735	0.482957	FALSE	grey
PMO015896	0.258405	0.354364	FALSE	grey
PMO015899	0.274322	0.343492	FALSE	grey
PMO015938	0.88183	0.0481671	FALSE	grey
PMO015957	0.864725	0.0551925	FALSE	grey
PMO015964	0.676748	0.134549	FALSE	grey
PMO015970	0.0762418	0.530126	FALSE	grey
PMO015973	0.249121	0.360886	FALSE	grey
PMO015980	0.223285	0.379827	FALSE	grey
PMO015984	0.189081	0.407062	FALSE	grey
PMO015988	0.860839	0.0567917	FALSE	grey
PMO016004	0.19012	0.406192	FALSE	grey
PMO016047	0.0239305	0.643607	TRUE	grey
PMO016058	0.0308175	0.62197	TRUE	grey
PMO016061	0.0811463	0.522825	FALSE	grey
PMO016064	0.795365	0.0839367	FALSE	grey
PMO016065	0.187415	0.408463	FALSE	grey
PMO016074	0.735262	0.109298	FALSE	grey
PMO016075	0.00287625	0.778151	TRUE	grey
PMO016083	0.166769	0.426511	FALSE	grey
PMO016094	0.03571	0.60864	TRUE	grey
PMO016111	0.892587	0.0437586	FALSE	grey
PMO016130	0.128916	0.463702	FALSE	grey
PMO016153	0.62616	0.156952	FALSE	grey
PMO016156	0.936694	0.025747	FALSE	grey
PMO016167	0.482609	0.224697	FALSE	grey
PMO016170	0.84553	0.0631027	FALSE	grey
PMO016173	0.296317	0.329048	FALSE	grey
PMO016184	0.703041	0.123124	FALSE	grey
PMO016191	0.97546	0.00997297	FALSE	grey
PMO016195	0.391543	0.27248	FALSE	grey
PMO016196	0.257015	0.355331	FALSE	grey
PMO016204	0.498459	0.216831	FALSE	grey
PMO016208	0.38044	0.278669	FALSE	grey
PMO016219	0.624646	0.157632	FALSE	grey
PMO016220	0.330676	0.30764	FALSE	grey
PMO016238	0.440342	0.246277	FALSE	grey
PMO016239	0.943058	0.0231548	FALSE	grey
PMO016241	0.765557	0.0964521	FALSE	grey
PMO016245	0.213981	0.386968	FALSE	grey
PMO016251	0.828258	0.0702473	FALSE	grey
PMO016258	0.920792	0.0322306	FALSE	grey
PMO016259	0.968932	0.0126272	FALSE	grey
PMO016275	0.255081	0.356683	FALSE	grey
PMO016293	0.408807	0.263034	FALSE	grey
PMO016365	0.10972	0.48534	FALSE	grey
PMO016392	0.61181	0.163422	FALSE	grey
PMO016394	0.376252	0.281026	FALSE	grey
PMO016408	0.563463	0.185659	FALSE	grey
PMO016415	0.338534	0.302918	FALSE	grey
PMO016416	0.458774	0.236751	FALSE	grey
PMO016419	0.677816	0.134082	FALSE	grey
PMO016434	0.894848	0.0428331	FALSE	grey
PMO016451	0.905751	0.0383731	FALSE	grey
PMO016482	0.379626	0.279126	FALSE	grey
PMO016487	0.722482	0.114761	FALSE	grey
PMO016489	0.112786	0.481726	FALSE	grey
PMO016491	0.784289	0.088574	FALSE	grey
PMO016494	0.240681	0.36694	FALSE	grey
PMO016506	0.123601	0.469469	FALSE	grey
PMO016527	0.302822	0.324894	FALSE	grey
PMO016530	0.562365	0.186172	FALSE	grey
PMO016578	0.0804114	0.5239	FALSE	grey
PMO016589	0.433792	0.249708	FALSE	grey
PMO016602	0.408126	0.263403	FALSE	grey
PMO016610	0.2628	0.351324	FALSE	grey
PMO016611	0.555368	0.189455	FALSE	grey
PMO016617	0.772642	0.093467	FALSE	grey
[truncated: 3,986 more rows]

## Sheet: Figure 2C
Genes	P	R	group	group1
PMO000080	0.0902699	0.401883	FALSE	cyan
PMO000350	0.161551	0.273824	FALSE	cyan
PMO000647	0.142163	0.304119	FALSE	cyan
PMO000682	0.154833	0.284033	FALSE	cyan
PMO000814	0.0805789	0.424102	FALSE	cyan
PMO000962	0.178541	0.249211	FALSE	cyan
PMO001017	0.149558	0.292258	FALSE	cyan
PMO001348	0.0273827	0.598119	TRUE	cyan
PMO001611	0.0165786	0.660019	TRUE	cyan
PMO002349	0.0792944	0.427178	FALSE	cyan
PMO002690	0.0684967	0.454457	FALSE	cyan
PMO002862	0.089358	0.403903	FALSE	cyan
PMO003028	0.045882	0.522669	TRUE	cyan
PMO003070	0.0769393	0.432906	FALSE	cyan
PMO003477	0.448437	-0.0205615	FALSE	cyan
PMO004286	0.0262101	0.603939	TRUE	cyan
PMO004306	0.0736599	0.441081	FALSE	cyan
PMO005027	0.0331613	0.571633	TRUE	cyan
PMO005084	0.0375674	0.553444	TRUE	cyan
PMO005086	0.0469235	0.519084	TRUE	cyan
PMO005255	0.298662	0.108751	FALSE	cyan
PMO005271	0.172996	0.257065	FALSE	cyan
PMO005395	0.0323164	0.575303	TRUE	cyan
PMO005587	0.325663	0.0826648	FALSE	cyan
PMO005625	0.397981	0.0192472	FALSE	cyan
PMO006512	0.111077	0.359067	FALSE	cyan
PMO006646	0.0272537	0.598751	TRUE	cyan
PMO006687	0.493994	-0.0540133	FALSE	cyan
PMO006859	0.106844	0.367314	FALSE	cyan
PMO006960	0.0461641	0.521693	TRUE	cyan
PMO007418	0.0471501	0.518312	TRUE	cyan
PMO007985	0.0401577	0.543408	TRUE	cyan
PMO008801	0.0872323	0.408668	FALSE	cyan
PMO008922	0.267204	0.141211	FALSE	cyan
PMO008932	0.12609	0.331401	FALSE	cyan
PMO009217	0.0602563	0.477275	FALSE	cyan
PMO009747	0.0380594	0.551503	TRUE	cyan
PMO010195	0.16585	0.267439	FALSE	cyan
PMO010220	0.428003	-0.00481866	FALSE	cyan
PMO010356	0.00963777	0.716253	TRUE	cyan
PMO010507	0.0797076	0.426185	FALSE	cyan
PMO010590	0.576809	-0.109897	FALSE	cyan
PMO010818	0.218355	0.197104	FALSE	cyan
PMO011100	0.141347	0.305455	FALSE	cyan
PMO011285	0.156302	0.281776	FALSE	cyan
PMO011647	0.00329923	0.801508	TRUE	cyan
PMO011707	0.152144	0.288201	FALSE	cyan
PMO011732	0.0767795	0.433299	FALSE	cyan
PMO012279	0.0668141	0.458962	FALSE	cyan
PMO012332	0.287408	0.12009	FALSE	cyan
PMO012803	0.0591494	0.480496	FALSE	cyan
PMO013173	0.011664	0.697619	TRUE	cyan
PMO013248	0.896697	-0.285743	FALSE	cyan
PMO013375	0.0644546	0.465407	FALSE	cyan
PMO013557	0.031046	0.580942	TRUE	cyan
PMO013602	0.0415254	0.538282	TRUE	cyan
PMO013630	0.585012	-0.115134	FALSE	cyan
PMO013690	0.425815	-0.00310364	FALSE	cyan
PMO014286	0.0704317	0.449368	FALSE	cyan
PMO014300	0.00153207	0.846291	TRUE	cyan
PMO014829	0.461367	-0.0302776	FALSE	cyan
PMO014905	0.00277627	0.812605	TRUE	cyan
PMO014988	0.164341	0.269667	FALSE	cyan
PMO015073	0.0234357	0.618438	TRUE	cyan
PMO016207	0.0617694	0.472936	FALSE	cyan
PMO016333	0.519348	-0.0717452	FALSE	cyan
PMO016357	0.234778	0.177459	FALSE	cyan
PMO016418	0.374626	0.03882	FALSE	cyan
PMO016574	0.0786905	0.428636	FALSE	cyan
PMO016935	0.313866	0.0938778	FALSE	cyan
PMO000184	0.141963	0.304446	FALSE	darkred
PMO000851	0.00053083	0.892041	TRUE	darkred
PMO000987	0.0464245	0.520795	TRUE	darkred
PMO001502	0.00513682	0.769942	TRUE	darkred
PMO001642	0.312687	0.0950134	FALSE	darkred
PMO001703	0.0779499	0.430434	FALSE	darkred
PMO001858	0.0368943	0.556127	TRUE	darkred
PMO002585	0.0454158	0.524291	TRUE	darkred
PMO003125	0.110548	0.360085	FALSE	darkred
PMO003212	0.0654619	0.462636	FALSE	darkred
PMO003217	0.0365168	0.557647	TRUE	darkred
PMO003227	0.21891	0.196423	FALSE	darkred
PMO003574	0.254187	0.15539	FALSE	darkred
PMO003706	0.0507196	0.506451	FALSE	darkred
PMO003997	0.0547757	0.49363	FALSE	darkred
PMO004110	0.029404	0.588464	TRUE	darkred
PMO004258	0.241639	0.169522	FALSE	darkred
PMO004701	0.0694927	0.451826	FALSE	darkred
PMO004795	0.0426383	0.534194	TRUE	darkred
PMO005082	0.124562	0.334114	FALSE	darkred
PMO005932	0.0263305	0.603334	TRUE	darkred
PMO006227	0.0865665	0.410176	FALSE	darkred
PMO006330	0.0199036	0.63866	TRUE	darkred
PMO006579	0.106998	0.367009	FALSE	darkred
PMO006942	0.0421715	0.5359	TRUE	darkred
PMO007236	0.0274043	0.598013	TRUE	darkred
PMO007794	0.0162781	0.662086	TRUE	darkred
PMO008526	0.0518088	0.502943	FALSE	darkred
PMO009533	0.12111	0.340321	FALSE	darkred
PMO009550	0.547862	-0.091011	FALSE	darkred
PMO010095	0.0733727	0.441808	FALSE	darkred
PMO010853	0.140169	0.307389	FALSE	darkred
PMO011014	0.0985062	0.384218	FALSE	darkred
PMO011209	0.0241226	0.614746	TRUE	darkred
PMO012050	0.38687	0.0284604	FALSE	darkred
PMO012746	0.122421	0.33795	FALSE	darkred
PMO013063	0.0926115	0.396755	FALSE	darkred
PMO013831	0.00272	0.813879	TRUE	darkred
PMO013844	0.251923	0.157905	FALSE	darkred
PMO014369	0.0317759	0.577684	TRUE	darkred
PMO014718	0.404106	0.014242	FALSE	darkred
PMO014849	0.0235171	0.617997	TRUE	darkred
PMO014873	0.0360703	0.559457	TRUE	darkred
PMO015250	0.00248831	0.819321	TRUE	darkred
PMO015897	0.0895715	0.403429	FALSE	darkred
PMO015941	0.0355005	0.561789	TRUE	darkred
PMO016467	0.0278658	0.595769	TRUE	darkred
PMO016664	0.459626	-0.0289798	FALSE	darkred
PMO016760	0.314039	0.0937111	FALSE	darkred
PMO000242	0.00964087	0.799918	TRUE	darkturquoisel
PMO001436	0.133501	0.539903	FALSE	darkturquoisel
PMO002626	0.0263315	0.727464	TRUE	darkturquoisel
PMO003002	0.210332	0.46221	FALSE	darkturquoisel
PMO003860	0.00241272	0.867995	TRUE	darkturquoisel
PMO003915	0.109923	0.568887	FALSE	darkturquoisel
PMO004015	0.0461541	0.674786	TRUE	darkturquoisel
PMO005203	0.195879	0.475404	FALSE	darkturquoisel
PMO005411	0.230248	0.444825	FALSE	darkturquoisel
PMO005999	0.0148887	0.771524	TRUE	darkturquoisel
PMO006117	0.111682	0.566603	FALSE	darkturquoisel
PMO006243	0.0165431	0.764004	TRUE	darkturquoisel
PMO006559	0.00128719	0.890402	TRUE	darkturquoisel
PMO007257	0.0224482	0.740661	TRUE	darkturquoisel
PMO007552	0.161799	0.508869	FALSE	darkturquoisel
PMO008796	0.116741	0.560152	FALSE	darkturquoisel
PMO009691	0.018556	0.755503	TRUE	darkturquoisel
PMO009765	0.0370609	0.696627	TRUE	darkturquoisel
PMO009812	0.00132127	0.889553	TRUE	darkturquoisel
PMO011421	0.00591643	0.827388	TRUE	darkturquoisel
PMO011729	0.0782839	0.614478	FALSE	darkturquoisel
PMO012049	0.0482839	0.67008	TRUE	darkturquoisel
PMO012340	0.00113089	0.894507	TRUE	darkturquoisel
PMO012758	0.0455494	0.676148	TRUE	darkturquoisel
PMO013450	0.0137337	0.777111	TRUE	darkturquoisel
PMO013555	0.112592	0.56543	FALSE	darkturquoisel
PMO013761	0.0128834	0.781429	TRUE	darkturquoisel
PMO014157	0.000775358	0.905593	TRUE	darkturquoisel
PMO014523	0.280784	0.404059	FALSE	darkturquoisel
PMO014650	0.297174	0.39168	FALSE	darkturquoisel
PMO014890	0.0105054	0.794623	TRUE	darkturquoisel
PMO015869	0.0667568	0.633916	FALSE	darkturquoisel
PMO015871	0.0521308	0.661905	FALSE	darkturquoisel
PMO016543	0.0200429	0.74961	TRUE	darkturquoisel
PMO016695	0.0407584	0.68737	TRUE	darkturquoisel
PMO000007	0.017215	0.655723	TRUE	green
PMO000049	0.17533	0.253739	FALSE	green
PMO000053	0.165394	0.268111	FALSE	green
PMO000065	0.0529408	0.499348	FALSE	green
PMO000073	0.0139519	0.679016	TRUE	green
PMO000086	0.0273767	0.598148	TRUE	green
PMO000099	0.177761	0.250305	FALSE	green
PMO000110	0.0620683	0.472087	FALSE	green
PMO000159	0.262382	0.146408	FALSE	green
PMO000207	0.63848	-0.148122	FALSE	green
PMO000214	0.0945762	0.392519	FALSE	green
PMO000270	0.0711247	0.447568	FALSE	green
PMO000276	0.0662693	0.460436	FALSE	green
PMO000284	0.41918	0.00213401	FALSE	green
PMO000297	0.0197996	0.63929	TRUE	green
PMO000301	0.670402	-0.166945	FALSE	green
PMO000319	0.0653304	0.462997	FALSE	green
PMO000325	0.187049	0.237469	FALSE	green
PMO000339	0.679263	-0.172064	FALSE	green
PMO000358	0.695447	-0.1813	FALSE	green
PMO000377	0.208799	0.208991	FALSE	green
PMO000382	0.312846	0.0948602	FALSE	green
PMO000397	0.00881214	0.724599	TRUE	green
PMO000408	0.418849	0.00239672	FALSE	green
PMO000417	0.135536	0.315106	FALSE	green
PMO000520	0.440386	-0.0144171	FALSE	green
PMO000614	0.0113011	0.700788	TRUE	green
PMO000634	0.484347	-0.047107	FALSE	green
PMO000640	0.0210113	0.632078	TRUE	green
PMO000648	0.09811	0.385045	FALSE	green
PMO000649	0.841223	-0.258662	FALSE	green
PMO000650	0.397389	0.0197337	FALSE	green
PMO000677	0.0557199	0.490737	FALSE	green
PMO000689	0.162522	0.272371	FALSE	green
PMO000730	0.316766	0.0910955	FALSE	green
PMO000745	0.150077	0.291439	FALSE	green
PMO000749	0.124996	0.33334	FALSE	green
PMO000770	0.413107	0.00697669	FALSE	green
PMO000801	0.0118155	0.696315	TRUE	green
PMO000807	0.34066	0.0687944	FALSE	green
PMO000838	0.0537267	0.496883	FALSE	green
PMO000869	0.11425	0.353021	FALSE	green
PMO000873	0.0855633	0.412464	FALSE	green
PMO000923	0.733073	-0.202231	FALSE	green
PMO000936	0.196725	0.224541	FALSE	green
PMO000939	0.0772525	0.432138	FALSE	green
PMO000978	0.00945359	0.718072	TRUE	green
PMO001002	0.0195576	0.640766	TRUE	green
PMO001014	0.0182591	0.648899	TRUE	green
PMO001030	0.962837	-0.316607	FALSE	green
PMO001079	0.00178897	0.83814	TRUE	green
PMO001116	0.0260903	0.604544	TRUE	green
PMO001156	0.758264	-0.215847	FALSE	green
PMO001180	0.0658189	0.461661	FALSE	green
PMO001204	0.0249894	0.610186	TRUE	green
PMO001217	0.731025	-0.20111	FALSE	green
PMO001224	0.093757	0.394278	FALSE	green
PMO001231	0.0559854	0.489929	FALSE	green
PMO001233	0.267661	0.140722	FALSE	green
PMO001236	0.0328876	0.572815	TRUE	green
PMO001263	0.938605	-0.305468	FALSE	green
PMO001267	0.0686039	0.454173	FALSE	green
PMO001274	0.0245973	0.612235	TRUE	green
PMO001275	0.00761886	0.737637	TRUE	green
PMO001281	0.016908	0.657782	TRUE	green
PMO001286	0.0713472	0.446992	FALSE	green
PMO001371	0.26745	0.140948	FALSE	green
PMO001372	0.0107891	0.705377	TRUE	green
PMO001480	0.41034	0.00919803	FALSE	green
PMO001485	0.122311	0.338148	FALSE	green
PMO001510	0.298821	0.108594	FALSE	green
PMO001551	0.157524	0.279909	FALSE	green
PMO001560	0.0117845	0.696581	TRUE	green
PMO001569	0.225909	0.187949	FALSE	green
PMO001641	0.0115564	0.698552	TRUE	green
PMO001668	0.171261	0.259557	FALSE	green
PMO001758	0.124375	0.334447	FALSE	green
PMO001783	0.0265838	0.602066	TRUE	green
PMO001792	0.0120323	0.694469	TRUE	green
PMO001829	0.609256	-0.13033	FALSE	green
PMO001842	0.448403	-0.0205361	FALSE	green
PMO001849	5.05833e-05	0.950689	TRUE	green
PMO001869	0.156562	0.281377	FALSE	green
PMO001875	0.63434	-0.145635	FALSE	green
PMO001885	0.430029	-0.0064015	FALSE	green
PMO001887	0.617153	-0.135193	FALSE	green
PMO001906	0.263015	0.145723	FALSE	green
PMO001930	0.328379	0.0801213	FALSE	green
PMO001985	0.229061	0.18419	FALSE	green
PMO002018	0.180911	0.245903	FALSE	green
PMO002039	0.229098	0.184146	FALSE	green
PMO002070	0.0124614	0.690879	TRUE	green
PMO002095	0.148104	0.294559	FALSE	green
PMO002102	0.067263	0.457752	FALSE	green
PMO002145	0.26489	0.143697	FALSE	green
PMO002154	0.649738	-0.154831	FALSE	green
PMO002158	0.057926	0.484103	FALSE	green
PMO002217	0.548199	-0.0912346	FALSE	green
PMO002237	0.903239	-0.288862	FALSE	green
PMO002262	0.0636117	0.467747	FALSE	green
PMO002327	0.0878289	0.407323	FALSE	green
PMO002334	0.0124239	0.69119	TRUE	green
PMO002347	0.0571413	0.486443	FALSE	green
PMO002362	0.26055	0.1484	FALSE	green
PMO002405	0.225333	0.188639	FALSE	green
PMO002427	0.155611	0.282835	FALSE	green
PMO002428	0.17005	0.261306	FALSE	green
PMO002465	0.419782	0.00165615	FALSE	green
PMO002486	0.627719	-0.141635	FALSE	green
PMO002520	0.267198	0.141217	FALSE	green
PMO002542	0.0428224	0.533524	TRUE	green
PMO002545	0.123466	0.336072	FALSE	green
PMO002576	0.000486785	0.895114	TRUE	green
PMO002582	0.236582	0.175357	FALSE	green
PMO002599	0.551389	-0.0933474	FALSE	green
PMO002637	0.410692	0.00891527	FALSE	green
PMO002641	0.508615	-0.064311	FALSE	green
PMO002660	0.662523	-0.162355	FALSE	green
PMO002665	0.128104	0.327861	FALSE	green
PMO002678	0.224884	0.189179	FALSE	green
PMO002700	0.76036	-0.216966	FALSE	green
PMO002712	0.185298	0.239857	FALSE	green
PMO002723	0.34812	0.0620452	FALSE	green
PMO002733	0.657455	-0.159384	FALSE	green
PMO002748	0.235254	0.176903	FALSE	green
PMO002773	0.306884	0.100647	FALSE	green
PMO002821	0.00876364	0.725105	TRUE	green
PMO002878	0.288131	0.119353	FALSE	green
PMO002885	0.293603	0.113813	FALSE	green
PMO002917	0.874806	-0.275193	FALSE	green
PMO002924	0.140939	0.306122	FALSE	green
PMO002928	0.0755519	0.436336	FALSE	green
PMO002994	0.0908238	0.400662	FALSE	green
PMO003000	0.816685	-0.246303	FALSE	green
PMO003013	0.656162	-0.158624	FALSE	green
PMO003095	0.114852	0.351886	FALSE	green
PMO003099	0.326636	0.0817519	FALSE	green
PMO003121	0.0603306	0.477061	FALSE	green
PMO003130	0.147786	0.295064	FALSE	green
PMO003132	0.0770362	0.432668	FALSE	green
PMO003159	0.0839724	0.416128	FALSE	green
PMO003160	0.0749258	0.437897	FALSE	green
PMO003186	0.0172728	0.655338	TRUE	green
PMO003201	0.00166136	0.842084	TRUE	green
PMO003236	0.095578	0.390382	FALSE	green
PMO003279	0.299229	0.108188	FALSE	green
PMO003300	0.395139	0.0215875	FALSE	green
PMO003302	0.254915	0.154584	FALSE	green
PMO003319	0.0546246	0.494096	FALSE	green
PMO003337	0.710031	-0.1895	FALSE	green
PMO003340	0.084075	0.41589	FALSE	green
PMO003341	0.0035744	0.796136	TRUE	green
PMO003342	0.0800062	0.425469	FALSE	green
PMO003359	0.628126	-0.141882	FALSE	green
PMO003392	0.159877	0.276341	FALSE	green
PMO003408	0.0523685	0.501159	FALSE	green
PMO003413	0.16481	0.268973	FALSE	green
PMO003459	0.693505	-0.180199	FALSE	green
PMO003483	0.170287	0.260963	FALSE	green
PMO003557	0.0914496	0.399288	FALSE	green
PMO003566	0.0417265	0.537538	TRUE	green
PMO003570	0.169459	0.262163	FALSE	green
PMO003578	0.426299	-0.00348347	FALSE	green
PMO003622	0.0343176	0.566711	TRUE	green
PMO003628	0.12709	0.329639	FALSE	green
PMO003633	0.411272	0.00844888	FALSE	green
PMO003661	0.224765	0.189322	FALSE	green
PMO003681	0.380933	0.033456	FALSE	green
PMO003689	0.00444121	0.780834	TRUE	green
PMO003701	0.00496245	0.772575	TRUE	green
PMO003788	0.395088	0.0216294	FALSE	green
PMO003833	0.302554	0.104897	FALSE	green
PMO003848	0.0839373	0.416209	FALSE	green
PMO003951	0.0382047	0.550933	TRUE	green
PMO003953	0.129041	0.326225	FALSE	green
PMO004003	0.385086	0.0299563	FALSE	green
PMO004006	0.152874	0.287065	FALSE	green
PMO004062	0.631519	-0.143934	FALSE	green
PMO004097	0.00949038	0.717707	TRUE	green
PMO004109	0.0138426	0.679856	TRUE	green
PMO004149	0.146109	0.29774	FALSE	green
PMO004173	0.309052	0.0985346	FALSE	green
PMO004177	0.678316	-0.17152	FALSE	green
PMO004205	0.156354	0.281696	FALSE	green
PMO004212	0.0139015	0.679403	TRUE	green
PMO004214	0.278486	0.129291	FALSE	green
PMO004229	0.129355	0.32568	FALSE	green
PMO004232	0.118681	0.344761	FALSE	green
PMO004268	0.00963665	0.716264	TRUE	green
PMO004301	0.702373	-0.185208	FALSE	green
PMO004330	0.456365	-0.0265405	FALSE	green
PMO004367	0.296071	0.111337	FALSE	green
PMO004388	0.110366	0.360437	FALSE	green
PMO004476	0.0306458	0.582751	TRUE	green
PMO004504	0.316432	0.0914152	FALSE	green
PMO004506	0.579775	-0.111796	FALSE	green
PMO004507	0.109946	0.361248	FALSE	green
PMO004565	0.0103492	0.709437	TRUE	green
PMO004578	0.480609	-0.0444063	FALSE	green
PMO004592	0.381964	0.0325848	FALSE	green
PMO004609	0.490699	-0.0516644	FALSE	green
PMO004635	0.00113793	0.860799	TRUE	green
PMO004649	0.210581	0.206746	FALSE	green
PMO004672	0.131512	0.321952	FALSE	green
PMO004696	0.534336	-0.0819573	FALSE	green
PMO004697	0.762727	-0.218228	FALSE	green
PMO004710	0.50087	-0.0588811	FALSE	green
PMO004774	0.503133	-0.0604729	FALSE	green
PMO004779	0.11813	0.345777	FALSE	green
PMO004805	0.0477678	0.516217	TRUE	green
PMO004817	0.201984	0.217692	FALSE	green
PMO004886	0.789866	-0.232509	FALSE	green
PMO004893	0.0101377	0.71143	TRUE	green
PMO004906	0.105673	0.369632	FALSE	green
PMO004937	0.0237432	0.616777	TRUE	green
PMO004972	0.0692255	0.452529	FALSE	green
PMO005046	0.247523	0.162836	FALSE	green
PMO005081	0.00766687	0.737087	TRUE	green
PMO005088	0.687966	-0.177049	FALSE	green
PMO005090	0.256476	0.152862	FALSE	green
PMO005095	0.0966695	0.38807	FALSE	green
PMO005217	0.400889	0.0168647	FALSE	green
PMO005229	0.564597	-0.102008	FALSE	green
PMO005246	0.0339243	0.568372	TRUE	green
PMO005336	0.534629	-0.0821555	FALSE	green
PMO005367	0.512762	-0.0671955	FALSE	green
PMO005393	0.0349536	0.564051	TRUE	green
PMO005417	0.0175964	0.653199	TRUE	green
PMO005465	0.650161	-0.155081	FALSE	green
PMO005505	0.386859	0.0284701	FALSE	green
PMO005555	0.646868	-0.153127	FALSE	green
PMO005687	0.0747716	0.438283	FALSE	green
PMO005699	0.580441	-0.112222	FALSE	green
PMO005732	0.31555	0.0922598	FALSE	green
PMO005740	0.734234	-0.202865	FALSE	green
PMO005763	0.112335	0.356655	FALSE	green
PMO005857	0.43989	-0.0140361	FALSE	green
PMO005889	0.226703	0.186998	FALSE	green
PMO006057	0.396116	0.0207815	FALSE	green
PMO006106	0.29841	0.109002	FALSE	green
PMO006125	0.215416	0.200722	FALSE	green
PMO006134	0.000446767	0.898071	TRUE	green
PMO006146	0.441574	-0.0153285	FALSE	green
PMO006192	0.354747	0.0561314	FALSE	green
PMO006198	0.430469	-0.00674457	FALSE	green
PMO006215	0.177261	0.251009	FALSE	green
PMO006244	0.000517595	0.892946	TRUE	green
PMO006247	0.31623	0.091608	FALSE	green
PMO006265	0.0758182	0.435674	FALSE	green
PMO006277	0.140506	0.306834	FALSE	green
PMO006286	0.32502	0.0832685	FALSE	green
PMO006312	0.107575	0.365874	FALSE	green
PMO006338	0.548814	-0.0916427	FALSE	green
PMO006342	0.167397	0.265168	FALSE	green
PMO006358	0.846441	-0.261259	FALSE	green
PMO006390	0.0471403	0.518345	TRUE	green
PMO006403	0.1693	0.262394	FALSE	green
PMO006439	0.151309	0.289506	FALSE	green
PMO006441	0.0141591	0.677435	TRUE	green
PMO006463	0.389875	0.0259517	FALSE	green
PMO006475	0.195657	0.225947	FALSE	green
PMO006490	0.204903	0.213941	FALSE	green
PMO006492	0.564597	-0.102008	FALSE	green
PMO006513	0.0087054	0.725715	TRUE	green
PMO006515	0.0199888	0.638145	TRUE	green
PMO006526	0.124066	0.334997	FALSE	green
PMO006546	0.82546	-0.25075	FALSE	green
PMO006570	0.158976	0.277703	FALSE	green
PMO006581	0.395938	0.0209285	FALSE	green
PMO006588	0.874661	-0.275123	FALSE	green
PMO006624	0.366499	0.0458215	FALSE	green
PMO006628	0.55985	-0.0989112	FALSE	green
PMO006657	0.124038	0.335048	FALSE	green
PMO006681	0.28509	0.122461	FALSE	green
PMO006702	0.174157	0.255407	FALSE	green
PMO006741	0.0887969	0.405154	FALSE	green
PMO006761	0.369005	0.0436514	FALSE	green
PMO006773	0.0383956	0.550187	TRUE	green
PMO006780	0.0643223	0.465773	FALSE	green
PMO006790	0.447943	-0.0201865	FALSE	green
PMO006812	0.415732	0.00487734	FALSE	green
PMO006833	0.159352	0.277134	FALSE	green
PMO006856	0.185024	0.240231	FALSE	green
PMO006887	0.0123767	0.691582	TRUE	green
PMO006935	0.0558874	0.490227	FALSE	green
PMO006943	0.00353802	0.79683	TRUE	green
PMO006967	0.0116949	0.697352	TRUE	green
PMO007050	0.365604	0.0465984	FALSE	green
PMO007084	0.905441	-0.289908	FALSE	green
PMO007097	0.209231	0.208445	FALSE	green
PMO007098	0.0688539	0.453511	FALSE	green
PMO007099	0.256142	0.15323	FALSE	green
PMO007103	0.118545	0.345012	FALSE	green
PMO007117	0.572668	-0.107235	FALSE	green
PMO007138	0.0713096	0.44709	FALSE	green
PMO007154	0.277054	0.130786	FALSE	green
PMO007155	0.581784	-0.113079	FALSE	green
PMO007160	0.0120495	0.694324	TRUE	green
PMO007173	0.0506207	0.506772	FALSE	green
PMO007177	0.00437464	0.781935	TRUE	green
PMO007224	0.0459216	0.522532	TRUE	green
PMO007235	0.0170021	0.657148	TRUE	green
PMO007269	0.28369	0.123901	FALSE	green
PMO007369	0.0612565	0.474399	FALSE	green
PMO007398	0.12523	0.332925	FALSE	green
PMO007449	0.371346	0.0416335	FALSE	green
PMO007451	0.209449	0.208171	FALSE	green
PMO007516	0.702402	-0.185224	FALSE	green
PMO007544	0.636531	-0.146952	FALSE	green
PMO007554	0.24934	0.160792	FALSE	green
PMO007560	0.139933	0.307778	FALSE	green
PMO007596	0.00664115	0.749378	TRUE	green
PMO007631	0.53758	-0.0841428	FALSE	green
PMO007649	0.884661	-0.279964	FALSE	green
PMO007654	0.222948	0.191512	FALSE	green
PMO007689	0.0849993	0.413758	FALSE	green
PMO007701	0.0320174	0.576616	TRUE	green
PMO007714	0.35508	0.0558363	FALSE	green
PMO007721	0.145774	0.298278	FALSE	green
PMO007764	0.0435031	0.531065	TRUE	green
PMO007803	0.278627	0.129144	FALSE	green
PMO007814	0.0265898	0.602036	TRUE	green
PMO007885	0.211768	0.205259	FALSE	green
PMO007916	0.0478143	0.51606	TRUE	green
PMO007932	0.0354781	0.561881	TRUE	green
PMO007948	0.0586337	0.48201	FALSE	green
PMO007958	0.0170023	0.657147	TRUE	green
PMO007960	0.694597	-0.180818	FALSE	green
PMO007964	0.705998	-0.187244	FALSE	green
PMO008010	0.000680337	0.882732	TRUE	green
PMO008013	0.0612825	0.474325	FALSE	green
PMO008084	0.182126	0.244218	FALSE	green
PMO008089	0.212078	0.204872	FALSE	green
PMO008108	0.342511	0.0671104	FALSE	green
PMO008110	0.29974	0.10768	FALSE	green
PMO008122	0.207825	0.210223	FALSE	green
PMO008136	0.175226	0.253886	FALSE	green
PMO008155	0.304002	0.103471	FALSE	green
PMO008179	0.890383	-0.282718	FALSE	green
PMO008211	0.266185	0.142305	FALSE	green
PMO008212	0.391132	0.0249062	FALSE	green
PMO008213	0.247594	0.162756	FALSE	green
PMO008217	0.14313	0.302546	FALSE	green
PMO008262	0.0121554	0.693431	TRUE	green
PMO008271	0.569773	-0.105366	FALSE	green
PMO008315	0.0205469	0.634808	TRUE	green
PMO008317	0.456535	-0.0266679	FALSE	green
PMO008328	0.055787	0.490533	FALSE	green
PMO008351	0.420563	0.00103777	FALSE	green
PMO008399	0.886234	-0.280722	FALSE	green
PMO008417	0.0441357	0.528804	TRUE	green
PMO008452	0.400328	0.0173234	FALSE	green
PMO008466	0.0437755	0.530089	TRUE	green
PMO008516	0.241121	0.170116	FALSE	green
PMO008529	0.0862	0.41101	FALSE	green
PMO008532	0.153292	0.286415	FALSE	green
PMO008543	0.543735	-0.0882648	FALSE	green
PMO008577	0.00226126	0.824993	TRUE	green
PMO008666	0.615133	-0.133953	FALSE	green
PMO008710	0.163561	0.270825	FALSE	green
PMO008730	0.357772	0.0534555	FALSE	green
PMO008735	0.0308296	0.581918	TRUE	green
PMO008768	0.162347	0.272633	FALSE	green
PMO008865	0.209499	0.208108	FALSE	green
PMO008888	0.320829	0.0872261	FALSE	green
PMO008894	0.0133284	0.683871	TRUE	green
PMO008917	0.0995649	0.38202	FALSE	green
PMO008919	0.369652	0.0430933	FALSE	green
PMO008921	0.0825416	0.419463	FALSE	green
PMO008957	0.114942	0.351716	FALSE	green
PMO008960	0.932893	-0.302815	FALSE	green
PMO008962	0.229805	0.183307	FALSE	green
PMO009024	0.257154	0.152116	FALSE	green
PMO009056	0.171175	0.259681	FALSE	green
PMO009075	0.297049	0.110359	FALSE	green
PMO009083	0.419199	0.00211865	FALSE	green
PMO009134	0.0285029	0.592712	TRUE	green
PMO009199	0.0276262	0.596931	TRUE	green
PMO009206	0.321651	0.0864467	FALSE	green
PMO009222	0.0184072	0.647952	TRUE	green
PMO009226	0.283098	0.12451	FALSE	green
PMO009256	0.0836543	0.416866	FALSE	green
PMO009258	0.770611	-0.22241	FALSE	green
PMO009361	0.0613074	0.474253	FALSE	green
PMO009362	0.481371	-0.0449574	FALSE	green
PMO009391	0.0146236	0.673946	TRUE	green
PMO009440	0.270564	0.137627	FALSE	green
PMO009448	0.21375	0.202788	FALSE	green
PMO009465	0.0874601	0.408154	FALSE	green
PMO009490	0.258907	0.150194	FALSE	green
PMO009503	0.634957	-0.146006	FALSE	green
PMO009540	0.0020858	0.829642	TRUE	green
PMO009557	0.564975	-0.102254	FALSE	green
PMO009589	0.781999	-0.228403	FALSE	green
PMO009590	0.571462	-0.106457	FALSE	green
PMO009615	0.0926218	0.396733	FALSE	green
PMO009625	0.11832	0.345427	FALSE	green
PMO009649	0.108159	0.364728	FALSE	green
PMO009652	0.341983	0.0675897	FALSE	green
PMO009668	0.10979	0.361551	FALSE	green
PMO009692	0.0766918	0.433515	FALSE	green
PMO009696	0.0135295	0.682289	TRUE	green
PMO009716	0.356185	0.0548579	FALSE	green
PMO009733	0.14995	0.29164	FALSE	green
PMO009784	0.180882	0.245943	FALSE	green
PMO009826	0.0476983	0.516452	TRUE	green
PMO009866	0.524269	-0.0751197	FALSE	green
PMO009875	0.165199	0.268399	FALSE	green
PMO009892	0.00109463	0.862587	TRUE	green
PMO009897	0.425122	-0.00255916	FALSE	green
PMO010049	0.375292	0.0382507	FALSE	green
PMO010071	0.00171441	0.840421	TRUE	green
PMO010076	0.0876219	0.407789	FALSE	green
PMO010085	0.175157	0.253984	FALSE	green
PMO010123	0.430253	-0.00657606	FALSE	green
PMO010126	0.175475	0.253533	FALSE	green
PMO010145	0.0388348	0.548478	TRUE	green
PMO010152	0.101348	0.378353	FALSE	green
PMO010159	0.851086	-0.263562	FALSE	green
PMO010177	0.332183	0.0765828	FALSE	green
PMO010203	0.971357	-0.32048	FALSE	green
PMO010226	0.589821	-0.118181	FALSE	green
PMO010237	0.0612152	0.474517	FALSE	green
PMO010281	0.0375965	0.553329	TRUE	green
PMO010360	0.000394187	0.902237	TRUE	green
PMO010369	0.00187107	0.835701	TRUE	green
PMO010402	0.394857	0.0218202	FALSE	green
PMO010457	0.0355726	0.561492	TRUE	green
PMO010458	0.894193	-0.284544	FALSE	green
PMO010493	0.0320104	0.576647	TRUE	green
PMO010501	0.277834	0.129971	FALSE	green
PMO010551	0.525895	-0.0762297	FALSE	green
PMO010555	0.0596309	0.47909	FALSE	green
PMO010575	0.196025	0.225463	FALSE	green
PMO010591	0.427022	-0.00405026	FALSE	green
PMO010597	0.0999803	0.381162	FALSE	green
PMO010665	0.301747	0.105694	FALSE	green
PMO010673	0.837308	-0.256706	FALSE	green
PMO010716	0.466223	-0.0338797	FALSE	green
PMO010737	0.265893	0.142618	FALSE	green
PMO010740	0.0431333	0.532398	TRUE	green
PMO010761	0.0449485	0.525928	TRUE	green
PMO010762	0.879702	-0.277568	FALSE	green
PMO010785	0.16235	0.272629	FALSE	green
PMO010842	0.254501	0.155042	FALSE	green
PMO010888	0.738615	-0.205253	FALSE	green
PMO010894	0.297902	0.109508	FALSE	green
PMO010940	0.34759	0.0625223	FALSE	green
PMO010970	0.25043	0.159572	FALSE	green
PMO011037	0.119552	0.343163	FALSE	green
PMO011118	0.301125	0.106309	FALSE	green
PMO011192	0.00831756	0.729851	TRUE	green
PMO011212	0.762232	-0.217964	FALSE	green
PMO011236	0.378201	0.0357718	FALSE	green
PMO011252	0.0856536	0.412257	FALSE	green
PMO011335	0.271182	0.136971	FALSE	green
PMO011350	0.425268	-0.00267381	FALSE	green
PMO011405	0.176032	0.252744	FALSE	green
PMO011418	0.00316741	0.804188	TRUE	green
PMO011449	0.44715	-0.019584	FALSE	green
PMO011451	0.212701	0.204094	FALSE	green
PMO011472	0.0517042	0.503277	FALSE	green
PMO011500	0.171623	0.259036	FALSE	green
PMO011506	0.00969235	0.715719	TRUE	green
PMO011537	0.136795	0.312991	FALSE	green
PMO011586	0.539322	-0.0853122	FALSE	green
PMO011638	0.0266334	0.601819	TRUE	green
PMO011648	0.331196	0.0774988	FALSE	green
PMO011666	0.403681	0.0145874	FALSE	green
PMO011681	0.0226692	0.622644	TRUE	green
PMO011722	0.0200136	0.637996	TRUE	green
PMO011739	0.292847	0.114574	FALSE	green
PMO011743	0.513537	-0.067733	FALSE	green
PMO011863	0.0619119	0.472531	FALSE	green
PMO011864	0.909455	-0.291812	FALSE	green
PMO011901	0.0483766	0.514171	TRUE	green
PMO011921	0.263705	0.144976	FALSE	green
PMO011949	0.0942244	0.393273	FALSE	green
PMO011974	0.0159296	0.664515	TRUE	green
PMO011992	0.185572	0.239481	FALSE	green
PMO012015	0.729347	-0.200191	FALSE	green
PMO012027	0.392328	0.0239129	FALSE	green
PMO012028	0.0123789	0.691563	TRUE	green
PMO012074	0.131684	0.321656	FALSE	green
PMO012083	0.415316	0.00520948	FALSE	green
PMO012090	0.0374512	0.553905	TRUE	green
PMO012105	0.585395	-0.115377	FALSE	green
PMO012113	0.416221	0.0044874	FALSE	green
PMO012138	0.462824	-0.0313606	FALSE	green
PMO012144	0.459893	-0.0291792	FALSE	green
PMO012167	0.0556415	0.490976	FALSE	green
PMO012204	0.0500978	0.508476	FALSE	green
PMO012273	0.290464	0.116982	FALSE	green
PMO012274	0.274612	0.133346	FALSE	green
PMO012284	0.126516	0.330649	FALSE	green
PMO012293	0.474672	-0.0400874	FALSE	green
PMO012302	0.00683363	0.746979	TRUE	green
PMO012303	0.101459	0.378127	FALSE	green
PMO012308	0.283293	0.12431	FALSE	green
PMO012320	0.00530307	0.767487	TRUE	green
PMO012325	0.0301245	0.58513	TRUE	green
PMO012355	0.262028	0.146793	FALSE	green
PMO012371	0.786235	-0.230617	FALSE	green
PMO012430	0.218091	0.197427	FALSE	green
PMO012432	0.244216	0.16658	FALSE	green
PMO012475	0.601109	-0.125269	FALSE	green
PMO012511	0.00145196	0.849019	TRUE	green
PMO012537	0.0536733	0.49705	FALSE	green
PMO012543	0.00516238	0.769561	TRUE	green
PMO012568	0.0662301	0.460543	FALSE	green
PMO012569	0.745651	-0.209067	FALSE	green
PMO012570	0.103448	0.374089	FALSE	green
PMO012603	0.370437	0.0424162	FALSE	green
PMO012619	0.551213	-0.0932308	FALSE	green
PMO012621	0.171773	0.25882	FALSE	green
PMO012628	0.139534	0.308436	FALSE	green
PMO012637	0.0334307	0.570476	TRUE	green
PMO012657	0.0385795	0.549469	TRUE	green
PMO012673	0.511581	-0.0663753	FALSE	green
PMO012683	0.0153874	0.668365	TRUE	green
PMO012691	0.113414	0.354602	FALSE	green
PMO012715	0.449939	-0.0216999	FALSE	green
PMO012731	0.0165799	0.66001	TRUE	green
PMO012764	0.167488	0.265035	FALSE	green
PMO012776	0.209516	0.208086	FALSE	green
PMO012811	0.461624	-0.0304686	FALSE	green
PMO012814	0.021812	0.627462	TRUE	green
PMO012841	0.0449197	0.52603	TRUE	green
PMO012842	0.0916975	0.398746	FALSE	green
PMO012888	0.0369189	0.556029	TRUE	green
PMO012932	0.183087	0.242892	FALSE	green
PMO012940	0.185493	0.23959	FALSE	green
PMO012945	0.306985	0.100549	FALSE	green
PMO012963	0.0715665	0.446426	FALSE	green
PMO013022	0.340332	0.0690929	FALSE	green
PMO013036	0.120754	0.340969	FALSE	green
PMO013043	0.58823	-0.117175	FALSE	green
PMO013078	0.000278731	0.912904	TRUE	green
PMO013106	0.284898	0.122658	FALSE	green
PMO013131	0.337658	0.0715376	FALSE	green
PMO013137	0.825762	-0.250903	FALSE	green
PMO013138	0.744223	-0.208295	FALSE	green
PMO013171	0.832366	-0.254229	FALSE	green
PMO013181	0.220415	0.194587	FALSE	green
PMO013188	0.496662	-0.0559073	FALSE	green
PMO013207	0.271374	0.136766	FALSE	green
PMO013229	0.216981	0.198791	FALSE	green
PMO013249	0.196376	0.225001	FALSE	green
PMO013250	0.0645265	0.465208	FALSE	green
PMO013252	0.27579	0.13211	FALSE	green
PMO013291	0.614895	-0.133807	FALSE	green
PMO013293	0.492225	-0.052753	FALSE	green
PMO013314	0.342989	0.0666764	FALSE	green
PMO013321	0.807794	-0.241764	FALSE	green
PMO013322	0.634427	-0.145687	FALSE	green
PMO013336	0.269865	0.13837	FALSE	green
PMO013518	0.874328	-0.274961	FALSE	green
PMO013540	0.00196865	0.832893	TRUE	green
PMO013546	0.00461736	0.777974	TRUE	green
PMO013567	0.0635272	0.467983	FALSE	green
PMO013584	0.0747086	0.438441	FALSE	green
PMO013616	0.129212	0.325928	FALSE	green
PMO013618	0.224607	0.189512	FALSE	green
PMO013620	0.0128643	0.687583	TRUE	green
PMO013638	0.655703	-0.158353	FALSE	green
PMO013647	0.276028	0.13186	FALSE	green
PMO013664	0.178108	0.249818	FALSE	green
PMO013665	0.43423	-0.0096683	FALSE	green
PMO013685	0.0263727	0.603122	TRUE	green
PMO013796	0.340522	0.0689193	FALSE	green
PMO013828	0.00511171	0.770318	TRUE	green
PMO013840	0.0106062	0.707051	TRUE	green
PMO013852	0.462246	-0.0309311	FALSE	green
PMO013862	0.144319	0.30062	FALSE	green
PMO013939	0.327501	0.0809423	FALSE	green
PMO013987	0.339343	0.0699956	FALSE	green
PMO014040	0.0842453	0.415496	FALSE	green
PMO014050	0.0726051	0.443762	FALSE	green
PMO014081	0.0476586	0.516586	TRUE	green
PMO014104	0.00349528	0.797652	TRUE	green
PMO014115	0.0519809	0.502393	FALSE	green
PMO014125	0.37601	0.0376376	FALSE	green
PMO014158	0.000294627	0.911278	TRUE	green
PMO014173	0.25121	0.1587	FALSE	green
PMO014182	0.268268	0.140072	FALSE	green
PMO014187	0.333437	0.0754227	FALSE	green
PMO014188	0.334177	0.074739	FALSE	green
PMO014221	0.127562	0.32881	FALSE	green
PMO014222	0.00365489	0.794618	TRUE	green
PMO014240	0.143083	0.302622	FALSE	green
PMO014244	0.336812	0.0723133	FALSE	green
PMO014247	0.0293181	0.588865	TRUE	green
PMO014250	0.12298	0.336945	FALSE	green
PMO014264	0.255417	0.15403	FALSE	green
PMO014278	0.0473132	0.517757	TRUE	green
PMO014301	0.246265	0.164256	FALSE	green
PMO014310	0.00703773	0.744485	TRUE	green
PMO014327	0.318384	0.0895504	FALSE	green
PMO014337	0.0194765	0.641263	TRUE	green
PMO014375	0.0489997	0.512094	TRUE	green
PMO014420	0.354398	0.0564405	FALSE	green
PMO014492	0.211503	0.205591	FALSE	green
PMO014525	0.272249	0.13584	FALSE	green
PMO014533	0.0833789	0.417507	FALSE	green
PMO014563	0.827277	-0.251668	FALSE	green
PMO014591	0.163918	0.270295	FALSE	green
PMO014614	0.464769	-0.0328035	FALSE	green
PMO014617	0.178785	0.248869	FALSE	green
PMO014626	0.288841	0.11863	FALSE	green
PMO014635	0.104869	0.371235	FALSE	green
PMO014641	0.0350124	0.563806	TRUE	green
PMO014649	0.000446201	0.898114	TRUE	green
PMO014651	0.226239	0.187554	FALSE	green
PMO014658	0.00982782	0.7144	TRUE	green
PMO014679	0.830544	-0.253313	FALSE	green
PMO014743	0.21025	0.207163	FALSE	green
PMO014750	0.00826914	0.730376	TRUE	green
PMO014767	0.25981	0.149207	FALSE	green
PMO014778	0.0149418	0.671597	TRUE	green
PMO014808	0.57878	-0.11116	FALSE	green
PMO014830	0.677494	-0.171046	FALSE	green
PMO014839	0.965368	-0.31776	FALSE	green
PMO014879	0.635936	-0.146595	FALSE	green
PMO014889	0.142825	0.303042	FALSE	green
PMO014908	0.464241	-0.0324122	FALSE	green
PMO014967	0.314865	0.092917	FALSE	green
PMO015033	0.0517981	0.502977	FALSE	green
PMO015038	0.501908	-0.0596118	FALSE	green
PMO015047	0.0396443	0.545362	TRUE	green
PMO015078	0.17891	0.248694	FALSE	green
PMO015133	0.159831	0.276411	FALSE	green
PMO015199	0.0862697	0.410851	FALSE	green
PMO015221	0.670998	-0.167291	FALSE	green
PMO015270	0.106203	0.368581	FALSE	green
PMO015344	0.0817264	0.421381	FALSE	green
PMO015352	0.518713	-0.071308	FALSE	green
PMO015368	0.000709078	0.881103	TRUE	green
PMO015388	0.135585	0.315023	FALSE	green
PMO015443	0.00602749	0.757348	TRUE	green
PMO015486	0.404345	0.014047	FALSE	green
PMO015515	0.051596	0.503624	FALSE	green
PMO015527	0.165229	0.268354	FALSE	green
PMO015586	0.0343026	0.566774	TRUE	green
PMO015603	0.000181535	0.924504	TRUE	green
PMO015642	0.251497	0.158379	FALSE	green
PMO015644	0.0144997	0.674869	TRUE	green
PMO015645	0.409625	0.00977399	FALSE	green
PMO015664	0.356079	0.0549512	FALSE	green
PMO015686	0.000332343	0.907643	TRUE	green
PMO015693	0.054009	0.496004	FALSE	green
PMO015707	0.00422509	0.784449	TRUE	green
PMO015713	0.324069	0.0841636	FALSE	green
PMO015737	0.813086	-0.244469	FALSE	green
PMO015746	0.349427	0.0608729	FALSE	green
PMO015753	0.587486	-0.116704	FALSE	green
PMO015783	0.0800198	0.425437	FALSE	green
PMO015784	0.10411	0.372757	FALSE	green
PMO015791	0.0225188	0.623481	TRUE	green
PMO015800	0.107432	0.366154	FALSE	green
PMO015808	0.824141	-0.250084	FALSE	green
PMO015810	0.685672	-0.175739	FALSE	green
PMO015812	0.0348917	0.564308	TRUE	green
PMO015813	0.517236	-0.0702904	FALSE	green
PMO015833	0.0849229	0.413933	FALSE	green
PMO015841	0.441618	-0.0153623	FALSE	green
PMO015875	0.360841	0.0507575	FALSE	green
PMO015901	0.268419	0.139912	FALSE	green
PMO015932	0.00423969	0.784201	TRUE	green
PMO015934	0.0472604	0.517936	TRUE	green
PMO015937	0.117544	0.346861	FALSE	green
PMO015938	0.355275	0.055663	FALSE	green
PMO015954	0.604504	-0.127384	FALSE	green
PMO016050	0.315201	0.0925951	FALSE	green
PMO016054	0.00316475	0.804242	TRUE	green
PMO016063	0.464745	-0.032786	FALSE	green
PMO016064	0.0941165	0.393505	FALSE	green
PMO016067	0.00269333	0.81449	TRUE	green
PMO016082	0.00185263	0.836242	TRUE	green
PMO016106	0.386726	0.0285813	FALSE	green
PMO016116	0.0627543	0.47015	FALSE	green
PMO016132	0.449506	-0.021372	FALSE	green
PMO016144	0.000506139	0.893742	TRUE	green
PMO016172	0.201612	0.218173	FALSE	green
PMO016184	0.120246	0.341895	FALSE	green
PMO016197	0.833787	-0.254942	FALSE	green
PMO016286	0.0104492	0.708503	TRUE	green
PMO016321	0.0764306	0.434159	FALSE	green
PMO016435	0.267132	0.141289	FALSE	green
PMO016470	0.33802	0.0712053	FALSE	green
PMO016476	0.00815021	0.731675	TRUE	green
PMO016489	0.111597	0.358066	FALSE	green
PMO016501	0.230417	0.182583	FALSE	green
PMO016515	0.192612	0.229984	FALSE	green
PMO016522	0.380107	0.0341553	FALSE	green
PMO016610	0.413889	0.00635007	FALSE	green
PMO016648	0.601675	-0.125623	FALSE	green
PMO016674	0.763563	-0.218673	FALSE	green
PMO016693	0.310685	0.096949	FALSE	green
PMO016803	0.0533505	0.49806	FALSE	green
PMO016830	0.169427	0.26221	FALSE	green
PMO016951	0.215276	0.200895	FALSE	green
PMO017007	0.0307956	0.582072	TRUE	green
PMO000047	0.18443	0.241045	FALSE	greenyellow
PMO000064	0.33041	0.0782289	FALSE	greenyellow
PMO000068	0.158343	0.278662	FALSE	greenyellow
PMO000483	0.194546	0.227415	FALSE	greenyellow
PMO000492	0.29613	0.111277	FALSE	greenyellow
PMO000927	0.0564338	0.488571	FALSE	greenyellow
PMO001054	0.0911242	0.400002	FALSE	greenyellow
PMO001315	0.238036	0.173671	FALSE	greenyellow
PMO001667	0.0425277	0.534597	TRUE	greenyellow
PMO002223	0.892549	-0.283757	FALSE	greenyellow
PMO002316	0.0556736	0.490878	FALSE	greenyellow
PMO002320	0.0758985	0.435475	FALSE	greenyellow
PMO002361	0.0502535	0.507967	FALSE	greenyellow
PMO002633	0.986244	-0.327191	FALSE	greenyellow
PMO002899	0.0637634	0.467325	FALSE	greenyellow
PMO003284	0.0550023	0.492933	FALSE	greenyellow
PMO003473	0.275012	0.132926	FALSE	greenyellow
PMO003523	0.573518	-0.107782	FALSE	greenyellow
PMO003561	0.0399944	0.544028	TRUE	greenyellow
PMO003596	0.161719	0.273573	FALSE	greenyellow
PMO003736	0.0556233	0.491031	FALSE	greenyellow
PMO004098	0.131629	0.321751	FALSE	greenyellow
PMO004422	0.449953	-0.02171	FALSE	greenyellow
PMO004483	0.313651	0.094085	FALSE	greenyellow
PMO004927	0.239205	0.17232	FALSE	greenyellow
PMO005175	0.217007	0.198759	FALSE	greenyellow
PMO005250	0.430721	-0.00694096	FALSE	greenyellow
PMO005438	0.113401	0.354627	FALSE	greenyellow
PMO006257	0.0729735	0.442822	FALSE	greenyellow
PMO006864	0.112667	0.356021	FALSE	greenyellow
PMO007250	0.0011257	0.861299	TRUE	greenyellow
PMO007312	0.066904	0.458719	FALSE	greenyellow
PMO007328	0.00692628	0.745841	TRUE	greenyellow
PMO007344	0.246629	0.163845	FALSE	greenyellow
PMO007352	0.00632104	0.753471	TRUE	greenyellow
PMO007413	0.484721	-0.047376	FALSE	greenyellow
PMO007561	0.295746	0.111662	FALSE	greenyellow
PMO008308	0.172652	0.257558	FALSE	greenyellow
PMO008359	0.621318	-0.137741	FALSE	greenyellow
PMO008573	0.206655	0.211707	FALSE	greenyellow
PMO008839	0.159044	0.2776	FALSE	greenyellow
PMO009475	0.170471	0.260697	FALSE	greenyellow
PMO009771	0.164501	0.26943	FALSE	greenyellow
PMO010467	0.0293045	0.588929	TRUE	greenyellow
PMO010702	0.255096	0.154383	FALSE	greenyellow
PMO011329	0.178093	0.249839	FALSE	greenyellow
PMO011645	0.00807836	0.732465	TRUE	greenyellow
PMO011875	0.24612	0.16442	FALSE	greenyellow
PMO012005	0.0647946	0.464469	FALSE	greenyellow
PMO012040	0.059158	0.480471	FALSE	greenyellow
PMO012143	0.142375	0.303775	FALSE	greenyellow
PMO012246	0.430137	-0.00648601	FALSE	greenyellow
PMO012345	0.0379695	0.551856	TRUE	greenyellow
PMO012415	0.270559	0.137632	FALSE	greenyellow
PMO012620	0.278282	0.129503	FALSE	greenyellow
PMO012650	0.0428028	0.533595	TRUE	greenyellow
PMO013109	0.0375605	0.553471	TRUE	greenyellow
PMO013244	0.410043	0.0094376	FALSE	greenyellow
PMO013343	0.220927	0.193964	FALSE	greenyellow
PMO013645	0.0843214	0.41532	FALSE	greenyellow
PMO013715	0.471838	-0.0380135	FALSE	greenyellow
PMO013904	0.424488	-0.00206015	FALSE	greenyellow
PMO014085	0.0672723	0.457728	FALSE	greenyellow
PMO014777	0.174318	0.255177	FALSE	greenyellow
PMO014847	0.157337	0.280194	FALSE	greenyellow
PMO015043	0.0868643	0.409501	FALSE	greenyellow
PMO015054	0.165144	0.268479	FALSE	greenyellow
PMO015146	0.589424	-0.11793	FALSE	greenyellow
PMO015492	0.224309	0.18987	FALSE	greenyellow
PMO015576	0.198815	0.221805	FALSE	greenyellow
PMO015676	0.0196717	0.640069	TRUE	greenyellow
PMO015763	0.210251	0.207161	FALSE	greenyellow
PMO016087	0.760732	-0.217164	FALSE	greenyellow
PMO016176	0.308153	0.099409	FALSE	greenyellow
PMO016266	0.741416	-0.206775	FALSE	greenyellow
PMO016493	0.218676	0.19671	FALSE	greenyellow
PMO016526	0.0420568	0.536321	TRUE	greenyellow
PMO016604	0.278932	0.128827	FALSE	greenyellow
PMO016635	0.326049	0.0823023	FALSE	greenyellow
PMO000338	0.00247763	0.81958	TRUE	grey60
PMO000707	0.00275529	0.813078	TRUE	grey60
PMO000772	0.0449235	0.526016	TRUE	grey60
PMO000992	0.0201659	0.63708	TRUE	grey60
PMO001229	0.0111655	0.701989	TRUE	grey60
PMO001440	0.448162	-0.0203526	FALSE	grey60
PMO001442	0.325605	0.0827192	FALSE	grey60
PMO002774	0.0065795	0.750156	TRUE	grey60
PMO003386	0.0895685	0.403436	FALSE	grey60
PMO003416	0.00238001	0.821982	TRUE	grey60
PMO003462	0.016729	0.658994	TRUE	grey60
PMO003555	0.0368372	0.556356	TRUE	grey60
PMO003929	0.0288868	0.590891	TRUE	grey60
PMO004085	0.00532705	0.767137	TRUE	grey60
PMO004373	0.0698165	0.450976	FALSE	grey60
PMO004508	0.00441948	0.781192	TRUE	grey60
PMO004836	0.0940609	0.393624	FALSE	grey60
PMO004962	0.00616268	0.755547	TRUE	grey60
PMO005093	0.0414641	0.538509	TRUE	grey60
PMO005153	0.259709	0.149317	FALSE	grey60
PMO005269	0.0137353	0.680686	TRUE	grey60
PMO005275	3.69888e-05	0.955575	TRUE	grey60
PMO005693	0.00303712	0.80691	TRUE	grey60
PMO006136	0.213641	0.202923	FALSE	grey60
PMO006155	0.134857	0.316251	FALSE	grey60
PMO006226	0.147091	0.296171	FALSE	grey60
PMO007143	0.320594	0.0874484	FALSE	grey60
PMO007193	0.0680099	0.455753	FALSE	grey60
PMO007305	0.0424598	0.534844	TRUE	grey60
PMO007375	0.245372	0.165268	FALSE	grey60
PMO008795	0.023978	0.615518	TRUE	grey60
PMO009095	0.0113668	0.700209	TRUE	grey60
PMO009096	0.0283375	0.593501	TRUE	grey60
PMO010505	0.151886	0.288604	FALSE	grey60
PMO010511	0.028626	0.592126	TRUE	grey60
PMO010649	0.0272458	0.59879	TRUE	grey60
PMO010769	0.0958663	0.389769	FALSE	grey60
PMO010975	0.508314	-0.0641006	FALSE	grey60
PMO011089	0.0505911	0.506868	FALSE	grey60
PMO011166	0.0119647	0.695042	TRUE	grey60
PMO011292	0.109515	0.362084	FALSE	grey60
PMO011362	0.0303434	0.584128	TRUE	grey60
PMO011437	0.411786	0.00803633	FALSE	grey60
PMO011825	0.117502	0.346939	FALSE	grey60
PMO012330	0.0209347	0.632525	TRUE	grey60
PMO012462	0.089274	0.40409	FALSE	grey60
PMO012573	0.0529308	0.49938	FALSE	grey60
PMO012763	0.189414	0.234269	FALSE	grey60
PMO012905	0.165531	0.267908	FALSE	grey60
PMO013031	0.32755	0.0808958	FALSE	grey60
PMO014295	0.00490605	0.77344	TRUE	grey60
PMO014385	0.00641982	0.752193	TRUE	grey60
PMO014407	0.109219	0.362659	FALSE	grey60
PMO014584	0.13042	0.323834	FALSE	grey60
PMO014652	0.17886	0.248764	FALSE	grey60
PMO014895	0.0433992	0.531439	TRUE	grey60
PMO015012	0.0503112	0.507779	FALSE	grey60
PMO015031	0.0230019	0.620807	TRUE	grey60
PMO015128	0.00195028	0.833414	TRUE	grey60
PMO015894	0.0641279	0.466312	FALSE	grey60
PMO015936	0.232931	0.179621	FALSE	grey60
PMO015968	0.0633059	0.468602	FALSE	grey60
PMO015988	0.213852	0.20266	FALSE	grey60
PMO016407	0.14094	0.306121	FALSE	grey60
PMO016512	0.188414	0.235619	FALSE	grey60
PMO017005	0.01215	0.693476	TRUE	grey60
PMO017008	0.0822951	0.420042	FALSE	grey60
PMO000020	0.0484279	0.669767	TRUE	lightcyanl
PMO000243	0.394604	0.324257	FALSE	lightcyanl
PMO000396	0.166551	0.503976	FALSE	lightcyanl
PMO000555	0.426721	0.303818	FALSE	lightcyanl
PMO001296	0.0992086	0.583302	FALSE	lightcyanl
PMO001490	0.264521	0.416718	FALSE	lightcyanl
PMO002044	0.370848	0.339874	FALSE	lightcyanl
PMO002297	0.397843	0.322162	FALSE	lightcyanl
PMO002447	0.19819	0.473259	FALSE	lightcyanl
PMO002898	0.324392	0.37187	FALSE	lightcyanl
PMO003003	0.169005	0.501481	FALSE	lightcyanl
PMO003525	0.266545	0.41512	FALSE	lightcyanl
PMO003672	0.0630868	0.640542	FALSE	lightcyanl
PMO003872	0.057416	0.651277	FALSE	lightcyanl
PMO003952	0.105737	0.574413	FALSE	lightcyanl
PMO004458	0.223774	0.450382	FALSE	lightcyanl
PMO004642	0.129776	0.544267	FALSE	lightcyanl
PMO004961	0.198264	0.473191	FALSE	lightcyanl
PMO005113	0.158242	0.512586	FALSE	lightcyanl
PMO005195	0.0431009	0.681783	TRUE	lightcyanl
PMO005388	0.491729	0.264423	FALSE	lightcyanl
PMO005406	0.516525	0.24998	FALSE	lightcyanl
PMO005457	0.241067	0.435724	FALSE	lightcyanl
PMO005531	0.223305	0.450789	FALSE	lightcyanl
PMO005605	0.244682	0.432731	FALSE	lightcyanl
PMO005665	0.0874844	0.600207	FALSE	lightcyanl
PMO005695	0.0401808	0.688779	TRUE	lightcyanl
PMO005720	0.749181	0.124726	FALSE	lightcyanl
PMO005755	0.215585	0.45754	FALSE	lightcyanl
PMO006748	0.016408	0.764599	TRUE	lightcyanl
PMO006789	0.0489728	0.668586	TRUE	lightcyanl
PMO007200	0.407962	0.315667	FALSE	lightcyanl
PMO007374	0.255621	0.42382	FALSE	lightcyanl
PMO007886	0.427	0.303643	FALSE	lightcyanl
PMO008101	0.109729	0.56914	FALSE	lightcyanl
PMO008106	0.893204	0.0525441	FALSE	lightcyanl
PMO008312	0.0627567	0.64115	FALSE	lightcyanl
PMO008567	0.315899	0.377959	FALSE	lightcyanl
PMO008724	0.183439	0.487205	FALSE	lightcyanl
PMO008778	0.286818	0.399459	FALSE	lightcyanl
PMO009102	0.0301101	0.715801	TRUE	lightcyanl
PMO009158	0.0172313	0.761024	TRUE	lightcyanl
PMO009318	0.0898051	0.596756	FALSE	lightcyanl
PMO009496	0.109177	0.569863	FALSE	lightcyanl
PMO010184	0.0496733	0.667081	TRUE	lightcyanl
PMO010633	0.361377	0.346232	FALSE	lightcyanl
PMO010864	0.0973934	0.585836	FALSE	lightcyanl
PMO010966	0.102047	0.579395	FALSE	lightcyanl
PMO011086	0.389023	0.327885	FALSE	lightcyanl
PMO011264	0.0369794	0.696837	TRUE	lightcyanl
PMO011284	0.125337	0.549566	FALSE	lightcyanl
PMO011353	0.304534	0.386236	FALSE	lightcyanl
PMO012086	0.761885	0.118254	FALSE	lightcyanl
PMO012162	0.102374	0.578949	FALSE	lightcyanl
PMO012447	0.296309	0.392325	FALSE	lightcyanl
PMO013158	0.684782	0.157981	FALSE	lightcyanl
PMO013577	0.228338	0.446455	FALSE	lightcyanl
PMO014243	0.621149	0.191746	FALSE	lightcyanl
PMO014582	0.0646893	0.63762	FALSE	lightcyanl
PMO014597	0.140306	0.532114	FALSE	lightcyanl
PMO014838	0.185783	0.484948	FALSE	lightcyanl
PMO014945	0.129122	0.54504	FALSE	lightcyanl
PMO015048	0.253529	0.425508	FALSE	lightcyanl
PMO015495	0.0338142	0.705262	TRUE	lightcyanl
PMO016083	0.246855	0.430944	FALSE	lightcyanl
PMO016451	0.440004	0.295568	FALSE	lightcyanl
PMO016488	0.0573632	0.65138	FALSE	lightcyanl
PMO016560	0.111157	0.567283	FALSE	lightcyanl
PMO000691	0.089473	0.597246	FALSE	lightgreenl
PMO002136	0.0943794	0.590109	FALSE	lightgreenl
PMO002468	0.0844957	0.604737	FALSE	lightgreenl
PMO002996	0.319589	0.375303	FALSE	lightgreenl
PMO003017	0.0111621	0.790794	TRUE	lightgreenl
PMO003058	0.255888	0.423605	FALSE	lightgreenl
PMO003107	0.135028	0.538135	FALSE	lightgreenl
PMO004036	0.0376356	0.69515	TRUE	lightgreenl
PMO004076	0.377605	0.335385	FALSE	lightgreenl
PMO004473	0.298482	0.390708	FALSE	lightgreenl
PMO004489	0.134773	0.53843	FALSE	lightgreenl
PMO004597	0.0294729	0.717697	TRUE	lightgreenl
PMO004616	0.147549	0.524062	FALSE	lightgreenl
PMO004755	0.272703	0.4103	FALSE	lightgreenl
PMO004783	0.063501	0.639783	FALSE	lightgreenl
PMO005232	0.330222	0.367737	FALSE	lightgreenl
PMO005405	0.0441177	0.679418	TRUE	lightgreenl
PMO005646	0.05263	0.660873	FALSE	lightgreenl
PMO006062	0.0143123	0.774274	TRUE	lightgreenl
PMO006458	0.0500322	0.666315	FALSE	lightgreenl
PMO006509	0.0984716	0.584327	FALSE	lightgreenl
PMO007001	0.0850113	0.603949	FALSE	lightgreenl
PMO007118	0.540251	0.236415	FALSE	lightgreenl
PMO007286	0.0196354	0.751195	TRUE	lightgreenl
PMO007466	0.434759	0.298812	FALSE	lightgreenl
PMO007488	0.0347346	0.702761	TRUE	lightgreenl
PMO007549	0.0353877	0.701013	TRUE	lightgreenl
PMO007962	0.0386116	0.692675	TRUE	lightgreenl
PMO008069	0.368283	0.341588	FALSE	lightgreenl
PMO008087	0.00376753	0.849245	TRUE	lightgreenl
PMO008832	0.121774	0.5539	FALSE	lightgreenl
PMO010127	0.026086	0.728259	TRUE	lightgreenl
PMO010225	0.209071	0.463341	FALSE	lightgreenl
PMO010417	0.0355557	0.700566	TRUE	lightgreenl
PMO010589	0.0755224	0.618963	FALSE	lightgreenl
PMO010637	0.255333	0.424052	FALSE	lightgreenl
PMO010651	0.135972	0.537048	FALSE	lightgreenl
PMO010931	0.192156	0.478891	FALSE	lightgreenl
PMO011032	0.0271333	0.724902	TRUE	lightgreenl
PMO011202	0.213386	0.459487	FALSE	lightgreenl
PMO011221	0.0586161	0.648951	FALSE	lightgreenl
PMO011305	0.171814	0.49865	FALSE	lightgreenl
PMO012196	0.0168941	0.762474	TRUE	lightgreenl
PMO014396	0.0181919	0.756994	TRUE	lightgreenl
PMO014606	0.326689	0.370237	FALSE	lightgreenl
PMO014815	0.807661	0.0951286	FALSE	lightgreenl
PMO014881	0.0410163	0.686745	TRUE	lightgreenl
PMO014902	0.0620225	0.642509	FALSE	lightgreenl
PMO015024	0.0158656	0.76702	TRUE	lightgreenl
PMO015082	0.260972	0.419535	FALSE	lightgreenl
PMO015375	0.241738	0.435166	FALSE	lightgreenl
PMO015587	0.453323	0.287405	FALSE	lightgreenl
PMO015738	0.433689	0.299476	FALSE	lightgreenl
PMO015749	0.756744	0.12087	FALSE	lightgreenl
PMO015916	0.0107488	0.793185	TRUE	lightgreenl
PMO016055	0.406681	0.316485	FALSE	lightgreenl
PMO016284	0.0720865	0.624688	FALSE	lightgreenl
PMO016338	0.124863	0.550138	FALSE	lightgreenl
PMO016497	0.0573849	0.651338	FALSE	lightgreenl
PMO016620	0.48887	0.266108	FALSE	lightgreenl
PMO016663	0.0119421	0.786438	TRUE	lightgreenl
PMO016727	0.41413	0.311744	FALSE	lightgreenl
PMO016776	0.45127	0.288656	FALSE	lightgreenl
PMO016783	0.273498	0.409682	FALSE	lightgreenl
PMO000005	0.00485663	0.774204	TRUE	yellow
PMO000050	0.0500997	0.50847	FALSE	yellow
PMO000087	0.0684742	0.454517	FALSE	yellow
PMO000091	0.00644159	0.751914	TRUE	yellow
PMO000098	0.00535688	0.766703	TRUE	yellow
PMO000141	0.812602	-0.244222	FALSE	yellow
PMO000167	0.33576	0.0732805	FALSE	yellow
PMO000168	0.0158542	0.665044	TRUE	yellow
PMO000173	0.168461	0.263615	FALSE	yellow
PMO000197	0.0541386	0.495601	FALSE	yellow
PMO000199	0.166898	0.265899	FALSE	yellow
PMO000206	0.111896	0.357495	FALSE	yellow
PMO000229	0.0279373	0.595424	TRUE	yellow
PMO000235	0.0146211	0.673964	TRUE	yellow
PMO000318	0.0432498	0.531977	TRUE	yellow
PMO000326	0.0013429	0.852897	TRUE	yellow
PMO000330	0.048956	0.512239	TRUE	yellow
PMO000337	0.0483657	0.514207	TRUE	yellow
PMO000411	0.0176979	0.652533	TRUE	yellow
PMO000426	0.112393	0.356544	FALSE	yellow
PMO000563	0.10113	0.3788	FALSE	yellow
PMO000589	0.246858	0.163587	FALSE	yellow
PMO000616	0.236277	0.175712	FALSE	yellow
PMO000617	0.332617	0.0761809	FALSE	yellow
PMO000620	0.00648425	0.751367	TRUE	yellow
PMO000624	0.00183084	0.836887	TRUE	yellow
PMO000628	0.262333	0.146462	FALSE	yellow
PMO000656	0.00892098	0.72347	TRUE	yellow
PMO000662	7.6072e-07	0.987828	TRUE	yellow
PMO000685	0.000592288	0.888026	TRUE	yellow
PMO000717	0.163025	0.271622	FALSE	yellow
PMO000785	0.0153672	0.66851	TRUE	yellow
PMO000789	0.0755501	0.43634	FALSE	yellow
PMO000793	0.308268	0.099297	FALSE	yellow
PMO000794	0.00300804	0.807528	TRUE	yellow
PMO000810	0.253554	0.156091	FALSE	yellow
PMO000826	0.0362649	0.558666	TRUE	yellow
PMO000828	0.233065	0.179463	FALSE	yellow
PMO000858	0.00475766	0.775748	TRUE	yellow
PMO000879	0.0111224	0.702374	TRUE	yellow
PMO000901	0.206657	0.211705	FALSE	yellow
PMO000932	0.0524558	0.500882	FALSE	yellow
PMO000954	0.00510008	0.770492	TRUE	yellow
PMO000960	0.0235787	0.617664	TRUE	yellow
PMO000989	0.287494	0.120002	FALSE	yellow
PMO000996	0.00879259	0.724803	TRUE	yellow
PMO000997	0.544486	-0.0887654	FALSE	yellow
PMO001008	0.0477523	0.516269	TRUE	yellow
PMO001058	2.35597e-05	0.961777	TRUE	yellow
PMO001080	0.0454787	0.524072	TRUE	yellow
PMO001081	0.00102617	0.865514	TRUE	yellow
PMO001100	0.0131622	0.68519	TRUE	yellow
PMO001123	0.086158	0.411106	FALSE	yellow
PMO001162	0.00266038	0.815249	TRUE	yellow
PMO001243	0.513223	-0.067515	FALSE	yellow
PMO001265	0.165682	0.267687	FALSE	yellow
PMO001289	0.00266943	0.81504	TRUE	yellow
PMO001292	0.000775603	0.877496	TRUE	yellow
PMO001298	0.140229	0.30729	FALSE	yellow
PMO001328	0.222342	0.192246	FALSE	yellow
PMO001334	0.000306395	0.910113	TRUE	yellow
PMO001432	0.220426	0.194573	FALSE	yellow
PMO001438	0.0302591	0.584513	TRUE	yellow
PMO001465	0.000938088	0.869477	TRUE	yellow
PMO001514	0.0737926	0.440745	FALSE	yellow
PMO001535	0.214615	0.201714	FALSE	yellow
PMO001595	0.0376995	0.552921	TRUE	yellow
PMO001616	0.0208647	0.632935	TRUE	yellow
PMO001617	0.0360607	0.559496	TRUE	yellow
PMO001622	0.432433	-0.00827318	FALSE	yellow
PMO001623	7.05952e-05	0.944894	TRUE	yellow
PMO001645	0.0803245	0.424708	FALSE	yellow
PMO001647	0.6142	-0.133379	FALSE	yellow
PMO001707	0.028129	0.5945	TRUE	yellow
PMO001735	0.311666	0.0959996	FALSE	yellow
PMO001770	0.447427	-0.019795	FALSE	yellow
PMO001788	0.00873335	0.725422	TRUE	yellow
PMO001789	0.00014965	0.929211	TRUE	yellow
PMO001818	0.354729	0.0561473	FALSE	yellow
PMO001830	0.0732101	0.442221	FALSE	yellow
PMO001908	0.206861	0.211446	FALSE	yellow
PMO001995	0.00577841	0.760737	TRUE	yellow
PMO002025	0.0834044	0.417448	FALSE	yellow
PMO002026	0.0394337	0.546169	TRUE	yellow
PMO002059	0.0573651	0.485773	FALSE	yellow
PMO002065	0.00282421	0.811532	TRUE	yellow
PMO002094	0.0691275	0.452788	FALSE	yellow
PMO002117	0.000885292	0.871973	TRUE	yellow
PMO002125	0.0149908	0.671239	TRUE	yellow
PMO002253	0.01879	0.645529	TRUE	yellow
PMO002268	0.0177718	0.652051	TRUE	yellow
PMO002393	0.807255	-0.241487	FALSE	yellow
PMO002401	0.119522	0.343217	FALSE	yellow
PMO002420	0.00945153	0.718093	TRUE	yellow
PMO002421	0.059555	0.479311	FALSE	yellow
PMO002456	0.0151755	0.669895	TRUE	yellow
PMO002499	0.285825	0.121709	FALSE	yellow
PMO002516	0.000615443	0.886586	TRUE	yellow
PMO002517	0.00429462	0.783273	TRUE	yellow
PMO002547	0.0582053	0.483275	FALSE	yellow
PMO002552	0.117131	0.347627	FALSE	yellow
PMO002559	0.135872	0.314541	FALSE	yellow
PMO002563	0.0391844	0.547127	TRUE	yellow
PMO002659	0.211119	0.206072	FALSE	yellow
PMO002669	0.00141551	0.850293	TRUE	yellow
PMO002704	0.00254742	0.817902	TRUE	yellow
PMO002743	0.0787902	0.428395	FALSE	yellow
PMO002752	0.0469004	0.519163	TRUE	yellow
PMO002754	4.92324e-05	0.951132	TRUE	yellow
PMO002790	0.00921453	0.720469	TRUE	yellow
PMO002792	0.000804813	0.875977	TRUE	yellow
PMO002801	0.00639825	0.752471	TRUE	yellow
PMO002825	0.177624	0.250499	FALSE	yellow
PMO002857	0.0677717	0.456389	FALSE	yellow
PMO002999	0.239145	0.17239	FALSE	yellow
PMO003021	0.023921	0.615823	TRUE	yellow
PMO003048	0.0254471	0.607821	TRUE	yellow
PMO003052	0.00154518	0.845854	TRUE	yellow
PMO003054	0.0112993	0.700804	TRUE	yellow
PMO003071	0.00297777	0.808176	TRUE	yellow
PMO003074	0.00086106	0.873152	TRUE	yellow
PMO003075	0.007721	0.73647	TRUE	yellow
PMO003079	0.000266897	0.914154	TRUE	yellow
PMO003080	0.118078	0.345874	FALSE	yellow
PMO003092	0.027819	0.595996	TRUE	yellow
PMO003098	0.0989102	0.383378	FALSE	yellow
PMO003106	0.190476	0.232841	FALSE	yellow
PMO003112	0.00450418	0.779803	TRUE	yellow
PMO003139	0.00135912	0.852308	TRUE	yellow
PMO003146	0.0110823	0.702732	TRUE	yellow
PMO003184	0.00487881	0.77386	TRUE	yellow
PMO003203	0.174149	0.255419	FALSE	yellow
PMO003204	0.0252947	0.608605	TRUE	yellow
PMO003219	0.169476	0.262139	FALSE	yellow
PMO003223	0.00168034	0.841485	TRUE	yellow
PMO003230	0.0821701	0.420335	FALSE	yellow
PMO003246	0.00835981	0.729394	TRUE	yellow
PMO003248	0.442251	-0.0158475	FALSE	yellow
PMO003317	0.0716601	0.446185	FALSE	yellow
PMO003395	0.111274	0.358688	FALSE	yellow
PMO003430	0.00546744	0.765109	TRUE	yellow
PMO003440	0.00684112	0.746887	TRUE	yellow
PMO003448	0.0433411	0.531648	TRUE	yellow
PMO003487	0.00132725	0.853471	TRUE	yellow
PMO003506	0.0999568	0.381211	FALSE	yellow
PMO003510	0.542301	-0.0873072	FALSE	yellow
PMO003511	0.196429	0.22493	FALSE	yellow
PMO003532	0.145629	0.29851	FALSE	yellow
PMO003562	0.0144837	0.674988	TRUE	yellow
PMO003575	0.0847775	0.414268	FALSE	yellow
PMO003583	0.00555988	0.763792	TRUE	yellow
PMO003604	5.09906e-05	0.950557	TRUE	yellow
PMO003638	0.00861924	0.726623	TRUE	yellow
PMO003645	0.198628	0.222049	FALSE	yellow
PMO003652	0.110167	0.360821	FALSE	yellow
PMO003721	0.000144374	0.930053	TRUE	yellow
PMO003724	0.0600799	0.477786	FALSE	yellow
PMO003738	0.00838636	0.729108	TRUE	yellow
PMO003753	0.0233266	0.619031	TRUE	yellow
PMO003755	0.0177449	0.652226	TRUE	yellow
PMO003772	0.0278385	0.595901	TRUE	yellow
PMO003791	0.875858	-0.275704	FALSE	yellow
PMO003818	0.00907208	0.721917	TRUE	yellow
PMO003825	0.363843	0.0481322	FALSE	yellow
PMO003831	0.0510319	0.50544	FALSE	yellow
PMO003841	0.0123492	0.691811	TRUE	yellow
PMO003875	0.239974	0.171434	FALSE	yellow
PMO003917	0.016813	0.658424	TRUE	yellow
PMO003950	0.0683256	0.454912	FALSE	yellow
PMO003961	0.252773	0.156958	FALSE	yellow
PMO003962	0.0627573	0.470141	FALSE	yellow
PMO003989	0.696112	-0.181676	FALSE	yellow
PMO003998	0.0449808	0.525815	TRUE	yellow
PMO004029	0.0198952	0.638711	TRUE	yellow
PMO004042	0.00129327	0.854732	TRUE	yellow
PMO004086	0.000127061	0.932969	TRUE	yellow
PMO004094	0.00710954	0.743619	TRUE	yellow
PMO004117	0.00770839	0.736614	TRUE	yellow
PMO004126	0.00369667	0.793838	TRUE	yellow
PMO004127	0.0384129	0.550119	TRUE	yellow
PMO004179	0.00123029	0.85713	TRUE	yellow
PMO004192	0.423056	-0.000932059	FALSE	yellow
PMO004237	1.47945e-06	0.984807	TRUE	yellow
PMO004250	0.00908523	0.721783	TRUE	yellow
PMO004254	0.0192623	0.642583	TRUE	yellow
PMO004259	0.0131751	0.685088	TRUE	yellow
PMO004275	0.000749664	0.878877	TRUE	yellow
PMO004277	0.287141	0.120362	FALSE	yellow
PMO004282	0.0498217	0.50938	TRUE	yellow
PMO004291	0.00164457	0.842618	TRUE	yellow
PMO004295	0.00210084	0.829233	TRUE	yellow
PMO004299	0.0479175	0.515712	TRUE	yellow
PMO004349	0.00434832	0.782373	TRUE	yellow
PMO004353	0.00304224	0.806802	TRUE	yellow
PMO004414	0.046451	0.520704	TRUE	yellow
PMO004421	0.00581645	0.760214	TRUE	yellow
PMO004432	0.00599744	0.757752	TRUE	yellow
PMO004472	0.0318743	0.577248	TRUE	yellow
PMO004482	0.00103955	0.864932	TRUE	yellow
PMO004484	0.227667	0.185848	FALSE	yellow
PMO004524	0.0024533	0.820173	TRUE	yellow
PMO004545	0.0236955	0.617033	TRUE	yellow
PMO004547	0.00340431	0.799423	TRUE	yellow
PMO004619	0.111839	0.357603	FALSE	yellow
PMO004622	0.0424417	0.534911	TRUE	yellow
PMO004648	0.0109664	0.703771	TRUE	yellow
PMO004655	0.0356253	0.561276	TRUE	yellow
PMO004675	0.0944373	0.392816	FALSE	yellow
PMO004688	0.00601231	0.757552	TRUE	yellow
PMO004693	0.0449198	0.526029	TRUE	yellow
PMO004695	0.00357205	0.796181	TRUE	yellow
PMO004704	0.179492	0.24788	FALSE	yellow
PMO004731	0.00213784	0.828237	TRUE	yellow
PMO004732	0.0568032	0.487458	FALSE	yellow
PMO004756	0.229787	0.183329	FALSE	yellow
PMO004775	0.0353403	0.562449	TRUE	yellow
PMO004803	0.0902878	0.401843	FALSE	yellow
PMO004804	0.0151164	0.670324	TRUE	yellow
PMO004812	0.0143354	0.676102	TRUE	yellow
PMO004813	0.121308	0.339962	FALSE	yellow
PMO004847	0.112122	0.357062	FALSE	yellow
PMO004900	0.0130993	0.685692	TRUE	yellow
PMO004901	0.242158	0.168929	FALSE	yellow
PMO004903	0.0124027	0.691365	TRUE	yellow
PMO004963	0.0964827	0.388464	FALSE	yellow
PMO004964	0.128344	0.327441	FALSE	yellow
PMO004976	0.682798	-0.174094	FALSE	yellow
PMO004986	0.371403	0.0415848	FALSE	yellow
PMO005002	0.221702	0.193021	FALSE	yellow
PMO005057	0.446137	-0.0188139	FALSE	yellow
PMO005069	0.0252519	0.608826	TRUE	yellow
PMO005208	0.192702	0.229864	FALSE	yellow
PMO005241	0.205479	0.213205	FALSE	yellow
PMO005254	0.0482438	0.514616	TRUE	yellow
PMO005335	0.725269	-0.197949	FALSE	yellow
PMO005340	0.0108	0.705277	TRUE	yellow
PMO005396	0.034595	0.565547	TRUE	yellow
PMO005449	0.231521	0.181279	FALSE	yellow
PMO005578	0.482793	-0.0459857	FALSE	yellow
PMO005579	0.0413275	0.539017	TRUE	yellow
PMO005636	0.760858	-0.217232	FALSE	yellow
PMO005649	0.327211	0.0812136	FALSE	yellow
PMO005656	0.00720191	0.742513	TRUE	yellow
PMO005683	0.16057	0.275296	FALSE	yellow
PMO005794	0.0396184	0.545461	TRUE	yellow
PMO005799	0.103634	0.373713	FALSE	yellow
PMO005870	0.231744	0.181017	FALSE	yellow
PMO005890	0.0255371	0.607359	TRUE	yellow
PMO005954	0.460572	-0.0296852	FALSE	yellow
PMO005973	0.100763	0.379552	FALSE	yellow
PMO005994	0.455159	-0.025636	FALSE	yellow
PMO006043	0.232499	0.180129	FALSE	yellow
PMO006072	0.190509	0.232797	FALSE	yellow
PMO006076	0.0803163	0.424728	FALSE	yellow
PMO006123	0.187562	0.236773	FALSE	yellow
PMO006139	0.00299507	0.807806	TRUE	yellow
PMO006148	0.0222901	0.62476	TRUE	yellow
PMO006204	0.00763372	0.737467	TRUE	yellow
PMO006225	0.00621895	0.754805	TRUE	yellow
PMO006273	0.000405057	0.901347	TRUE	yellow
PMO006279	0.392128	0.0240791	FALSE	yellow
PMO006280	0.145519	0.298687	FALSE	yellow
PMO006287	0.00763507	0.737451	TRUE	yellow
PMO006297	4.75599e-05	0.951692	TRUE	yellow
PMO006344	0.00544126	0.765484	TRUE	yellow
PMO006357	0.00486944	0.774005	TRUE	yellow
PMO006365	0.0162078	0.662573	TRUE	yellow
PMO006368	0.201718	0.218036	FALSE	yellow
PMO006377	0.00548052	0.764922	TRUE	yellow
PMO006379	0.0579276	0.484098	FALSE	yellow
PMO006386	0.180651	0.246264	FALSE	yellow
PMO006442	0.000216899	0.919889	TRUE	yellow
PMO006452	0.0152148	0.66961	TRUE	yellow
PMO006453	0.00205282	0.830545	TRUE	yellow
PMO006480	0.00501164	0.771826	TRUE	yellow
PMO006506	0.00372134	0.79338	TRUE	yellow
PMO006507	0.0889162	0.404888	FALSE	yellow
PMO006508	0.0177406	0.652255	TRUE	yellow
PMO006514	0.158595	0.278281	FALSE	yellow
PMO006529	0.000238208	0.917347	TRUE	yellow
PMO006537	0.180565	0.246385	FALSE	yellow
PMO006557	0.00243398	0.820646	TRUE	yellow
PMO006591	0.00350973	0.797373	TRUE	yellow
PMO006592	0.0299337	0.586008	TRUE	yellow
PMO006594	0.0859025	0.411688	FALSE	yellow
PMO006601	0.00272493	0.813767	TRUE	yellow
PMO006604	0.0293093	0.588907	TRUE	yellow
PMO006627	0.00632739	0.753388	TRUE	yellow
PMO006671	0.0114441	0.699531	TRUE	yellow
PMO006690	0.00169042	0.841168	TRUE	yellow
PMO006694	0.0930884	0.395721	FALSE	yellow
PMO006725	0.160744	0.275035	FALSE	yellow
PMO006742	0.00536802	0.766541	TRUE	yellow
PMO006839	0.0109524	0.703898	TRUE	yellow
PMO006863	0.0649545	0.464028	FALSE	yellow
PMO006908	0.166509	0.26647	FALSE	yellow
PMO006919	0.121685	0.33928	FALSE	yellow
PMO006925	0.0129359	0.687005	TRUE	yellow
PMO006926	0.00547747	0.764965	TRUE	yellow
PMO007020	0.13892	0.309452	FALSE	yellow
PMO007040	0.300701	0.106728	FALSE	yellow
PMO007047	0.0292009	0.589414	TRUE	yellow
PMO007126	0.0543003	0.495099	FALSE	yellow
PMO007159	0.00374125	0.793012	TRUE	yellow
PMO007203	0.00845142	0.728409	TRUE	yellow
PMO007227	0.00205724	0.830423	TRUE	yellow
PMO007241	0.0990067	0.383177	FALSE	yellow
PMO007244	0.0707509	0.448537	FALSE	yellow
PMO007270	0.111868	0.357548	FALSE	yellow
PMO007277	0.00222744	0.82587	TRUE	yellow
PMO007278	0.110905	0.359396	FALSE	yellow
PMO007279	0.0488044	0.512743	TRUE	yellow
PMO007295	0.000999992	0.866667	TRUE	yellow
PMO007296	0.0328809	0.572844	TRUE	yellow
PMO007310	0.000165553	0.926788	TRUE	yellow
PMO007324	0.0180568	0.650201	TRUE	yellow
PMO007327	0.00989227	0.713777	TRUE	yellow
PMO007345	0.00255475	0.817727	TRUE	yellow
PMO007388	0.107764	0.365502	FALSE	yellow
PMO007424	0.0202109	0.63681	TRUE	yellow
PMO007453	0.0245967	0.612239	TRUE	yellow
PMO007515	0.21384	0.202676	FALSE	yellow
PMO007518	0.0053024	0.767496	TRUE	yellow
PMO007525	0.0284926	0.592761	TRUE	yellow
PMO007529	0.041293	0.539145	TRUE	yellow
PMO007530	0.0173626	0.654742	TRUE	yellow
PMO007536	0.0314928	0.578941	TRUE	yellow
PMO007537	0.0291804	0.58951	TRUE	yellow
PMO007572	0.597437	-0.122974	FALSE	yellow
PMO007629	0.305419	0.102081	FALSE	yellow
PMO007690	0.00252863	0.818351	TRUE	yellow
PMO007717	0.142876	0.302959	FALSE	yellow
PMO007728	0.262213	0.146592	FALSE	yellow
PMO007740	0.134678	0.316554	FALSE	yellow
PMO007771	0.0408117	0.540942	TRUE	yellow
PMO007816	0.00169487	0.841029	TRUE	yellow
PMO007844	0.215164	0.201034	FALSE	yellow
PMO007858	0.0329508	0.572541	TRUE	yellow
PMO007892	0.00794087	0.733992	TRUE	yellow
PMO007893	0.064489	0.465312	FALSE	yellow
PMO007906	0.0675921	0.45687	FALSE	yellow
PMO007996	0.177274	0.250991	FALSE	yellow
PMO008006	0.00742641	0.739865	TRUE	yellow
PMO008007	0.192174	0.230568	FALSE	yellow
PMO008057	0.0519261	0.502568	FALSE	yellow
PMO008075	0.134458	0.316926	FALSE	yellow
PMO008109	8.23166e-05	0.941999	TRUE	yellow
PMO008160	0.458298	-0.0279877	FALSE	yellow
PMO008246	0.743675	-0.207999	FALSE	yellow
PMO008362	0.0103868	0.709085	TRUE	yellow
PMO008382	0.0707057	0.448655	FALSE	yellow
PMO008402	0.00209618	0.82936	TRUE	yellow
PMO008416	0.129257	0.325849	FALSE	yellow
PMO008419	0.0500629	0.50859	FALSE	yellow
PMO008484	0.0511056	0.505202	FALSE	yellow
PMO008485	0.439403	-0.0136616	FALSE	yellow
PMO008507	0.00423361	0.784304	TRUE	yellow
PMO008513	0.13476	0.316415	FALSE	yellow
PMO008545	0.16501	0.268678	FALSE	yellow
PMO008553	0.395635	0.0211778	FALSE	yellow
PMO008569	0.452409	-0.0235656	FALSE	yellow
PMO008575	0.0282756	0.593797	TRUE	yellow
PMO008624	0.105987	0.369008	FALSE	yellow
PMO008653	0.205145	0.213632	FALSE	yellow
PMO008708	0.00637561	0.752763	TRUE	yellow
PMO008725	0.0454541	0.524157	TRUE	yellow
PMO008726	0.050955	0.505688	FALSE	yellow
PMO008782	0.106139	0.368707	FALSE	yellow
PMO008806	0.0166134	0.659781	TRUE	yellow
PMO008844	0.0801291	0.425175	FALSE	yellow
PMO008849	0.67538	-0.169826	FALSE	yellow
PMO008879	0.00259254	0.816833	TRUE	yellow
PMO008890	0.00876514	0.725089	TRUE	yellow
PMO008893	0.116218	0.349326	FALSE	yellow
PMO008902	0.204181	0.214866	FALSE	yellow
PMO008930	0.00394878	0.789254	TRUE	yellow
PMO008935	0.0810948	0.422875	FALSE	yellow
PMO008937	0.00876247	0.725117	TRUE	yellow
PMO008961	0.0489542	0.512245	TRUE	yellow
PMO009006	0.000463447	0.896818	TRUE	yellow
PMO009055	0.118587	0.344934	FALSE	yellow
PMO009061	0.00111077	0.861915	TRUE	yellow
PMO009071	0.0471619	0.518271	TRUE	yellow
PMO009072	0.115996	0.349741	FALSE	yellow
PMO009082	0.257745	0.151467	FALSE	yellow
PMO009125	0.0979613	0.385356	FALSE	yellow
PMO009149	0.00808737	0.732366	TRUE	yellow
PMO009154	0.00433678	0.782566	TRUE	yellow
PMO009161	0.00421101	0.784688	TRUE	yellow
PMO009162	0.18239	0.243854	FALSE	yellow
PMO009169	0.00675752	0.747922	TRUE	yellow
PMO009178	0.300803	0.106627	FALSE	yellow
PMO009189	0.0286926	0.59181	TRUE	yellow
PMO009227	0.500453	-0.0585865	FALSE	yellow
PMO009271	0.0399209	0.544307	TRUE	yellow
PMO009273	0.0553125	0.491981	FALSE	yellow
PMO009302	0.393578	0.0228778	FALSE	yellow
PMO009326	0.178221	0.24966	FALSE	yellow
PMO009354	0.177915	0.250089	FALSE	yellow
PMO009395	0.0530194	0.499101	FALSE	yellow
PMO009398	0.0334559	0.570368	TRUE	yellow
PMO009459	0.0211897	0.631039	TRUE	yellow
PMO009482	0.355279	0.0556595	FALSE	yellow
PMO009500	0.0437037	0.530346	TRUE	yellow
PMO009542	0.060817	0.475659	FALSE	yellow
PMO009543	0.0282392	0.593972	TRUE	yellow
PMO009574	0.011953	0.695142	TRUE	yellow
PMO009587	0.0327183	0.573549	TRUE	yellow
PMO009588	0.0167417	0.658908	TRUE	yellow
PMO009596	0.0142747	0.67656	TRUE	yellow
PMO009603	0.302336	0.105112	FALSE	yellow
PMO009612	0.00243493	0.820623	TRUE	yellow
PMO009681	0.438848	-0.0132349	FALSE	yellow
PMO009703	0.404975	0.0135353	FALSE	yellow
PMO009726	0.0474316	0.517355	TRUE	yellow
PMO009739	0.0121975	0.693077	TRUE	yellow
PMO009759	0.269042	0.139246	FALSE	yellow
PMO009767	0.0213868	0.629899	TRUE	yellow
PMO009779	0.023271	0.619335	TRUE	yellow
PMO009802	0.356858	0.0542629	FALSE	yellow
PMO009836	0.041636	0.537873	TRUE	yellow
PMO009913	0.211309	0.205833	FALSE	yellow
PMO009967	0.196255	0.225159	FALSE	yellow
PMO009982	0.0314364	0.579193	TRUE	yellow
PMO010053	0.0870934	0.408982	FALSE	yellow
PMO010121	0.00310041	0.805578	TRUE	yellow
PMO010122	0.047458	0.517265	TRUE	yellow
PMO010218	0.0134044	0.683271	TRUE	yellow
PMO010222	0.00151734	0.846785	TRUE	yellow
PMO010299	0.0698	0.451019	FALSE	yellow
PMO010313	0.107304	0.366406	FALSE	yellow
PMO010323	0.560086	-0.0990659	FALSE	yellow
PMO010333	0.441117	-0.0149779	FALSE	yellow
PMO010355	0.0842109	0.415576	FALSE	yellow
PMO010358	0.28264	0.124982	FALSE	yellow
PMO010408	0.260363	0.148604	FALSE	yellow
PMO010431	0.00622478	0.754729	TRUE	yellow
PMO010441	0.462276	-0.0309537	FALSE	yellow
PMO010442	0.243494	0.167403	FALSE	yellow
PMO010479	0.0834987	0.417228	FALSE	yellow
PMO010506	0.0107308	0.705909	TRUE	yellow
PMO010557	0.021151	0.631264	TRUE	yellow
PMO010560	0.429062	-0.00564635	FALSE	yellow
PMO010569	0.00306169	0.806391	TRUE	yellow
PMO010573	0.116818	0.348209	FALSE	yellow
PMO010578	0.180767	0.246103	FALSE	yellow
PMO010598	0.0544802	0.494542	FALSE	yellow
PMO010599	0.12179	0.33909	FALSE	yellow
PMO010604	0.00415234	0.785693	TRUE	yellow
PMO010672	0.0911054	0.400043	FALSE	yellow
PMO010674	0.0405364	0.541977	TRUE	yellow
PMO010690	0.0528701	0.499571	FALSE	yellow
PMO010694	0.0136324	0.681485	TRUE	yellow
PMO010709	0.0191658	0.643181	TRUE	yellow
PMO010725	0.0335936	0.56978	TRUE	yellow
PMO010739	0.0390614	0.547601	TRUE	yellow
PMO010801	0.114167	0.353176	FALSE	yellow
PMO010824	0.0221111	0.625767	TRUE	yellow
PMO010854	0.0964697	0.388492	FALSE	yellow
PMO010857	0.00433941	0.782522	TRUE	yellow
PMO010878	0.00476021	0.775708	TRUE	yellow
PMO010897	0.0206144	0.634409	TRUE	yellow
PMO010924	0.00347818	0.797982	TRUE	yellow
PMO010948	0.229607	0.183542	FALSE	yellow
PMO010951	0.00418425	0.785145	TRUE	yellow
PMO010968	0.043119	0.53245	TRUE	yellow
PMO010978	0.406067	0.0126496	FALSE	yellow
PMO010983	0.00316672	0.804202	TRUE	yellow
PMO010988	0.104159	0.372657	FALSE	yellow
PMO010995	0.33714	0.0720121	FALSE	yellow
PMO011004	0.267867	0.140501	FALSE	yellow
PMO011009	0.581008	-0.112584	FALSE	yellow
PMO011018	0.581308	-0.112775	FALSE	yellow
PMO011153	0.137292	0.31216	FALSE	yellow
PMO011170	0.074687	0.438495	FALSE	yellow
PMO011201	0.0601074	0.477706	FALSE	yellow
PMO011277	0.391987	0.0241956	FALSE	yellow
PMO011325	0.195087	0.2267	FALSE	yellow
PMO011365	0.325087	0.0832054	FALSE	yellow
PMO011383	0.0145396	0.674571	TRUE	yellow
PMO011389	0.68683	-0.176401	FALSE	yellow
PMO011443	0.408928	0.010336	FALSE	yellow
PMO011444	0.111075	0.35907	FALSE	yellow
PMO011466	0.00306464	0.806329	TRUE	yellow
PMO011467	0.00885109	0.724194	TRUE	yellow
PMO011468	0.0179505	0.650889	TRUE	yellow
PMO011498	0.219371	0.195859	FALSE	yellow
PMO011512	0.0150796	0.670591	TRUE	yellow
PMO011549	0.0475325	0.517013	TRUE	yellow
PMO011644	0.0646926	0.46475	FALSE	yellow
PMO011677	0.00128765	0.854943	TRUE	yellow
PMO011682	0.0260727	0.604633	TRUE	yellow
PMO011690	0.025876	0.605629	TRUE	yellow
PMO011703	0.0513289	0.504482	FALSE	yellow
PMO011773	0.274619	0.13334	FALSE	yellow
PMO011838	0.12013	0.342107	FALSE	yellow
PMO011867	0.00445818	0.780556	TRUE	yellow
PMO011914	0.165121	0.268514	FALSE	yellow
PMO011918	0.194682	0.227235	FALSE	yellow
PMO011924	0.283752	0.123837	FALSE	yellow
PMO011926	0.000989286	0.867145	TRUE	yellow
PMO011961	0.0137057	0.680916	TRUE	yellow
PMO011989	0.0029349	0.809101	TRUE	yellow
PMO011997	0.0294651	0.588179	TRUE	yellow
PMO012003	0.00128953	0.854873	TRUE	yellow
PMO012013	0.074125	0.439907	FALSE	yellow
PMO012022	0.168219	0.263968	FALSE	yellow
PMO012042	0.0484618	0.513886	TRUE	yellow
PMO012044	0.00182563	0.837042	TRUE	yellow
PMO012063	0.036724	0.556811	TRUE	yellow
PMO012082	0.0952391	0.391103	FALSE	yellow
PMO012089	0.00385024	0.791022	TRUE	yellow
PMO012093	0.0235345	0.617903	TRUE	yellow
PMO012104	0.063045	0.469333	FALSE	yellow
PMO012117	0.0350736	0.563552	TRUE	yellow
PMO012122	0.172595	0.25764	FALSE	yellow
PMO012159	0.615813	-0.134371	FALSE	yellow
PMO012209	0.86779	-0.271775	FALSE	yellow
PMO012232	0.315188	0.0926068	FALSE	yellow
PMO012256	0.0274947	0.597572	TRUE	yellow
PMO012257	0.0285538	0.59247	TRUE	yellow
PMO012258	0.0799679	0.425561	FALSE	yellow
PMO012263	0.155175	0.283506	FALSE	yellow
PMO012291	0.0160301	0.663811	TRUE	yellow
PMO012310	0.0419218	0.536817	TRUE	yellow
PMO012321	3.53875e-05	0.956225	TRUE	yellow
PMO012329	0.0781346	0.429985	FALSE	yellow
PMO012366	0.0117742	0.69667	TRUE	yellow
PMO012377	0.382967	0.0317388	FALSE	yellow
PMO012402	0.0415102	0.538339	TRUE	yellow
PMO012420	0.0242077	0.614294	TRUE	yellow
PMO012426	0.00235461	0.822617	TRUE	yellow
PMO012433	0.0610649	0.474948	FALSE	yellow
PMO012440	0.0236312	0.61738	TRUE	yellow
PMO012455	0.0973761	0.386582	FALSE	yellow
PMO012459	0.187506	0.236849	FALSE	yellow
PMO012478	0.131211	0.32247	FALSE	yellow
PMO012501	0.0115534	0.698577	TRUE	yellow
PMO012506	0.0114905	0.699125	TRUE	yellow
PMO012527	0.00711615	0.74354	TRUE	yellow
PMO012548	0.079476	0.426741	FALSE	yellow
PMO012586	0.0126559	0.68928	TRUE	yellow
PMO012591	0.0551984	0.492331	FALSE	yellow
PMO012595	0.0137325	0.680708	TRUE	yellow
PMO012600	0.0257535	0.606253	TRUE	yellow
PMO012608	0.00785232	0.734984	TRUE	yellow
PMO012611	0.0286703	0.591916	TRUE	yellow
PMO012629	0.0148582	0.672211	TRUE	yellow
PMO012729	0.101259	0.378535	FALSE	yellow
PMO012739	0.292633	0.114789	FALSE	yellow
PMO012741	0.127929	0.328166	FALSE	yellow
PMO012760	0.018046	0.650271	TRUE	yellow
PMO012807	0.00433191	0.782647	TRUE	yellow
PMO012912	0.000533846	0.891837	TRUE	yellow
PMO012995	0.0939465	0.39387	FALSE	yellow
PMO012996	0.115558	0.35056	FALSE	yellow
PMO012998	0.0248117	0.611112	TRUE	yellow
PMO013048	0.674078	-0.169074	FALSE	yellow
PMO013071	0.0110581	0.702948	TRUE	yellow
PMO013163	0.358606	0.0527209	FALSE	yellow
PMO013177	0.0428703	0.53335	TRUE	yellow
PMO013227	0.0654858	0.462571	FALSE	yellow
PMO013228	0.0358099	0.560519	TRUE	yellow
PMO013247	0.0198083	0.639238	TRUE	yellow
PMO013281	0.0574958	0.485383	FALSE	yellow
PMO013311	0.0334905	0.57022	TRUE	yellow
PMO013325	0.355125	0.0557959	FALSE	yellow
PMO013333	0.015397	0.668296	TRUE	yellow
PMO013374	0.00386149	0.790818	TRUE	yellow
PMO013401	0.314865	0.0929171	FALSE	yellow
PMO013444	0.242701	0.168308	FALSE	yellow
PMO013456	0.0585176	0.482352	FALSE	yellow
PMO013469	0.0311808	0.580336	TRUE	yellow
PMO013488	0.0135967	0.681764	TRUE	yellow
PMO013500	0.0370973	0.555315	TRUE	yellow
PMO013502	0.0126647	0.689208	TRUE	yellow
PMO013537	0.234961	0.177245	FALSE	yellow
PMO013545	0.153939	0.285413	FALSE	yellow
PMO013547	0.013616	0.681613	TRUE	yellow
PMO013553	0.251229	0.158678	FALSE	yellow
PMO013559	0.0723314	0.444461	FALSE	yellow
PMO013563	0.0160336	0.663786	TRUE	yellow
PMO013581	0.12705	0.329709	FALSE	yellow
PMO013582	0.0267348	0.601314	TRUE	yellow
PMO013592	5.72466e-05	0.948613	TRUE	yellow
PMO013612	0.687133	-0.176574	FALSE	yellow
PMO013613	0.050188	0.508181	FALSE	yellow
PMO013644	0.167445	0.265097	FALSE	yellow
PMO013646	0.0821079	0.420482	FALSE	yellow
PMO013666	0.0218528	0.62723	TRUE	yellow
PMO013677	0.0522789	0.501444	FALSE	yellow
PMO013681	0.00818373	0.731307	TRUE	yellow
PMO013722	0.0794362	0.426837	FALSE	yellow
PMO013752	0.482733	-0.0459424	FALSE	yellow
PMO013825	0.22762	0.185904	FALSE	yellow
PMO013837	0.721687	-0.195974	FALSE	yellow
PMO013847	0.0220683	0.626009	TRUE	yellow
PMO013881	0.0339093	0.568436	TRUE	yellow
PMO013998	0.0606798	0.476054	FALSE	yellow
PMO014028	0.0108914	0.704448	TRUE	yellow
PMO014035	0.00266164	0.81522	TRUE	yellow
PMO014075	0.00422641	0.784426	TRUE	yellow
PMO014077	0.00155684	0.845468	TRUE	yellow
PMO014082	0.52682	-0.0768607	FALSE	yellow
PMO014124	0.0498904	0.509155	TRUE	yellow
PMO014131	0.0648293	0.464373	FALSE	yellow
PMO014140	0.00444795	0.780724	TRUE	yellow
PMO014171	0.305955	0.101555	FALSE	yellow
PMO014180	0.026058	0.604707	TRUE	yellow
PMO014196	0.0143285	0.676154	TRUE	yellow
PMO014256	0.0472958	0.517816	TRUE	yellow
PMO014270	0.551495	-0.0934174	FALSE	yellow
PMO014291	0.00175594	0.839142	TRUE	yellow
PMO014306	0.210904	0.206342	FALSE	yellow
PMO014308	0.17426	0.255261	FALSE	yellow
PMO014338	6.96372e-06	0.974538	TRUE	yellow
PMO014374	0.00765879	0.73718	TRUE	yellow
PMO014392	0.0108811	0.704542	TRUE	yellow
PMO014409	0.100092	0.380933	FALSE	yellow
PMO014412	0.000286493	0.912102	TRUE	yellow
PMO014504	0.628239	-0.14195	FALSE	yellow
PMO014513	0.076698	0.4335	FALSE	yellow
PMO014534	0.383436	0.031344	FALSE	yellow
PMO014580	0.0104741	0.708272	TRUE	yellow
PMO014581	0.00637774	0.752736	TRUE	yellow
PMO014583	0.0304335	0.583716	TRUE	yellow
PMO014586	0.00400718	0.78822	TRUE	yellow
PMO014602	0.00958541	0.716768	TRUE	yellow
PMO014608	0.0170261	0.656987	TRUE	yellow
PMO014616	0.0323793	0.575027	TRUE	yellow
PMO014625	8.45973e-05	0.941468	TRUE	yellow
PMO014631	0.028146	0.594419	TRUE	yellow
PMO014633	0.0936315	0.394548	FALSE	yellow
PMO014634	0.101387	0.378274	FALSE	yellow
PMO014655	0.00411325	0.786368	TRUE	yellow
PMO014664	0.00168398	0.84137	TRUE	yellow
PMO014667	0.00783003	0.735235	TRUE	yellow
PMO014673	0.000792083	0.876634	TRUE	yellow
PMO014684	0.528344	-0.0778981	FALSE	yellow
PMO014686	0.0473804	0.517528	TRUE	yellow
PMO014714	0.240231	0.171139	FALSE	yellow
PMO014737	0.0633201	0.468562	FALSE	yellow
PMO014741	0.273114	0.134926	FALSE	yellow
PMO014790	0.0637098	0.467474	FALSE	yellow
PMO014801	0.00191314	0.834479	TRUE	yellow
PMO014803	0.00583365	0.759977	TRUE	yellow
PMO014812	0.00314905	0.804567	TRUE	yellow
PMO014824	0.144143	0.300905	FALSE	yellow
PMO014831	0.0992464	0.38268	FALSE	yellow
PMO014844	0.00976106	0.715048	TRUE	yellow
PMO014857	0.251016	0.158916	FALSE	yellow
PMO014869	0.131	0.322834	FALSE	yellow
PMO014877	0.0163503	0.661587	TRUE	yellow
PMO014878	0.000484673	0.895266	TRUE	yellow
PMO014882	0.0104483	0.708512	TRUE	yellow
PMO014887	0.0860023	0.411461	FALSE	yellow
PMO014891	0.0857051	0.412139	FALSE	yellow
PMO014894	0.0162196	0.662491	TRUE	yellow
PMO014950	0.0228425	0.621685	TRUE	yellow
PMO015007	0.0116285	0.697926	TRUE	yellow
PMO015019	0.00489932	0.773544	TRUE	yellow
PMO015025	0.0649258	0.464107	FALSE	yellow
PMO015030	0.0593323	0.479961	FALSE	yellow
PMO015042	0.153764	0.285685	FALSE	yellow
PMO015052	0.0639642	0.466766	FALSE	yellow
PMO015079	0.0359823	0.559815	TRUE	yellow
PMO015130	0.135453	0.315246	FALSE	yellow
PMO015174	0.192197	0.230537	FALSE	yellow
PMO015243	0.122403	0.337983	FALSE	yellow
PMO015261	0.0703825	0.449496	FALSE	yellow
PMO015266	0.038054	0.551524	TRUE	yellow
PMO015337	0.0391647	0.547203	TRUE	yellow
PMO015355	0.87363	-0.274621	FALSE	yellow
PMO015356	0.135757	0.314734	FALSE	yellow
PMO015361	0.138812	0.309631	FALSE	yellow
PMO015391	0.00282377	0.811542	TRUE	yellow
PMO015419	0.128821	0.326609	FALSE	yellow
PMO015423	0.0889755	0.404755	FALSE	yellow
PMO015431	0.00532196	0.767211	TRUE	yellow
PMO015481	0.114069	0.353362	FALSE	yellow
PMO015496	0.155042	0.28371	FALSE	yellow
PMO015554	0.0667278	0.459195	FALSE	yellow
PMO015561	0.0316158	0.578394	TRUE	yellow
PMO015582	0.497447	-0.0564631	FALSE	yellow
PMO015585	0.0564891	0.488404	FALSE	yellow
PMO015601	0.0084574	0.728345	TRUE	yellow
PMO015608	0.0571746	0.486343	FALSE	yellow
PMO015610	0.0206555	0.634166	TRUE	yellow
PMO015624	0.0632012	0.468895	FALSE	yellow
PMO015679	0.00263312	0.815882	TRUE	yellow
PMO015683	0.0268408	0.600788	TRUE	yellow
PMO015689	0.00562146	0.762924	TRUE	yellow
PMO015712	0.037171	0.55502	TRUE	yellow
PMO015719	0.442181	-0.0157937	FALSE	yellow
PMO015779	0.0427378	0.533832	TRUE	yellow
PMO015790	0.590391	-0.118541	FALSE	yellow
PMO015818	0.0698451	0.450901	FALSE	yellow
PMO015890	0.187427	0.236957	FALSE	yellow
PMO015891	0.322184	0.0859426	FALSE	yellow
PMO015899	0.0214575	0.629491	TRUE	yellow
PMO015956	0.00378116	0.792279	TRUE	yellow
PMO015965	0.140914	0.306164	FALSE	yellow
PMO015993	0.0259555	0.605226	TRUE	yellow
PMO015994	0.140483	0.306872	FALSE	yellow
PMO016000	0.0893827	0.403849	FALSE	yellow
PMO016001	0.335103	0.073885	FALSE	yellow
PMO016002	0.114765	0.35205	FALSE	yellow
PMO016004	0.0460419	0.522115	TRUE	yellow
PMO016069	0.0514588	0.504064	FALSE	yellow
PMO016086	0.177717	0.250367	FALSE	yellow
PMO016108	0.542204	-0.087242	FALSE	yellow
PMO016115	0.0160723	0.663516	TRUE	yellow
PMO016118	0.0989624	0.383269	FALSE	yellow
PMO016203	0.039453	0.546094	TRUE	yellow
PMO016216	0.00885524	0.724151	TRUE	yellow
PMO016221	0.0133736	0.683514	TRUE	yellow
PMO016240	0.0893284	0.403969	FALSE	yellow
PMO016241	0.233179	0.17933	FALSE	yellow
PMO016244	0.049821	0.509383	TRUE	yellow
PMO016269	0.130342	0.323968	FALSE	yellow
PMO016270	0.149415	0.292483	FALSE	yellow
PMO016308	0.67366	-0.168833	FALSE	yellow
PMO016335	0.00665348	0.749223	TRUE	yellow
PMO016342	0.0641951	0.466125	FALSE	yellow
PMO016354	0.129272	0.325823	FALSE	yellow
PMO016392	0.0223538	0.624403	TRUE	yellow
PMO016455	0.0442719	0.528319	TRUE	yellow
PMO016456	0.0871629	0.408825	FALSE	yellow
PMO016503	0.0135339	0.682254	TRUE	yellow
PMO016520	0.0650717	0.463706	FALSE	yellow
PMO016559	0.395014	0.0216907	FALSE	yellow
PMO016619	0.15789	0.279352	FALSE	yellow
PMO016694	0.0376411	0.553152	TRUE	yellow
PMO016812	0.418895	0.00236049	FALSE	yellow
PMO016849	0.241074	0.170171	FALSE	yellow
PMO016904	0.803527	-0.239573	FALSE	yellow
PMO017011	0.00155781	0.845435	TRUE	yellow
PMO017014	0.00309608	0.805669	TRUE	yellow

## Sheet: Figure 2D
group1	group	reinforce	reverse	all
1	flight_wgcna	4	197	201
3	heart_wgcna	3	56	59
1	flight_wgcna_raw	36	209	245
3	heart_wgcna_raw	15	60	75

## Sheet: Figure 2E
Cutoff	Gene number
0.5_flight_reinforce	22
1_flight_reinforce	5
1.5_flight_reinforce	6
2_flight_reinforce	3
0.5_flight_reverse	69
1_flight_reverse	16
1.5_flight_reverse	20
2_flight_reverse	104

## Sheet: Figure 2F
Cutoff	Gene number
0.5_heart_reinforce	6
1_heart_reinforce	3
1.5_heart_reinforce	3
2_heart_reinforce	3
0.5_heart_reverse	33
1_heart_reverse	5
1.5_heart_reverse	2
2_heart_reverse	20
