# Supplementary material for: Gene expression plasticity followed by genetic change during colonization in a high-elevation environment
Source: eLife. 2024 Mar 12;12:RP86687. doi: 10.7554/eLife.86687 (PMC10932543; doi:10.7554/eLife.86687)
Supplement: Figure 3—source data 1. [file elife-86687-fig3-data1.xlsx]

## Sheet: Figure 3B & 3C
Genes	group1.x	P	R2	group.x	group2	group.y
PMO000001	f_capperfiber	0.237508	0.647489	FALSE	none	NA
PMO000002	f_capperfiber	0.293607	0.591347	FALSE	none	NA
PMO000003	f_capperfiber	0.877932	0.0960194	FALSE	none	NA
PMO000004	f_capperfiber	0.470194	0.429728	FALSE	none	NA
PMO000005	f_capperfiber	0.185062	-0.703371	FALSE	none	NA
PMO000006	f_capperfiber	0.547796	0.36332	FALSE	none	NA
PMO000007	f_capperfiber	0.333325	-0.5533	FALSE	none	NA
PMO000008	f_capperfiber	0.589521	0.328391	FALSE	none	NA
PMO000009	f_capperfiber	0.322132	-0.5639	FALSE	none	NA
PMO000010	f_capperfiber	0.477589	0.423306	FALSE	none	NA
PMO000011	f_capperfiber	0.0824697	0.829285	FALSE	none	NA
PMO000013	f_capperfiber	0.335105	-0.551623	FALSE	none	NA
PMO000014	f_capperfiber	0.537922	-0.371658	FALSE	none	NA
PMO000015	f_capperfiber	0.865165	0.106099	FALSE	none	NA
PMO000019	f_capperfiber	0.724296	-0.218283	FALSE	none	NA
PMO000020	f_capperfiber	0.758301	0.190998	FALSE	none	NA
PMO000022	f_capperfiber	0.471859	-0.42828	FALSE	none	NA
PMO000025	f_capperfiber	0.319178	-0.566712	FALSE	none	NA
PMO000026	f_capperfiber	0.281581	-0.603123	FALSE	none	NA
PMO000027	f_capperfiber	0.950733	0.038704	FALSE	none	NA
PMO000028	f_capperfiber	0.252921	-0.631741	FALSE	none	NA
PMO000029	f_capperfiber	0.0195784	-0.935265	TRUE	N	re
PMO000031	f_capperfiber	0.603079	-0.317141	FALSE	none	NA
PMO000032	f_capperfiber	0.498726	-0.405067	FALSE	none	NA
PMO000033	f_capperfiber	0.376985	0.512767	FALSE	none	NA
PMO000036	f_capperfiber	0.863706	0.107251	FALSE	none	NA
PMO000037	f_capperfiber	0.667354	-0.264373	FALSE	none	NA
PMO000038	f_capperfiber	0.318954	-0.566926	FALSE	none	NA
PMO000039	f_capperfiber	0.827773	-0.135684	FALSE	none	NA
PMO000040	f_capperfiber	0.179793	-0.709217	FALSE	none	NA
PMO000041	f_capperfiber	0.607679	0.313334	FALSE	none	NA
PMO000042	f_capperfiber	0.188138	-0.69998	FALSE	none	NA
PMO000043	f_capperfiber	0.107041	-0.796151	FALSE	none	NA
PMO000044	f_capperfiber	0.133928	-0.762443	FALSE	none	NA
PMO000045	f_capperfiber	0.342494	-0.544684	FALSE	none	NA
PMO000046	f_capperfiber	0.357571	-0.530641	FALSE	none	NA
PMO000047	f_capperfiber	0.805632	0.153258	FALSE	none	NA
PMO000048	f_capperfiber	0.0551619	0.869991	FALSE	none	NA
PMO000049	f_capperfiber	0.758058	0.191192	FALSE	none	NA
PMO000050	f_capperfiber	0.246872	-0.637889	FALSE	none	NA
PMO000052	f_capperfiber	0.250219	-0.634482	FALSE	none	NA
PMO000053	f_capperfiber	0.366288	-0.522586	FALSE	none	NA
PMO000054	f_capperfiber	0.242575	-0.642282	FALSE	none	NA
PMO000055	f_capperfiber	0.0886536	-0.820691	FALSE	none	NA
PMO000056	f_capperfiber	0.695891	0.241206	FALSE	none	NA
PMO000057	f_capperfiber	0.167915	-0.722579	FALSE	none	NA
PMO000058	f_capperfiber	0.662475	0.268348	FALSE	none	NA
PMO000059	f_capperfiber	0.410661	0.482274	FALSE	none	NA
PMO000060	f_capperfiber	0.29535	-0.58965	FALSE	none	NA
PMO000063	f_capperfiber	0.682091	-0.252391	FALSE	none	NA
PMO000064	f_capperfiber	0.357533	0.530676	FALSE	none	NA
PMO000065	f_capperfiber	0.384413	0.505988	FALSE	none	NA
PMO000066	f_capperfiber	0.0968734	-0.809546	FALSE	none	NA
PMO000067	f_capperfiber	0.512233	-0.393496	FALSE	none	NA
PMO000068	f_capperfiber	0.738627	-0.206765	FALSE	none	NA
PMO000070	f_capperfiber	0.527365	-0.380606	FALSE	none	NA
PMO000073	f_capperfiber	0.438421	-0.457574	FALSE	none	NA
PMO000074	f_capperfiber	0.50626	-0.398605	FALSE	none	NA
PMO000075	f_capperfiber	0.205842	-0.680759	FALSE	none	NA
PMO000076	f_capperfiber	0.365864	-0.522978	FALSE	none	NA
PMO000078	f_capperfiber	0.353437	-0.534476	FALSE	none	NA
PMO000080	f_capperfiber	0.277186	-0.607459	FALSE	none	NA
PMO000081	f_capperfiber	0.873446	-0.0995604	FALSE	none	NA
PMO000082	f_capperfiber	0.165948	-0.724818	FALSE	none	NA
PMO000083	f_capperfiber	0.505652	-0.399126	FALSE	none	NA
PMO000086	f_capperfiber	0.291953	-0.592958	FALSE	none	NA
PMO000087	f_capperfiber	0.177703	-0.71155	FALSE	none	NA
PMO000088	f_capperfiber	0.260392	-0.624201	FALSE	none	NA
PMO000089	f_capperfiber	0.262331	-0.622253	FALSE	none	NA
PMO000090	f_capperfiber	0.229768	-0.655501	FALSE	none	NA
PMO000091	f_capperfiber	0.114466	-0.786612	FALSE	none	NA
PMO000094	f_capperfiber	0.138262	-0.757207	FALSE	none	NA
PMO000095	f_capperfiber	0.184632	-0.703846	FALSE	none	NA
PMO000096	f_capperfiber	0.277331	-0.607316	FALSE	none	NA
PMO000097	f_capperfiber	0.368159	-0.520865	FALSE	none	NA
PMO000098	f_capperfiber	0.448729	0.448492	FALSE	none	NA
PMO000099	f_capperfiber	0.139577	-0.755628	FALSE	none	NA
PMO000100	f_capperfiber	0.856544	0.112911	FALSE	none	NA
PMO000101	f_capperfiber	0.236516	-0.648511	FALSE	none	NA
PMO000102	f_capperfiber	0.650763	0.27791	FALSE	none	NA
PMO000103	f_capperfiber	0.0168245	-0.941525	TRUE	N	re
PMO000105	f_capperfiber	0.0644946	-0.855493	FALSE	none	NA
PMO000106	f_capperfiber	0.804447	-0.1542	FALSE	none	NA
PMO000107	f_capperfiber	0.404919	0.487431	FALSE	none	NA
PMO000108	f_capperfiber	0.58331	-0.333561	FALSE	none	NA
PMO000109	f_capperfiber	0.630607	-0.294432	FALSE	none	NA
PMO000111	f_capperfiber	0.501939	0.402309	FALSE	none	NA
PMO000112	f_capperfiber	0.35754	-0.530669	FALSE	none	NA
PMO000113	f_capperfiber	0.283235	-0.601495	FALSE	none	NA
PMO000114	f_capperfiber	0.518475	-0.38817	FALSE	none	NA
PMO000115	f_capperfiber	0.790958	-0.164932	FALSE	none	NA
PMO000116	f_capperfiber	0.32547	0.560729	FALSE	none	NA
PMO000117	f_capperfiber	0.1496	0.743732	FALSE	none	NA
PMO000122	f_capperfiber	0.729807	-0.21385	FALSE	none	NA
PMO000123	f_capperfiber	0.133699	0.762721	FALSE	none	NA
PMO000124	f_capperfiber	0.333142	0.553473	FALSE	none	NA
PMO000125	f_capperfiber	0.748357	0.19896	FALSE	none	NA
PMO000126	f_capperfiber	0.341767	-0.545365	FALSE	none	NA
PMO000127	f_capperfiber	0.588026	0.329635	FALSE	none	NA
PMO000128	f_capperfiber	0.604113	-0.316284	FALSE	none	NA
PMO000129	f_capperfiber	0.222662	0.662924	FALSE	none	NA
PMO000130	f_capperfiber	0.214474	-0.671557	FALSE	none	NA
PMO000133	f_capperfiber	0.947459	0.041277	FALSE	none	NA
PMO000135	f_capperfiber	0.756916	-0.192106	FALSE	none	NA
PMO000138	f_capperfiber	0.996566	-0.00269691	FALSE	none	NA
PMO000139	f_capperfiber	0.65647	-0.273248	FALSE	none	NA
PMO000140	f_capperfiber	0.171732	0.718256	FALSE	none	NA
PMO000141	f_capperfiber	0.940967	0.0463811	FALSE	none	NA
PMO000142	f_capperfiber	0.400235	0.49165	FALSE	none	NA
PMO000143	f_capperfiber	0.209341	-0.677017	FALSE	none	NA
PMO000144	f_capperfiber	0.315786	-0.569949	FALSE	none	NA
PMO000145	f_capperfiber	0.248048	-0.63669	FALSE	none	NA
PMO000146	f_capperfiber	0.116166	-0.784454	FALSE	none	NA
PMO000147	f_capperfiber	0.172579	-0.717301	FALSE	none	NA
PMO000148	f_capperfiber	0.125281	-0.773042	FALSE	none	NA
PMO000149	f_capperfiber	0.243684	-0.641146	FALSE	none	NA
PMO000150	f_capperfiber	0.274157	-0.610458	FALSE	none	NA
PMO000151	f_capperfiber	0.415448	-0.477988	FALSE	none	NA
PMO000152	f_capperfiber	0.325938	-0.560285	FALSE	none	NA
PMO000153	f_capperfiber	0.337547	-0.549326	FALSE	none	NA
PMO000154	f_capperfiber	0.236756	-0.648265	FALSE	none	NA
PMO000155	f_capperfiber	0.697724	0.239724	FALSE	none	NA
PMO000156	f_capperfiber	0.377332	-0.51245	FALSE	none	NA
PMO000157	f_capperfiber	0.312814	-0.572794	FALSE	none	NA
PMO000158	f_capperfiber	0.68436	-0.25055	FALSE	none	NA
PMO000159	f_capperfiber	0.691734	-0.244572	FALSE	none	NA
PMO000160	f_capperfiber	0.229294	-0.655995	FALSE	none	NA
PMO000163	f_capperfiber	0.963332	0.0288026	FALSE	none	NA
PMO000164	f_capperfiber	0.0273453	-0.918979	TRUE	N	re
PMO000166	f_capperfiber	0.593829	-0.324811	FALSE	none	NA
PMO000167	f_capperfiber	0.896651	-0.0812599	FALSE	none	NA
PMO000168	f_capperfiber	0.620358	-0.302866	FALSE	none	NA
PMO000170	f_capperfiber	0.297361	-0.587696	FALSE	none	NA
PMO000171	f_capperfiber	0.444012	-0.452643	FALSE	none	NA
PMO000172	f_capperfiber	0.389156	0.501675	FALSE	none	NA
PMO000173	f_capperfiber	0.778494	-0.174865	FALSE	none	NA
PMO000175	f_capperfiber	0.0440401	-0.888326	TRUE	N	re
PMO000176	f_capperfiber	0.341922	-0.545221	FALSE	none	NA
PMO000177	f_capperfiber	0.217014	-0.66887	FALSE	none	NA
PMO000178	f_capperfiber	0.859696	0.110419	FALSE	none	NA
PMO000179	f_capperfiber	0.444877	-0.451881	FALSE	none	NA
PMO000180	f_capperfiber	0.0670555	0.851632	FALSE	none	NA
PMO000181	f_capperfiber	0.546994	-0.363996	FALSE	none	NA
PMO000182	f_capperfiber	0.175695	-0.713798	FALSE	none	NA
PMO000183	f_capperfiber	0.564555	-0.349233	FALSE	none	NA
PMO000185	f_capperfiber	0.198216	-0.688979	FALSE	none	NA
PMO000186	f_capperfiber	0.523997	-0.383469	FALSE	none	NA
PMO000187	f_capperfiber	0.953567	-0.0364767	FALSE	none	NA
PMO000189	f_capperfiber	0.495065	-0.408214	FALSE	none	NA
PMO000190	f_capperfiber	0.0112576	0.955329	TRUE	P	re
PMO000191	f_capperfiber	0.892798	0.0842962	FALSE	none	NA
PMO000192	f_capperfiber	0.198674	-0.688484	FALSE	none	NA
PMO000194	f_capperfiber	0.115929	-0.784754	FALSE	none	NA
PMO000196	f_capperfiber	0.470052	0.429851	FALSE	none	NA
PMO000197	f_capperfiber	0.801696	0.156388	FALSE	none	NA
PMO000198	f_capperfiber	0.218718	-0.667071	FALSE	none	NA
PMO000199	f_capperfiber	0.229306	-0.655982	FALSE	none	NA
PMO000200	f_capperfiber	0.513343	0.392548	FALSE	none	NA
PMO000201	f_capperfiber	0.557649	0.355027	FALSE	none	NA
PMO000202	f_capperfiber	0.327691	-0.558624	FALSE	none	NA
PMO000203	f_capperfiber	0.959459	-0.031846	FALSE	none	NA
PMO000204	f_capperfiber	0.726926	0.216167	FALSE	none	NA
PMO000205	f_capperfiber	0.24179	-0.643086	FALSE	none	NA
PMO000206	f_capperfiber	0.270731	-0.613862	FALSE	none	NA
PMO000207	f_capperfiber	0.144798	-0.749401	FALSE	none	NA
PMO000209	f_capperfiber	0.362162	-0.526393	FALSE	none	NA
PMO000210	f_capperfiber	0.949126	0.0399667	FALSE	none	NA
PMO000211	f_capperfiber	0.330718	0.555761	FALSE	none	NA
PMO000212	f_capperfiber	0.781207	0.172702	FALSE	none	NA
PMO000213	f_capperfiber	0.412906	-0.480263	FALSE	none	NA
PMO000214	f_capperfiber	0.161752	-0.729619	FALSE	none	NA
PMO000217	f_capperfiber	0.193512	-0.694094	FALSE	none	NA
PMO000218	f_capperfiber	0.0828774	-0.828713	FALSE	none	NA
PMO000219	f_capperfiber	0.545697	0.36509	FALSE	none	NA
PMO000220	f_capperfiber	0.94307	-0.0447275	FALSE	none	NA
PMO000221	f_capperfiber	0.323612	-0.562493	FALSE	none	NA
PMO000222	f_capperfiber	0.677418	-0.256186	FALSE	none	NA
PMO000224	f_capperfiber	0.173267	-0.716526	FALSE	none	NA
PMO000225	f_capperfiber	0.431947	-0.463302	FALSE	none	NA
PMO000226	f_capperfiber	0.218299	-0.667513	FALSE	none	NA
PMO000228	f_capperfiber	0.123615	-0.775108	FALSE	none	NA
PMO000229	f_capperfiber	0.200276	-0.68675	FALSE	none	NA
PMO000230	f_capperfiber	0.55619	-0.356254	FALSE	none	NA
PMO000231	f_capperfiber	0.975492	-0.0192501	FALSE	none	NA
PMO000232	f_capperfiber	0.26578	-0.618799	FALSE	none	NA
PMO000233	f_capperfiber	0.248209	-0.636526	FALSE	none	NA
PMO000235	f_capperfiber	0.194799	-0.692692	FALSE	none	NA
PMO000238	f_capperfiber	0.711468	0.22862	FALSE	none	NA
PMO000239	f_capperfiber	0.490265	-0.412348	FALSE	none	NA
PMO000240	f_capperfiber	0.0321189	-0.909719	TRUE	N	re
PMO000241	f_capperfiber	0.172862	-0.716982	FALSE	none	NA
PMO000242	f_capperfiber	0.786787	0.168254	FALSE	none	NA
PMO000243	f_capperfiber	0.488652	-0.413739	FALSE	none	NA
PMO000245	f_capperfiber	0.684996	-0.250034	FALSE	none	NA
PMO000247	f_capperfiber	0.169221	-0.721097	FALSE	none	NA
PMO000250	f_capperfiber	0.560832	-0.352355	FALSE	none	NA
PMO000251	f_capperfiber	0.494047	-0.409091	FALSE	none	NA
PMO000252	f_capperfiber	0.0932591	-0.81441	FALSE	none	NA
PMO000253	f_capperfiber	0.549219	-0.36212	FALSE	none	NA
PMO000254	f_capperfiber	0.797463	-0.159754	FALSE	none	NA
PMO000255	f_capperfiber	0.0245368	-0.92467	TRUE	N	ri
PMO000257	f_capperfiber	0.0855955	-0.824917	FALSE	none	NA
PMO000259	f_capperfiber	0.682629	-0.251954	FALSE	none	NA
PMO000260	f_capperfiber	0.492901	-0.410076	FALSE	none	NA
PMO000261	f_capperfiber	0.0376446	-0.899535	TRUE	N	re
PMO000262	f_capperfiber	0.345066	0.542278	FALSE	none	NA
PMO000263	f_capperfiber	0.376944	-0.512805	FALSE	none	NA
PMO000264	f_capperfiber	0.228793	-0.656516	FALSE	none	NA
PMO000265	f_capperfiber	0.104518	-0.799437	FALSE	none	NA
PMO000266	f_capperfiber	0.0803361	-0.832296	FALSE	none	NA
PMO000268	f_capperfiber	0.700149	0.237762	FALSE	none	NA
PMO000270	f_capperfiber	0.183145	-0.705493	FALSE	none	NA
PMO000271	f_capperfiber	0.241894	-0.64298	FALSE	none	NA
PMO000272	f_capperfiber	0.715449	-0.225409	FALSE	none	NA
PMO000274	f_capperfiber	0.713993	-0.226583	FALSE	none	NA
PMO000275	f_capperfiber	0.229014	-0.656286	FALSE	none	NA
PMO000276	f_capperfiber	0.123786	-0.774896	FALSE	none	NA
PMO000277	f_capperfiber	0.920833	-0.0622174	FALSE	none	NA
PMO000278	f_capperfiber	0.656968	-0.272841	FALSE	none	NA
PMO000282	f_capperfiber	0.192122	-0.695612	FALSE	none	NA
PMO000283	f_capperfiber	0.453028	-0.444719	FALSE	none	NA
PMO000284	f_capperfiber	0.402225	-0.489856	FALSE	none	NA
PMO000285	f_capperfiber	0.252198	-0.632474	FALSE	none	NA
PMO000286	f_capperfiber	0.913071	0.068327	FALSE	none	NA
PMO000287	f_capperfiber	0.224916	-0.660562	FALSE	none	NA
PMO000288	f_capperfiber	0.33971	-0.547294	FALSE	none	NA
PMO000289	f_capperfiber	0.188261	-0.699846	FALSE	none	NA
PMO000290	f_capperfiber	0.0849189	-0.825859	FALSE	none	NA
PMO000291	f_capperfiber	0.604678	-0.315817	FALSE	none	NA
PMO000294	f_capperfiber	0.0640872	-0.856111	FALSE	none	NA
PMO000295	f_capperfiber	0.208434	-0.677986	FALSE	none	NA
PMO000297	f_capperfiber	0.293314	-0.591632	FALSE	none	NA
PMO000298	f_capperfiber	0.119892	-0.779758	FALSE	none	NA
PMO000299	f_capperfiber	0.165697	-0.725104	FALSE	none	NA
PMO000300	f_capperfiber	0.0731496	-0.842625	FALSE	none	NA
PMO000301	f_capperfiber	0.644397	-0.283119	FALSE	none	NA
PMO000302	f_capperfiber	0.151207	-0.741847	FALSE	none	NA
PMO000304	f_capperfiber	0.122831	-0.776085	FALSE	none	NA
PMO000305	f_capperfiber	0.129083	-0.768355	FALSE	none	NA
PMO000306	f_capperfiber	0.445463	-0.451365	FALSE	none	NA
PMO000307	f_capperfiber	0.32076	-0.565205	FALSE	none	NA
PMO000308	f_capperfiber	0.743561	-0.202806	FALSE	none	NA
PMO000309	f_capperfiber	0.2547	-0.62994	FALSE	none	NA
PMO000311	f_capperfiber	0.279437	-0.605235	FALSE	none	NA
PMO000313	f_capperfiber	0.399139	-0.492639	FALSE	none	NA
PMO000316	f_capperfiber	0.322805	-0.563259	FALSE	none	NA
PMO000317	f_capperfiber	0.00918927	0.961006	TRUE	P	re
PMO000318	f_capperfiber	0.427647	-0.467117	FALSE	none	NA
PMO000319	f_capperfiber	0.258815	-0.625787	FALSE	none	NA
PMO000320	f_capperfiber	0.515259	-0.390913	FALSE	none	NA
PMO000322	f_capperfiber	0.298512	-0.586579	FALSE	none	NA
PMO000323	f_capperfiber	0.332352	-0.554218	FALSE	none	NA
PMO000324	f_capperfiber	0.605943	-0.31477	FALSE	none	NA
PMO000325	f_capperfiber	0.0416839	-0.892391	TRUE	N	ri
PMO000326	f_capperfiber	0.804288	-0.154327	FALSE	none	NA
PMO000327	f_capperfiber	0.558446	0.354358	FALSE	none	NA
PMO000328	f_capperfiber	0.16198	0.729357	FALSE	none	NA
PMO000329	f_capperfiber	0.268219	0.616364	FALSE	none	NA
PMO000330	f_capperfiber	0.172843	-0.717003	FALSE	none	NA
PMO000331	f_capperfiber	0.701367	0.236778	FALSE	none	NA
PMO000334	f_capperfiber	0.377141	-0.512625	FALSE	none	NA
PMO000335	f_capperfiber	0.0531553	0.873206	FALSE	none	NA
PMO000336	f_capperfiber	0.111231	-0.790744	FALSE	none	NA
PMO000337	f_capperfiber	0.406523	-0.485989	FALSE	none	NA
PMO000338	f_capperfiber	0.681151	0.253154	FALSE	none	NA
PMO000340	f_capperfiber	0.258536	0.626069	FALSE	none	NA
PMO000341	f_capperfiber	0.173429	-0.716344	FALSE	none	NA
PMO000342	f_capperfiber	0.391042	-0.499964	FALSE	none	NA
PMO000344	f_capperfiber	0.49956	-0.40435	FALSE	none	NA
PMO000345	f_capperfiber	0.235745	0.649308	FALSE	none	NA
PMO000346	f_capperfiber	0.877275	-0.0965384	FALSE	none	NA
PMO000348	f_capperfiber	0.235416	-0.649648	FALSE	none	NA
PMO000349	f_capperfiber	0.192742	-0.694934	FALSE	none	NA
PMO000350	f_capperfiber	0.173673	-0.716069	FALSE	none	NA
PMO000352	f_capperfiber	0.358321	-0.529945	FALSE	none	NA
PMO000353	f_capperfiber	0.475847	-0.424817	FALSE	none	NA
PMO000355	f_capperfiber	0.959103	0.0321257	FALSE	none	NA
PMO000356	f_capperfiber	0.530209	-0.378192	FALSE	none	NA
PMO000358	f_capperfiber	0.251622	-0.633057	FALSE	none	NA
PMO000360	f_capperfiber	0.095906	-0.810843	FALSE	none	NA
PMO000361	f_capperfiber	0.122613	0.776355	FALSE	none	NA
PMO000362	f_capperfiber	0.259591	-0.625006	FALSE	none	NA
PMO000364	f_capperfiber	0.386764	0.503849	FALSE	none	NA
PMO000366	f_capperfiber	0.940964	-0.0463837	FALSE	none	NA
PMO000367	f_capperfiber	0.267718	-0.616864	FALSE	none	NA
PMO000368	f_capperfiber	0.294265	-0.590705	FALSE	none	NA
PMO000369	f_capperfiber	0.194024	-0.693536	FALSE	none	NA
PMO000370	f_capperfiber	0.124766	-0.77368	FALSE	none	NA
PMO000371	f_capperfiber	0.303679	0.58158	FALSE	none	NA
PMO000372	f_capperfiber	0.133298	-0.763208	FALSE	none	NA
PMO000373	f_capperfiber	0.310865	-0.574663	FALSE	none	NA
PMO000374	f_capperfiber	0.404714	-0.487616	FALSE	none	NA
PMO000375	f_capperfiber	0.798682	-0.158784	FALSE	none	NA
PMO000377	f_capperfiber	0.922624	-0.0608088	FALSE	none	NA
PMO000378	f_capperfiber	0.279696	-0.60498	FALSE	none	NA
PMO000379	f_capperfiber	0.0079584	-0.964583	TRUE	N	re
PMO000380	f_capperfiber	0.126159	-0.771955	FALSE	none	NA
PMO000381	f_capperfiber	0.221541	-0.664101	FALSE	none	NA
PMO000382	f_capperfiber	0.430111	-0.46493	FALSE	none	NA
PMO000383	f_capperfiber	0.129913	-0.767338	FALSE	none	NA
PMO000384	f_capperfiber	0.665364	-0.265993	FALSE	none	NA
PMO000385	f_capperfiber	0.528794	0.379393	FALSE	none	NA
PMO000386	f_capperfiber	0.431484	-0.463713	FALSE	none	NA
PMO000387	f_capperfiber	0.340833	-0.546241	FALSE	none	NA
PMO000388	f_capperfiber	0.361092	-0.527382	FALSE	none	NA
PMO000391	f_capperfiber	0.260474	-0.624119	FALSE	none	NA
PMO000392	f_capperfiber	0.285991	-0.598789	FALSE	none	NA
PMO000393	f_capperfiber	0.00755418	-0.965797	TRUE	N	re
PMO000394	f_capperfiber	0.231958	-0.653227	FALSE	none	NA
PMO000395	f_capperfiber	0.423304	-0.470979	FALSE	none	NA
PMO000396	f_capperfiber	0.412229	-0.480869	FALSE	none	NA
PMO000397	f_capperfiber	0.192279	-0.695441	FALSE	none	NA
PMO000399	f_capperfiber	0.896223	-0.0815973	FALSE	none	NA
PMO000401	f_capperfiber	0.263041	-0.621541	FALSE	none	NA
PMO000404	f_capperfiber	0.560492	-0.352641	FALSE	none	NA
PMO000405	f_capperfiber	0.576273	0.33943	FALSE	none	NA
PMO000407	f_capperfiber	0.511828	-0.393842	FALSE	none	NA
PMO000408	f_capperfiber	0.158714	-0.733117	FALSE	none	NA
PMO000410	f_capperfiber	0.20691	-0.679616	FALSE	none	NA
PMO000411	f_capperfiber	0.763945	-0.186483	FALSE	none	NA
PMO000412	f_capperfiber	0.461815	-0.43703	FALSE	none	NA
PMO000413	f_capperfiber	0.538672	-0.371023	FALSE	none	NA
PMO000414	f_capperfiber	0.301934	-0.583266	FALSE	none	NA
PMO000415	f_capperfiber	0.495647	-0.407713	FALSE	none	NA
PMO000416	f_capperfiber	0.146304	-0.747617	FALSE	none	NA
PMO000417	f_capperfiber	0.715931	-0.225021	FALSE	none	NA
PMO000420	f_capperfiber	0.406639	-0.485884	FALSE	none	NA
PMO000421	f_capperfiber	0.267828	-0.616754	FALSE	none	NA
PMO000423	f_capperfiber	0.486539	-0.415563	FALSE	none	NA
PMO000426	f_capperfiber	0.859381	0.110668	FALSE	none	NA
PMO000428	f_capperfiber	0.193865	-0.693709	FALSE	none	NA
PMO000430	f_capperfiber	0.301825	-0.583372	FALSE	none	NA
PMO000432	f_capperfiber	0.179697	-0.709324	FALSE	none	NA
PMO000433	f_capperfiber	0.0783228	-0.83516	FALSE	none	NA
PMO000434	f_capperfiber	0.0940169	-0.813385	FALSE	none	NA
PMO000435	f_capperfiber	0.30951	-0.575964	FALSE	none	NA
PMO000436	f_capperfiber	0.663201	0.267756	FALSE	none	NA
PMO000437	f_capperfiber	0.76778	-0.183419	FALSE	none	NA
PMO000438	f_capperfiber	0.284129	-0.600617	FALSE	none	NA
PMO000439	f_capperfiber	0.285222	-0.599543	FALSE	none	NA
PMO000440	f_capperfiber	0.589062	-0.328772	FALSE	none	NA
PMO000441	f_capperfiber	0.397324	-0.494277	FALSE	none	NA
PMO000442	f_capperfiber	0.232722	-0.652435	FALSE	none	NA
PMO000443	f_capperfiber	0.544711	0.365921	FALSE	none	NA
PMO000444	f_capperfiber	0.540019	-0.369885	FALSE	none	NA
PMO000445	f_capperfiber	0.12536	-0.772944	FALSE	none	NA
PMO000446	f_capperfiber	0.247705	-0.63704	FALSE	none	NA
PMO000447	f_capperfiber	0.278184	-0.606473	FALSE	none	NA
PMO000449	f_capperfiber	0.333081	-0.55353	FALSE	none	NA
PMO000452	f_capperfiber	0.254012	-0.630636	FALSE	none	NA
PMO000453	f_capperfiber	0.40654	-0.485973	FALSE	none	NA
PMO000454	f_capperfiber	0.438505	-0.4575	FALSE	none	NA
PMO000455	f_capperfiber	0.310673	-0.574847	FALSE	none	NA
PMO000456	f_capperfiber	0.387967	-0.502755	FALSE	none	NA
PMO000458	f_capperfiber	0.121905	-0.777238	FALSE	none	NA
PMO000459	f_capperfiber	0.341646	-0.545479	FALSE	none	NA
PMO000460	f_capperfiber	0.482889	-0.418717	FALSE	none	NA
PMO000462	f_capperfiber	0.466148	-0.43325	FALSE	none	NA
PMO000463	f_capperfiber	0.459521	-0.439034	FALSE	none	NA
PMO000464	f_capperfiber	0.13108	-0.76591	FALSE	none	NA
PMO000465	f_capperfiber	0.304596	-0.580695	FALSE	none	NA
PMO000467	f_capperfiber	0.604649	-0.315841	FALSE	none	NA
PMO000468	f_capperfiber	0.133386	-0.763101	FALSE	none	NA
PMO000469	f_capperfiber	0.322787	-0.563277	FALSE	none	NA
PMO000473	f_capperfiber	0.49488	0.408373	FALSE	none	NA
PMO000474	f_capperfiber	0.641835	-0.285218	FALSE	none	NA
PMO000475	f_capperfiber	0.585378	-0.331838	FALSE	none	NA
PMO000476	f_capperfiber	0.259689	-0.624907	FALSE	none	NA
PMO000477	f_capperfiber	0.653267	0.275864	FALSE	none	NA
PMO000478	f_capperfiber	0.445489	-0.451342	FALSE	none	NA
PMO000479	f_capperfiber	0.460571	-0.438116	FALSE	none	NA
PMO000480	f_capperfiber	0.343914	-0.543355	FALSE	none	NA
PMO000482	f_capperfiber	0.433763	-0.461693	FALSE	none	NA
PMO000483	f_capperfiber	0.416128	-0.47738	FALSE	none	NA
PMO000484	f_capperfiber	0.172553	-0.71733	FALSE	none	NA
PMO000485	f_capperfiber	0.218552	-0.667247	FALSE	none	NA
PMO000486	f_capperfiber	0.804715	-0.153987	FALSE	none	NA
PMO000489	f_capperfiber	0.212888	-0.673241	FALSE	none	NA
PMO000490	f_capperfiber	0.212888	-0.673241	FALSE	none	NA
PMO000492	f_capperfiber	0.173356	-0.716425	FALSE	none	NA
PMO000493	f_capperfiber	0.90042	0.0782897	FALSE	none	NA
PMO000494	f_capperfiber	0.647774	-0.280355	FALSE	none	NA
PMO000495	f_capperfiber	0.282019	-0.602691	FALSE	none	NA
PMO000496	f_capperfiber	0.703533	-0.235027	FALSE	none	NA
PMO000497	f_capperfiber	0.182624	-0.706071	FALSE	none	NA
PMO000498	f_capperfiber	0.303016	-0.58222	FALSE	none	NA
PMO000499	f_capperfiber	0.248265	-0.63647	FALSE	none	NA
PMO000501	f_capperfiber	0.636599	-0.289511	FALSE	none	NA
PMO000502	f_capperfiber	0.410127	-0.482754	FALSE	none	NA
PMO000504	f_capperfiber	0.298463	-0.586627	FALSE	none	NA
PMO000505	f_capperfiber	0.363239	-0.525398	FALSE	none	NA
PMO000507	f_capperfiber	0.19423	0.693312	FALSE	none	NA
PMO000508	f_capperfiber	0.323471	-0.562627	FALSE	none	NA
PMO000509	f_capperfiber	0.321586	-0.564418	FALSE	none	NA
PMO000511	f_capperfiber	0.522734	-0.384544	FALSE	none	NA
PMO000512	f_capperfiber	0.00498201	0.974107	TRUE	P	ri
PMO000513	f_capperfiber	0.554994	-0.357259	FALSE	none	NA
PMO000517	f_capperfiber	0.095327	-0.81162	FALSE	none	NA
PMO000518	f_capperfiber	0.30715	-0.578234	FALSE	none	NA
PMO000519	f_capperfiber	0.267735	-0.616847	FALSE	none	NA
PMO000520	f_capperfiber	0.0994132	-0.806162	FALSE	none	NA
PMO000521	f_capperfiber	0.39127	-0.499758	FALSE	none	NA
PMO000522	f_capperfiber	0.179025	-0.710073	FALSE	none	NA
PMO000524	f_capperfiber	0.608632	-0.312546	FALSE	none	NA
PMO000525	f_capperfiber	0.381275	-0.508848	FALSE	none	NA
PMO000527	f_capperfiber	0.145095	-0.74905	FALSE	none	NA
PMO000528	f_capperfiber	0.291639	-0.593265	FALSE	none	NA
PMO000530	f_capperfiber	0.452231	-0.445418	FALSE	none	NA
PMO000531	f_capperfiber	0.364455	-0.524276	FALSE	none	NA
PMO000532	f_capperfiber	0.356945	-0.531221	FALSE	none	NA
PMO000533	f_capperfiber	0.27575	-0.60888	FALSE	none	NA
PMO000534	f_capperfiber	0.308225	-0.577199	FALSE	none	NA
PMO000535	f_capperfiber	0.336464	-0.550345	FALSE	none	NA
PMO000536	f_capperfiber	0.33825	-0.548665	FALSE	none	NA
PMO000537	f_capperfiber	0.936405	-0.0499679	FALSE	none	NA
PMO000538	f_capperfiber	0.248355	-0.636378	FALSE	none	NA
PMO000541	f_capperfiber	0.245007	-0.639794	FALSE	none	NA
PMO000542	f_capperfiber	0.330871	0.555617	FALSE	none	NA
PMO000544	f_capperfiber	0.502751	-0.401612	FALSE	none	NA
PMO000546	f_capperfiber	0.0498039	0.878662	TRUE	P	ri
PMO000549	f_capperfiber	0.507796	0.39729	FALSE	none	NA
PMO000551	f_capperfiber	0.300832	-0.584332	FALSE	none	NA
PMO000552	f_capperfiber	0.329939	-0.556497	FALSE	none	NA
PMO000553	f_capperfiber	0.40733	-0.485263	FALSE	none	NA
PMO000555	f_capperfiber	0.785632	0.169175	FALSE	none	NA
PMO000557	f_capperfiber	0.448467	-0.448722	FALSE	none	NA
PMO000558	f_capperfiber	0.244642	-0.640167	FALSE	none	NA
PMO000560	f_capperfiber	0.447939	-0.449186	FALSE	none	NA
PMO000561	f_capperfiber	0.32762	-0.558692	FALSE	none	NA
PMO000563	f_capperfiber	0.323291	-0.562797	FALSE	none	NA
PMO000564	f_capperfiber	0.117112	-0.783257	FALSE	none	NA
PMO000565	f_capperfiber	0.152262	-0.740613	FALSE	none	NA
PMO000566	f_capperfiber	0.388716	-0.502075	FALSE	none	NA
PMO000567	f_capperfiber	0.403787	-0.488449	FALSE	none	NA
PMO000569	f_capperfiber	0.299786	-0.585344	FALSE	none	NA
PMO000570	f_capperfiber	0.201867	-0.685033	FALSE	none	NA
PMO000572	f_capperfiber	0.640631	0.286205	FALSE	none	NA
PMO000574	f_capperfiber	0.30819	-0.577232	FALSE	none	NA
PMO000575	f_capperfiber	0.58629	-0.331079	FALSE	none	NA
PMO000576	f_capperfiber	0.272756	-0.611849	FALSE	none	NA
PMO000577	f_capperfiber	0.19733	-0.68994	FALSE	none	NA
PMO000578	f_capperfiber	0.294355	-0.590618	FALSE	none	NA
PMO000579	f_capperfiber	0.309584	-0.575893	FALSE	none	NA
PMO000580	f_capperfiber	0.086753	-0.823312	FALSE	none	NA
PMO000581	f_capperfiber	0.35955	-0.528808	FALSE	none	NA
PMO000582	f_capperfiber	0.251693	-0.632986	FALSE	none	NA
PMO000583	f_capperfiber	0.470338	-0.429602	FALSE	none	NA
PMO000584	f_capperfiber	0.317322	-0.568483	FALSE	none	NA
PMO000585	f_capperfiber	0.352779	-0.535088	FALSE	none	NA
PMO000586	f_capperfiber	0.19703	-0.690265	FALSE	none	NA
PMO000587	f_capperfiber	0.306349	-0.579005	FALSE	none	NA
PMO000588	f_capperfiber	0.106322	-0.797085	FALSE	none	NA
PMO000589	f_capperfiber	0.222056	-0.66356	FALSE	none	NA
PMO000591	f_capperfiber	0.572124	-0.342896	FALSE	none	NA
PMO000592	f_capperfiber	0.0492975	-0.879496	TRUE	N	re
PMO000593	f_capperfiber	0.247634	-0.637112	FALSE	none	NA
PMO000595	f_capperfiber	0.507353	0.397669	FALSE	none	NA
PMO000596	f_capperfiber	0.214796	-0.671216	FALSE	none	NA
PMO000598	f_capperfiber	0.153992	0.738594	FALSE	none	NA
PMO000599	f_capperfiber	0.446639	-0.45033	FALSE	none	NA
PMO000600	f_capperfiber	0.0217999	0.930422	TRUE	P	ri
PMO000601	f_capperfiber	0.582782	-0.334001	FALSE	none	NA
PMO000602	f_capperfiber	0.634237	-0.29145	FALSE	none	NA
PMO000603	f_capperfiber	0.635924	0.290065	FALSE	none	NA
PMO000604	f_capperfiber	0.651389	-0.277399	FALSE	none	NA
PMO000605	f_capperfiber	0.852262	-0.116296	FALSE	none	NA
PMO000607	f_capperfiber	0.234127	-0.650981	FALSE	none	NA
PMO000608	f_capperfiber	0.29377	-0.591187	FALSE	none	NA
PMO000609	f_capperfiber	0.393381	0.497845	FALSE	none	NA
PMO000610	f_capperfiber	0.352963	-0.534917	FALSE	none	NA
PMO000612	f_capperfiber	0.336037	-0.550746	FALSE	none	NA
PMO000613	f_capperfiber	0.0710279	-0.845733	FALSE	none	NA
PMO000614	f_capperfiber	0.573841	-0.341461	FALSE	none	NA
PMO000615	f_capperfiber	0.265134	0.619445	FALSE	none	NA
PMO000616	f_capperfiber	0.917731	-0.0646587	FALSE	none	NA
PMO000617	f_capperfiber	0.522514	-0.38473	FALSE	none	NA
PMO000618	f_capperfiber	0.526051	-0.381723	FALSE	none	NA
PMO000620	f_capperfiber	0.465678	-0.43366	FALSE	none	NA
PMO000621	f_capperfiber	0.0485412	-0.880747	TRUE	N	re
PMO000622	f_capperfiber	0.383356	-0.50695	FALSE	none	NA
PMO000623	f_capperfiber	0.203534	-0.683238	FALSE	none	NA
PMO000624	f_capperfiber	0.450588	-0.446859	FALSE	none	NA
PMO000626	f_capperfiber	0.0865794	0.823553	FALSE	none	NA
PMO000628	f_capperfiber	0.365437	-0.523371	FALSE	none	NA
PMO000631	f_capperfiber	0.143665	-0.750746	FALSE	none	NA
PMO000632	f_capperfiber	0.456541	-0.441641	FALSE	none	NA
PMO000633	f_capperfiber	0.169307	-0.721	FALSE	none	NA
PMO000634	f_capperfiber	0.241629	-0.643251	FALSE	none	NA
PMO000635	f_capperfiber	0.282861	-0.601863	FALSE	none	NA
PMO000637	f_capperfiber	0.16611	-0.724632	FALSE	none	NA
PMO000639	f_capperfiber	0.717201	0.223998	FALSE	none	NA
PMO000640	f_capperfiber	0.77984	0.173792	FALSE	none	NA
PMO000641	f_capperfiber	0.173078	-0.716738	FALSE	none	NA
PMO000643	f_capperfiber	0.0642465	-0.855869	FALSE	none	NA
PMO000644	f_capperfiber	0.27403	-0.610584	FALSE	none	NA
PMO000646	f_capperfiber	0.790177	-0.165554	FALSE	none	NA
PMO000647	f_capperfiber	0.489689	-0.412844	FALSE	none	NA
PMO000648	f_capperfiber	0.360612	-0.527825	FALSE	none	NA
PMO000649	f_capperfiber	0.260488	0.624104	FALSE	none	NA
PMO000650	f_capperfiber	0.377811	-0.512012	FALSE	none	NA
PMO000653	f_capperfiber	0.493307	0.409727	FALSE	none	NA
PMO000655	f_capperfiber	0.227836	-0.657513	FALSE	none	NA
PMO000656	f_capperfiber	0.148393	-0.745152	FALSE	none	NA
PMO000657	f_capperfiber	0.802353	-0.155865	FALSE	none	NA
PMO000659	f_capperfiber	0.027725	0.918224	TRUE	P	ri
PMO000660	f_capperfiber	0.849053	0.118834	FALSE	none	NA
PMO000661	f_capperfiber	0.528453	-0.379682	FALSE	none	NA
PMO000662	f_capperfiber	0.471152	-0.428894	FALSE	none	NA
PMO000663	f_capperfiber	0.235817	-0.649233	FALSE	none	NA
PMO000664	f_capperfiber	0.27587	-0.608761	FALSE	none	NA
PMO000668	f_capperfiber	0.857797	-0.11192	FALSE	none	NA
PMO000669	f_capperfiber	0.810026	-0.149767	FALSE	none	NA
PMO000670	f_capperfiber	0.286409	-0.598379	FALSE	none	NA
PMO000671	f_capperfiber	0.504329	-0.400259	FALSE	none	NA
PMO000672	f_capperfiber	0.158206	0.733704	FALSE	none	NA
PMO000673	f_capperfiber	0.17759	-0.711676	FALSE	none	NA
PMO000674	f_capperfiber	0.151565	-0.741428	FALSE	none	NA
PMO000675	f_capperfiber	0.156764	-0.735373	FALSE	none	NA
PMO000676	f_capperfiber	0.839768	0.126182	FALSE	none	NA
PMO000677	f_capperfiber	0.940292	0.0469121	FALSE	none	NA
PMO000678	f_capperfiber	0.172362	-0.717545	FALSE	none	NA
PMO000679	f_capperfiber	0.414073	-0.479218	FALSE	none	NA
PMO000680	f_capperfiber	0.703968	0.234675	FALSE	none	NA
PMO000681	f_capperfiber	0.36492	-0.523848	FALSE	none	NA
PMO000682	f_capperfiber	0.221513	-0.66413	FALSE	none	NA
PMO000683	f_capperfiber	0.975543	-0.0192095	FALSE	none	NA
PMO000684	f_capperfiber	0.4539	-0.443955	FALSE	none	NA
PMO000685	f_capperfiber	0.421885	-0.472243	FALSE	none	NA
PMO000686	f_capperfiber	0.933299	0.0524112	FALSE	none	NA
PMO000687	f_capperfiber	0.141426	-0.753415	FALSE	none	NA
PMO000688	f_capperfiber	0.712554	-0.227744	FALSE	none	NA
PMO000689	f_capperfiber	0.145661	0.748378	FALSE	none	NA
PMO000690	f_capperfiber	0.125828	0.772365	FALSE	none	NA
PMO000691	f_capperfiber	0.822547	0.139828	FALSE	none	NA
PMO000692	f_capperfiber	0.0772827	-0.836648	FALSE	none	NA
PMO000693	f_capperfiber	0.49367	-0.409415	FALSE	none	NA
PMO000695	f_capperfiber	0.599041	-0.320487	FALSE	none	NA
PMO000696	f_capperfiber	0.405717	-0.486714	FALSE	none	NA
PMO000699	f_capperfiber	0.706692	-0.232475	FALSE	none	NA
PMO000700	f_capperfiber	0.410464	-0.482451	FALSE	none	NA
PMO000701	f_capperfiber	0.369396	-0.519727	FALSE	none	NA
PMO000702	f_capperfiber	0.182935	0.705725	FALSE	none	NA
PMO000703	f_capperfiber	0.307716	-0.577689	FALSE	none	NA
PMO000704	f_capperfiber	0.839479	-0.12641	FALSE	none	NA
PMO000705	f_capperfiber	0.412049	-0.48103	FALSE	none	NA
PMO000706	f_capperfiber	0.944291	0.0437676	FALSE	none	NA
PMO000707	f_capperfiber	0.390873	0.500117	FALSE	none	NA
PMO000710	f_capperfiber	0.15131	-0.741727	FALSE	none	NA
PMO000711	f_capperfiber	0.38206	-0.508132	FALSE	none	NA
PMO000712	f_capperfiber	0.589594	-0.32833	FALSE	none	NA
PMO000714	f_capperfiber	0.899806	-0.0787734	FALSE	none	NA
PMO000715	f_capperfiber	0.216962	-0.668925	FALSE	none	NA
PMO000717	f_capperfiber	0.672447	0.260227	FALSE	none	NA
PMO000718	f_capperfiber	0.171341	-0.718698	FALSE	none	NA
PMO000719	f_capperfiber	0.540115	-0.369804	FALSE	none	NA
PMO000720	f_capperfiber	0.810411	-0.149461	FALSE	none	NA
PMO000721	f_capperfiber	0.306133	-0.579214	FALSE	none	NA
PMO000722	f_capperfiber	0.66779	0.264017	FALSE	none	NA
PMO000723	f_capperfiber	0.08448	-0.82647	FALSE	none	NA
PMO000724	f_capperfiber	0.573625	-0.341642	FALSE	none	NA
PMO000727	f_capperfiber	0.248401	-0.636331	FALSE	none	NA
PMO000729	f_capperfiber	0.293801	-0.591158	FALSE	none	NA
PMO000730	f_capperfiber	0.56654	0.347569	FALSE	none	NA
PMO000732	f_capperfiber	0.695688	0.241371	FALSE	none	NA
PMO000735	f_capperfiber	0.856331	0.113079	FALSE	none	NA
PMO000736	f_capperfiber	0.354431	-0.533553	FALSE	none	NA
PMO000737	f_capperfiber	0.37347	-0.515987	FALSE	none	NA
PMO000739	f_capperfiber	0.328953	-0.55743	FALSE	none	NA
PMO000740	f_capperfiber	0.166386	0.724318	FALSE	none	NA
PMO000741	f_capperfiber	0.146179	-0.747766	FALSE	none	NA
PMO000743	f_capperfiber	0.0824459	0.829319	FALSE	none	NA
PMO000744	f_capperfiber	0.541115	-0.368958	FALSE	none	NA
PMO000745	f_capperfiber	0.315779	-0.569956	FALSE	none	NA
PMO000747	f_capperfiber	0.738864	-0.206575	FALSE	none	NA
PMO000748	f_capperfiber	0.85227	-0.116289	FALSE	none	NA
PMO000749	f_capperfiber	0.442713	-0.453787	FALSE	none	NA
PMO000750	f_capperfiber	0.155822	-0.736465	FALSE	none	NA
PMO000751	f_capperfiber	0.298651	-0.586444	FALSE	none	NA
PMO000752	f_capperfiber	0.456055	-0.442066	FALSE	none	NA
PMO000753	f_capperfiber	0.414253	0.479057	FALSE	none	NA
PMO000756	f_capperfiber	0.64303	-0.284239	FALSE	none	NA
PMO000757	f_capperfiber	0.341882	-0.545258	FALSE	none	NA
PMO000758	f_capperfiber	0.703221	0.235279	FALSE	none	NA
PMO000759	f_capperfiber	0.292312	-0.592608	FALSE	none	NA
PMO000761	f_capperfiber	0.279686	-0.60499	FALSE	none	NA
PMO000762	f_capperfiber	0.344371	-0.542928	FALSE	none	NA
PMO000763	f_capperfiber	0.535611	-0.373614	FALSE	none	NA
PMO000764	f_capperfiber	0.309448	-0.576023	FALSE	none	NA
PMO000765	f_capperfiber	0.321973	-0.56405	FALSE	none	NA
PMO000767	f_capperfiber	0.227446	-0.65792	FALSE	none	NA
PMO000768	f_capperfiber	0.530092	-0.378292	FALSE	none	NA
PMO000769	f_capperfiber	0.764887	0.185731	FALSE	none	NA
PMO000770	f_capperfiber	0.240018	-0.644906	FALSE	none	NA
PMO000771	f_capperfiber	0.205706	-0.680905	FALSE	none	NA
PMO000772	f_capperfiber	0.238357	-0.646614	FALSE	none	NA
PMO000776	f_capperfiber	0.567922	-0.346412	FALSE	none	NA
PMO000779	f_capperfiber	0.3157	-0.570032	FALSE	none	NA
PMO000780	f_capperfiber	0.162597	-0.728649	FALSE	none	NA
PMO000782	f_capperfiber	0.337666	-0.549214	FALSE	none	NA
PMO000784	f_capperfiber	0.675119	-0.258055	FALSE	none	NA
PMO000785	f_capperfiber	0.726271	-0.216694	FALSE	none	NA
PMO000786	f_capperfiber	0.107204	-0.79594	FALSE	none	NA
PMO000787	f_capperfiber	0.383093	-0.50719	FALSE	none	NA
PMO000789	f_capperfiber	0.0759173	-0.838611	FALSE	none	NA
PMO000790	f_capperfiber	0.37618	-0.513504	FALSE	none	NA
PMO000793	f_capperfiber	0.516188	-0.39012	FALSE	none	NA
PMO000794	f_capperfiber	0.634864	-0.290935	FALSE	none	NA
PMO000795	f_capperfiber	0.0954309	0.811481	FALSE	none	NA
PMO000796	f_capperfiber	0.191066	-0.696767	FALSE	none	NA
PMO000797	f_capperfiber	0.344737	0.542586	FALSE	none	NA
PMO000799	f_capperfiber	0.521062	0.385966	FALSE	none	NA
PMO000800	f_capperfiber	0.697362	0.240016	FALSE	none	NA
PMO000801	f_capperfiber	0.670844	0.261531	FALSE	none	NA
PMO000804	f_capperfiber	0.25567	-0.628959	FALSE	none	NA
PMO000805	f_capperfiber	0.0144201	-0.947269	TRUE	N	re
PMO000806	f_capperfiber	0.390043	-0.50087	FALSE	none	NA
PMO000807	f_capperfiber	0.829742	0.134123	FALSE	none	NA
PMO000808	f_capperfiber	0.323182	-0.562901	FALSE	none	NA
PMO000809	f_capperfiber	0.574537	-0.34088	FALSE	none	NA
PMO000810	f_capperfiber	0.477069	-0.423757	FALSE	none	NA
PMO000812	f_capperfiber	0.449058	-0.448204	FALSE	none	NA
PMO000813	f_capperfiber	0.121101	-0.778243	FALSE	none	NA
PMO000814	f_capperfiber	0.0858266	-0.824596	FALSE	none	NA
PMO000815	f_capperfiber	0.160715	-0.730811	FALSE	none	NA
PMO000816	f_capperfiber	0.527362	-0.380609	FALSE	none	NA
PMO000817	f_capperfiber	0.591317	0.326898	FALSE	none	NA
PMO000818	f_capperfiber	0.970647	0.0230557	FALSE	none	NA
PMO000819	f_capperfiber	0.91586	-0.0661316	FALSE	none	NA
PMO000822	f_capperfiber	0.327224	-0.559067	FALSE	none	NA
PMO000823	f_capperfiber	0.974202	-0.0202634	FALSE	none	NA
PMO000824	f_capperfiber	0.563348	-0.350244	FALSE	none	NA
PMO000825	f_capperfiber	0.344909	0.542425	FALSE	none	NA
PMO000826	f_capperfiber	0.701785	0.236439	FALSE	none	NA
PMO000827	f_capperfiber	0.786911	0.168155	FALSE	none	NA
PMO000828	f_capperfiber	0.299497	0.585625	FALSE	none	NA
PMO000829	f_capperfiber	0.596053	-0.322965	FALSE	none	NA
PMO000830	f_capperfiber	0.246354	-0.638418	FALSE	none	NA
PMO000835	f_capperfiber	0.210751	-0.675514	FALSE	none	NA
PMO000836	f_capperfiber	0.553479	-0.358534	FALSE	none	NA
PMO000838	f_capperfiber	0.0950509	-0.811992	FALSE	none	NA
PMO000839	f_capperfiber	0.910213	-0.0705769	FALSE	none	NA
PMO000840	f_capperfiber	0.599427	-0.320166	FALSE	none	NA
PMO000841	f_capperfiber	0.218383	-0.667425	FALSE	none	NA
PMO000842	f_capperfiber	0.414896	-0.478482	FALSE	none	NA
PMO000843	f_capperfiber	0.167571	-0.72297	FALSE	none	NA
PMO000844	f_capperfiber	0.984275	0.012351	FALSE	none	NA
PMO000845	f_capperfiber	0.167661	-0.722868	FALSE	none	NA
PMO000846	f_capperfiber	0.117373	-0.782928	FALSE	none	NA
PMO000847	f_capperfiber	0.325506	-0.560695	FALSE	none	NA
PMO000849	f_capperfiber	0.0499905	-0.878355	TRUE	N	re
PMO000850	f_capperfiber	0.541649	0.368507	FALSE	none	NA
PMO000851	f_capperfiber	0.109804	-0.792578	FALSE	none	NA
PMO000852	f_capperfiber	0.754117	0.194347	FALSE	none	NA
PMO000853	f_capperfiber	0.552879	-0.359038	FALSE	none	NA
PMO000855	f_capperfiber	0.182562	-0.706139	FALSE	none	NA
PMO000856	f_capperfiber	0.607633	-0.313372	FALSE	none	NA
PMO000857	f_capperfiber	0.0352618	-0.903863	TRUE	N	re
PMO000858	f_capperfiber	0.0990172	-0.806688	FALSE	none	NA
PMO000859	f_capperfiber	0.335082	-0.551645	FALSE	none	NA
PMO000861	f_capperfiber	0.0619617	-0.859358	FALSE	none	NA
PMO000862	f_capperfiber	0.557956	-0.354769	FALSE	none	NA
PMO000863	f_capperfiber	0.324345	-0.561797	FALSE	none	NA
PMO000864	f_capperfiber	0.316138	-0.569614	FALSE	none	NA
PMO000865	f_capperfiber	0.677827	0.255853	FALSE	none	NA
PMO000866	f_capperfiber	0.824677	0.138139	FALSE	none	NA
PMO000867	f_capperfiber	0.523948	-0.383511	FALSE	none	NA
PMO000869	f_capperfiber	0.310262	-0.575242	FALSE	none	NA
PMO000870	f_capperfiber	0.409943	-0.482918	FALSE	none	NA
PMO000872	f_capperfiber	0.161942	-0.7294	FALSE	none	NA
PMO000873	f_capperfiber	0.0186297	-0.937387	TRUE	N	re
PMO000875	f_capperfiber	0.88414	-0.0911228	FALSE	none	NA
PMO000877	f_capperfiber	0.487505	-0.414729	FALSE	none	NA
PMO000878	f_capperfiber	0.641387	-0.285585	FALSE	none	NA
PMO000879	f_capperfiber	0.179314	0.709751	FALSE	none	NA
PMO000880	f_capperfiber	0.237172	-0.647835	FALSE	none	NA
PMO000881	f_capperfiber	0.263549	-0.621032	FALSE	none	NA
PMO000882	f_capperfiber	0.492441	0.410473	FALSE	none	NA
PMO000883	f_capperfiber	0.112554	-0.78905	FALSE	none	NA
PMO000884	f_capperfiber	0.648405	-0.279838	FALSE	none	NA
PMO000885	f_capperfiber	0.226602	-0.658801	FALSE	none	NA
PMO000889	f_capperfiber	0.95574	-0.0347684	FALSE	none	NA
PMO000891	f_capperfiber	0.573807	-0.341489	FALSE	none	NA
PMO000894	f_capperfiber	0.555052	0.35721	FALSE	none	NA
PMO000895	f_capperfiber	0.860681	0.109641	FALSE	none	NA
PMO000896	f_capperfiber	0.232614	-0.652547	FALSE	none	NA
PMO000898	f_capperfiber	0.305396	0.579923	FALSE	none	NA
PMO000899	f_capperfiber	0.0401021	0.895161	TRUE	P	ri
PMO000901	f_capperfiber	0.279489	-0.605184	FALSE	none	NA
PMO000902	f_capperfiber	0.209754	-0.676577	FALSE	none	NA
PMO000906	f_capperfiber	0.193762	-0.693822	FALSE	none	NA
PMO000907	f_capperfiber	0.0779179	-0.835738	FALSE	none	NA
PMO000911	f_capperfiber	0.18133	-0.707507	FALSE	none	NA
PMO000912	f_capperfiber	0.069326	-0.848247	FALSE	none	NA
PMO000913	f_capperfiber	0.336979	-0.54986	FALSE	none	NA
PMO000914	f_capperfiber	0.313766	-0.571882	FALSE	none	NA
PMO000915	f_capperfiber	0.10532	-0.79839	FALSE	none	NA
PMO000916	f_capperfiber	0.881108	-0.0935139	FALSE	none	NA
PMO000921	f_capperfiber	0.896477	-0.0813964	FALSE	none	NA
PMO000922	f_capperfiber	0.358735	-0.529562	FALSE	none	NA
PMO000923	f_capperfiber	0.437798	-0.458124	FALSE	none	NA
PMO000924	f_capperfiber	0.900742	-0.0780364	FALSE	none	NA
PMO000925	f_capperfiber	0.301476	-0.583709	FALSE	none	NA
PMO000926	f_capperfiber	0.0117187	-0.954111	TRUE	N	re
PMO000927	f_capperfiber	0.6041	-0.316295	FALSE	none	NA
PMO000928	f_capperfiber	0.10856	0.794184	FALSE	none	NA
PMO000929	f_capperfiber	0.246852	-0.637909	FALSE	none	NA
PMO000930	f_capperfiber	0.473733	-0.426652	FALSE	none	NA
PMO000932	f_capperfiber	0.0224702	0.928993	TRUE	P	re
PMO000933	f_capperfiber	0.281327	-0.603372	FALSE	none	NA
PMO000934	f_capperfiber	0.422604	-0.471603	FALSE	none	NA
PMO000935	f_capperfiber	0.132408	-0.764291	FALSE	none	NA
PMO000936	f_capperfiber	0.576086	0.339586	FALSE	none	NA
PMO000938	f_capperfiber	0.047773	0.882025	TRUE	P	re
PMO000941	f_capperfiber	0.174052	-0.715642	FALSE	none	NA
PMO000944	f_capperfiber	0.282241	-0.602473	FALSE	none	NA
PMO000945	f_capperfiber	0.874967	0.0983595	FALSE	none	NA
PMO000946	f_capperfiber	0.00897359	0.961621	TRUE	P	re
PMO000947	f_capperfiber	0.260884	-0.623706	FALSE	none	NA
PMO000949	f_capperfiber	0.0800691	-0.832674	FALSE	none	NA
PMO000950	f_capperfiber	0.319333	-0.566564	FALSE	none	NA
PMO000951	f_capperfiber	0.262747	-0.621836	FALSE	none	NA
PMO000952	f_capperfiber	0.00474095	-0.974952	TRUE	N	re
PMO000953	f_capperfiber	0.0928828	0.814919	FALSE	none	NA
PMO000954	f_capperfiber	0.8863	-0.0894189	FALSE	none	NA
PMO000957	f_capperfiber	0.560736	0.352435	FALSE	none	NA
PMO000959	f_capperfiber	0.156046	0.736206	FALSE	none	NA
PMO000960	f_capperfiber	0.814751	-0.146014	FALSE	none	NA
PMO000961	f_capperfiber	0.696595	-0.240637	FALSE	none	NA
PMO000962	f_capperfiber	0.372731	-0.516664	FALSE	none	NA
PMO000964	f_capperfiber	0.676469	0.256957	FALSE	none	NA
PMO000965	f_capperfiber	0.369008	-0.520084	FALSE	none	NA
PMO000966	f_capperfiber	0.652479	-0.276508	FALSE	none	NA
PMO000967	f_capperfiber	0.317702	-0.56812	FALSE	none	NA
PMO000968	f_capperfiber	0.244896	-0.639906	FALSE	none	NA
PMO000974	f_capperfiber	0.568701	-0.34576	FALSE	none	NA
PMO000975	f_capperfiber	0.000612608	0.99361	TRUE	P	ri
PMO000978	f_capperfiber	0.334576	-0.552122	FALSE	none	NA
PMO000979	f_capperfiber	0.624559	0.299406	FALSE	none	NA
PMO000981	f_capperfiber	0.0948646	-0.812242	FALSE	none	NA
PMO000982	f_capperfiber	0.874809	-0.098484	FALSE	none	NA
PMO000983	f_capperfiber	0.86468	-0.106482	FALSE	none	NA
PMO000986	f_capperfiber	0.134669	-0.761544	FALSE	none	NA
PMO000987	f_capperfiber	0.566835	-0.347322	FALSE	none	NA
PMO000988	f_capperfiber	0.39203	-0.499068	FALSE	none	NA
PMO000989	f_capperfiber	0.182111	-0.706639	FALSE	none	NA
PMO000991	f_capperfiber	0.746939	0.200097	FALSE	none	NA
PMO000992	f_capperfiber	0.968419	0.0248063	FALSE	none	NA
PMO000993	f_capperfiber	0.0810137	0.831337	FALSE	none	NA
PMO000994	f_capperfiber	0.603299	-0.316958	FALSE	none	NA
PMO000995	f_capperfiber	0.186587	-0.701688	FALSE	none	NA
PMO000996	f_capperfiber	0.268667	-0.615917	FALSE	none	NA
PMO000997	f_capperfiber	0.773227	0.179068	FALSE	none	NA
PMO000998	f_capperfiber	0.526877	-0.381021	FALSE	none	NA
PMO000999	f_capperfiber	0.417768	-0.475916	FALSE	none	NA
PMO001000	f_capperfiber	0.0507373	-0.877131	FALSE	none	NA
PMO001001	f_capperfiber	0.457262	-0.44101	FALSE	none	NA
PMO001002	f_capperfiber	0.202596	-0.684248	FALSE	none	NA
PMO001003	f_capperfiber	0.144475	-0.749785	FALSE	none	NA
PMO001004	f_capperfiber	0.181605	-0.707202	FALSE	none	NA
PMO001006	f_capperfiber	0.534287	-0.374735	FALSE	none	NA
PMO001007	f_capperfiber	0.741079	-0.204796	FALSE	none	NA
PMO001008	f_capperfiber	0.550507	-0.361035	FALSE	none	NA
PMO001011	f_capperfiber	0.335738	0.551027	FALSE	none	NA
PMO001012	f_capperfiber	0.862083	-0.108534	FALSE	none	NA
PMO001014	f_capperfiber	0.789296	-0.166255	FALSE	none	NA
PMO001017	f_capperfiber	0.158976	-0.732815	FALSE	none	NA
PMO001019	f_capperfiber	0.446635	-0.450334	FALSE	none	NA
PMO001021	f_capperfiber	0.154825	-0.737625	FALSE	none	NA
PMO001022	f_capperfiber	0.542117	-0.368112	FALSE	none	NA
PMO001024	f_capperfiber	0.00344255	0.979774	TRUE	P	ri
PMO001025	f_capperfiber	0.546582	-0.364343	FALSE	none	NA
PMO001026	f_capperfiber	0.196524	-0.690816	FALSE	none	NA
PMO001030	f_capperfiber	0.460163	-0.438473	FALSE	none	NA
PMO001031	f_capperfiber	0.342807	-0.544392	FALSE	none	NA
PMO001032	f_capperfiber	0.68119	-0.253122	FALSE	none	NA
PMO001033	f_capperfiber	0.143449	-0.751004	FALSE	none	NA
PMO001034	f_capperfiber	0.529944	-0.378417	FALSE	none	NA
PMO001035	f_capperfiber	0.136677	0.759116	FALSE	none	NA
PMO001036	f_capperfiber	0.267646	0.616935	FALSE	none	NA
PMO001039	f_capperfiber	0.649053	-0.279309	FALSE	none	NA
PMO001043	f_capperfiber	0.124911	-0.773501	FALSE	none	NA
PMO001044	f_capperfiber	0.462958	0.436032	FALSE	none	NA
PMO001045	f_capperfiber	0.115247	-0.785619	FALSE	none	NA
PMO001048	f_capperfiber	0.15397	-0.73862	FALSE	none	NA
PMO001054	f_capperfiber	0.299112	-0.585998	FALSE	none	NA
PMO001057	f_capperfiber	0.900487	-0.0782374	FALSE	none	NA
PMO001058	f_capperfiber	0.37774	-0.512076	FALSE	none	NA
PMO001059	f_capperfiber	0.096797	-0.809649	FALSE	none	NA
PMO001060	f_capperfiber	0.355458	-0.5326	FALSE	none	NA
PMO001061	f_capperfiber	0.326874	-0.559398	FALSE	none	NA
PMO001062	f_capperfiber	0.609064	-0.312188	FALSE	none	NA
PMO001063	f_capperfiber	0.221909	-0.663714	FALSE	none	NA
PMO001064	f_capperfiber	0.517519	-0.388985	FALSE	none	NA
PMO001066	f_capperfiber	0.584416	-0.332639	FALSE	none	NA
PMO001067	f_capperfiber	0.239161	-0.645787	FALSE	none	NA
PMO001070	f_capperfiber	0.6329	-0.292548	FALSE	none	NA
PMO001071	f_capperfiber	0.0246041	0.924531	TRUE	P	ri
PMO001072	f_capperfiber	0.191729	0.696042	FALSE	none	NA
PMO001075	f_capperfiber	0.139496	0.755725	FALSE	none	NA
PMO001076	f_capperfiber	0.769459	-0.182077	FALSE	none	NA
PMO001077	f_capperfiber	0.415875	0.477607	FALSE	none	NA
PMO001078	f_capperfiber	0.470424	-0.429528	FALSE	none	NA
PMO001079	f_capperfiber	0.954157	-0.0360131	FALSE	none	NA
PMO001080	f_capperfiber	0.812022	-0.148181	FALSE	none	NA
PMO001081	f_capperfiber	0.644167	-0.283308	FALSE	none	NA
PMO001082	f_capperfiber	0.736477	-0.208491	FALSE	none	NA
PMO001084	f_capperfiber	0.107945	-0.794979	FALSE	none	NA
PMO001086	f_capperfiber	0.0376297	-0.899561	TRUE	N	re
PMO001087	f_capperfiber	0.177283	-0.712019	FALSE	none	NA
PMO001088	f_capperfiber	0.255888	0.628739	FALSE	none	NA
PMO001089	f_capperfiber	0.508984	0.396274	FALSE	none	NA
PMO001090	f_capperfiber	0.171388	-0.718645	FALSE	none	NA
PMO001091	f_capperfiber	0.157341	-0.734705	FALSE	none	NA
PMO001092	f_capperfiber	0.822789	-0.139637	FALSE	none	NA
PMO001093	f_capperfiber	0.774582	-0.177987	FALSE	none	NA
PMO001094	f_capperfiber	0.876671	-0.0970147	FALSE	none	NA
PMO001096	f_capperfiber	0.367393	-0.521569	FALSE	none	NA
PMO001097	f_capperfiber	0.278161	-0.606495	FALSE	none	NA
PMO001100	f_capperfiber	0.338578	0.548357	FALSE	none	NA
PMO001104	f_capperfiber	0.352459	-0.535385	FALSE	none	NA
PMO001105	f_capperfiber	0.373542	-0.51592	FALSE	none	NA
PMO001106	f_capperfiber	0.293156	-0.591786	FALSE	none	NA
PMO001107	f_capperfiber	0.316155	-0.569597	FALSE	none	NA
PMO001108	f_capperfiber	0.289836	-0.595026	FALSE	none	NA
PMO001109	f_capperfiber	0.106444	-0.796927	FALSE	none	NA
PMO001111	f_capperfiber	0.336399	-0.550405	FALSE	none	NA
PMO001112	f_capperfiber	0.468805	-0.430936	FALSE	none	NA
PMO001114	f_capperfiber	0.329555	0.55686	FALSE	none	NA
PMO001116	f_capperfiber	0.201048	-0.685917	FALSE	none	NA
PMO001117	f_capperfiber	0.69691	-0.240382	FALSE	none	NA
PMO001121	f_capperfiber	0.549295	0.362056	FALSE	none	NA
PMO001122	f_capperfiber	0.874969	-0.0983582	FALSE	none	NA
PMO001123	f_capperfiber	0.335369	-0.551375	FALSE	none	NA
PMO001124	f_capperfiber	0.275863	-0.608768	FALSE	none	NA
PMO001125	f_capperfiber	0.267548	-0.617033	FALSE	none	NA
PMO001126	f_capperfiber	0.152425	-0.740423	FALSE	none	NA
PMO001128	f_capperfiber	0.742185	-0.203909	FALSE	none	NA
PMO001133	f_capperfiber	0.370655	-0.518569	FALSE	none	NA
PMO001134	f_capperfiber	0.669214	0.262857	FALSE	none	NA
PMO001135	f_capperfiber	0.204886	-0.681785	FALSE	none	NA
PMO001136	f_capperfiber	0.21206	-0.67412	FALSE	none	NA
PMO001137	f_capperfiber	0.132475	-0.76421	FALSE	none	NA
PMO001138	f_capperfiber	0.445966	-0.450922	FALSE	none	NA
PMO001139	f_capperfiber	0.179665	-0.70936	FALSE	none	NA
PMO001140	f_capperfiber	0.131228	-0.76573	FALSE	none	NA
PMO001141	f_capperfiber	0.367674	-0.52131	FALSE	none	NA
PMO001142	f_capperfiber	0.405511	0.486899	FALSE	none	NA
PMO001143	f_capperfiber	0.292789	-0.592143	FALSE	none	NA
PMO001147	f_capperfiber	0.26351	-0.621071	FALSE	none	NA
PMO001148	f_capperfiber	0.748048	-0.199208	FALSE	none	NA
PMO001149	f_capperfiber	0.0532553	-0.873045	FALSE	none	NA
PMO001150	f_capperfiber	0.391752	-0.49932	FALSE	none	NA
PMO001151	f_capperfiber	0.638198	-0.288199	FALSE	none	NA
PMO001153	f_capperfiber	0.0836169	-0.827676	FALSE	none	NA
PMO001156	f_capperfiber	0.94688	0.0417328	FALSE	none	NA
PMO001157	f_capperfiber	0.547292	0.363744	FALSE	none	NA
PMO001158	f_capperfiber	0.719204	-0.222383	FALSE	none	NA
PMO001159	f_capperfiber	0.228365	-0.656962	FALSE	none	NA
PMO001160	f_capperfiber	0.0615557	0.859983	FALSE	none	NA
PMO001161	f_capperfiber	0.942424	0.0452356	FALSE	none	NA
PMO001162	f_capperfiber	0.723871	0.218625	FALSE	none	NA
PMO001164	f_capperfiber	0.702087	-0.236196	FALSE	none	NA
PMO001166	f_capperfiber	0.272475	-0.612128	FALSE	none	NA
PMO001168	f_capperfiber	0.943125	0.0446846	FALSE	none	NA
PMO001170	f_capperfiber	0.650322	-0.278271	FALSE	none	NA
PMO001172	f_capperfiber	0.55947	-0.353498	FALSE	none	NA
PMO001174	f_capperfiber	0.237004	-0.648008	FALSE	none	NA
PMO001175	f_capperfiber	0.161655	-0.72973	FALSE	none	NA
PMO001177	f_capperfiber	0.359343	-0.529	FALSE	none	NA
PMO001178	f_capperfiber	0.760319	-0.189384	FALSE	none	NA
PMO001179	f_capperfiber	0.129101	-0.768334	FALSE	none	NA
PMO001180	f_capperfiber	0.761646	-0.188322	FALSE	none	NA
PMO001181	f_capperfiber	0.99707	0.002301	FALSE	none	NA
PMO001183	f_capperfiber	0.478833	-0.422228	FALSE	none	NA
PMO001184	f_capperfiber	0.332409	-0.554165	FALSE	none	NA
PMO001185	f_capperfiber	0.302949	0.582285	FALSE	none	NA
PMO001188	f_capperfiber	0.485117	-0.416791	FALSE	none	NA
PMO001192	f_capperfiber	0.417799	-0.475888	FALSE	none	NA
PMO001193	f_capperfiber	0.182512	-0.706194	FALSE	none	NA
PMO001194	f_capperfiber	0.136748	-0.75903	FALSE	none	NA
PMO001195	f_capperfiber	0.30414	-0.581134	FALSE	none	NA
PMO001196	f_capperfiber	0.90908	-0.0714693	FALSE	none	NA
PMO001197	f_capperfiber	0.417857	-0.475836	FALSE	none	NA
PMO001198	f_capperfiber	0.77982	0.173808	FALSE	none	NA
PMO001199	f_capperfiber	0.351084	-0.536665	FALSE	none	NA
PMO001201	f_capperfiber	0.329366	-0.557039	FALSE	none	NA
PMO001202	f_capperfiber	0.260333	-0.62426	FALSE	none	NA
PMO001203	f_capperfiber	0.066955	-0.851783	FALSE	none	NA
PMO001207	f_capperfiber	0.128648	-0.768889	FALSE	none	NA
PMO001208	f_capperfiber	0.0208983	-0.932367	TRUE	N	re
PMO001209	f_capperfiber	0.428885	-0.466018	FALSE	none	NA
PMO001210	f_capperfiber	0.889831	-0.0866353	FALSE	none	NA
PMO001212	f_capperfiber	0.167577	-0.722963	FALSE	none	NA
PMO001213	f_capperfiber	0.254673	-0.629967	FALSE	none	NA
PMO001214	f_capperfiber	0.41354	0.479695	FALSE	none	NA
PMO001215	f_capperfiber	0.416766	-0.47681	FALSE	none	NA
PMO001217	f_capperfiber	0.0314452	0.910997	TRUE	P	re
PMO001218	f_capperfiber	0.810168	-0.149654	FALSE	none	NA
PMO001219	f_capperfiber	0.970115	0.0234741	FALSE	none	NA
PMO001220	f_capperfiber	0.518143	0.388453	FALSE	none	NA
PMO001221	f_capperfiber	0.680836	0.25341	FALSE	none	NA
PMO001222	f_capperfiber	0.108805	-0.793866	FALSE	none	NA
PMO001223	f_capperfiber	0.709479	-0.230225	FALSE	none	NA
PMO001224	f_capperfiber	0.442807	-0.453704	FALSE	none	NA
PMO001225	f_capperfiber	0.285983	-0.598797	FALSE	none	NA
PMO001226	f_capperfiber	0.422115	-0.472038	FALSE	none	NA
PMO001227	f_capperfiber	0.270689	-0.613903	FALSE	none	NA
PMO001228	f_capperfiber	0.283424	-0.60131	FALSE	none	NA
PMO001229	f_capperfiber	0.0596717	0.862896	FALSE	none	NA
PMO001230	f_capperfiber	0.361668	-0.52685	FALSE	none	NA
PMO001231	f_capperfiber	0.262649	0.621934	FALSE	none	NA
PMO001232	f_capperfiber	0.460709	-0.437996	FALSE	none	NA
PMO001233	f_capperfiber	0.238239	-0.646736	FALSE	none	NA
PMO001234	f_capperfiber	0.307141	-0.578242	FALSE	none	NA
PMO001235	f_capperfiber	0.504289	-0.400294	FALSE	none	NA
PMO001236	f_capperfiber	0.226627	-0.658775	FALSE	none	NA
PMO001237	f_capperfiber	0.481244	-0.42014	FALSE	none	NA
PMO001239	f_capperfiber	0.278125	-0.606531	FALSE	none	NA
PMO001240	f_capperfiber	0.377808	-0.512015	FALSE	none	NA
PMO001242	f_capperfiber	0.622085	-0.301443	FALSE	none	NA
PMO001243	f_capperfiber	0.784079	-0.170413	FALSE	none	NA
PMO001244	f_capperfiber	0.920553	-0.0624379	FALSE	none	NA
PMO001245	f_capperfiber	0.172443	-0.717454	FALSE	none	NA
PMO001246	f_capperfiber	0.317142	-0.568654	FALSE	none	NA
PMO001247	f_capperfiber	0.349417	-0.538217	FALSE	none	NA
PMO001248	f_capperfiber	0.111844	-0.789959	FALSE	none	NA
PMO001249	f_capperfiber	0.250126	-0.634576	FALSE	none	NA
PMO001250	f_capperfiber	0.0326103	-0.908791	TRUE	N	re
PMO001251	f_capperfiber	0.849458	0.118513	FALSE	none	NA
PMO001254	f_capperfiber	0.72259	-0.219656	FALSE	none	NA
PMO001255	f_capperfiber	0.487621	-0.414629	FALSE	none	NA
PMO001259	f_capperfiber	0.180356	-0.70859	FALSE	none	NA
PMO001260	f_capperfiber	0.58182	0.334802	FALSE	none	NA
PMO001263	f_capperfiber	0.0409685	-0.89364	TRUE	N	ri
PMO001264	f_capperfiber	0.311054	0.574482	FALSE	none	NA
PMO001265	f_capperfiber	0.738519	-0.206851	FALSE	none	NA
PMO001267	f_capperfiber	0.593365	-0.325196	FALSE	none	NA
PMO001268	f_capperfiber	0.324104	-0.562025	FALSE	none	NA
PMO001269	f_capperfiber	0.150727	-0.74241	FALSE	none	NA
PMO001270	f_capperfiber	0.356304	-0.531815	FALSE	none	NA
PMO001272	f_capperfiber	0.442648	-0.453844	FALSE	none	NA
PMO001273	f_capperfiber	0.302083	-0.583122	FALSE	none	NA
PMO001274	f_capperfiber	0.0137256	0.948985	TRUE	P	re
PMO001275	f_capperfiber	0.30315	-0.582091	FALSE	none	NA
PMO001278	f_capperfiber	0.238959	-0.645994	FALSE	none	NA
PMO001279	f_capperfiber	0.808499	-0.15098	FALSE	none	NA
PMO001280	f_capperfiber	0.262189	-0.622396	FALSE	none	NA
PMO001281	f_capperfiber	0.0485153	-0.88079	TRUE	N	re
PMO001282	f_capperfiber	0.214406	-0.67163	FALSE	none	NA
PMO001283	f_capperfiber	0.549506	-0.361878	FALSE	none	NA
PMO001284	f_capperfiber	0.939135	0.0478213	FALSE	none	NA
PMO001285	f_capperfiber	0.295935	-0.589082	FALSE	none	NA
PMO001286	f_capperfiber	0.160895	-0.730604	FALSE	none	NA
PMO001287	f_capperfiber	0.353225	-0.534673	FALSE	none	NA
PMO001288	f_capperfiber	0.335084	-0.551643	FALSE	none	NA
PMO001289	f_capperfiber	0.168658	-0.721736	FALSE	none	NA
PMO001290	f_capperfiber	0.865236	-0.106042	FALSE	none	NA
PMO001292	f_capperfiber	0.607957	-0.313103	FALSE	none	NA
PMO001293	f_capperfiber	0.254655	-0.629985	FALSE	none	NA
PMO001294	f_capperfiber	0.456508	-0.44167	FALSE	none	NA
PMO001295	f_capperfiber	0.967819	-0.0252773	FALSE	none	NA
PMO001296	f_capperfiber	0.764555	-0.185996	FALSE	none	NA
PMO001298	f_capperfiber	0.80263	-0.155644	FALSE	none	NA
PMO001299	f_capperfiber	0.474742	-0.425776	FALSE	none	NA
PMO001300	f_capperfiber	0.566453	-0.347642	FALSE	none	NA
PMO001301	f_capperfiber	0.253883	-0.630766	FALSE	none	NA
PMO001305	f_capperfiber	0.526341	0.381476	FALSE	none	NA
PMO001306	f_capperfiber	0.0988396	-0.806924	FALSE	none	NA
PMO001307	f_capperfiber	0.356007	-0.532091	FALSE	none	NA
PMO001308	f_capperfiber	0.229817	0.655451	FALSE	none	NA
PMO001309	f_capperfiber	0.0329797	0.908097	TRUE	P	re
PMO001310	f_capperfiber	0.339538	-0.547456	FALSE	none	NA
PMO001311	f_capperfiber	0.407104	-0.485467	FALSE	none	NA
PMO001312	f_capperfiber	0.270217	-0.614373	FALSE	none	NA
PMO001314	f_capperfiber	0.140869	0.754081	FALSE	none	NA
PMO001315	f_capperfiber	0.604577	-0.3159	FALSE	none	NA
PMO001317	f_capperfiber	0.898473	0.0798237	FALSE	none	NA
PMO001318	f_capperfiber	0.920464	-0.062508	FALSE	none	NA
PMO001320	f_capperfiber	0.0556843	-0.86916	FALSE	none	NA
PMO001322	f_capperfiber	0.49733	-0.406267	FALSE	none	NA
PMO001323	f_capperfiber	0.67828	-0.255486	FALSE	none	NA
PMO001325	f_capperfiber	0.351364	-0.536404	FALSE	none	NA
PMO001327	f_capperfiber	0.269027	-0.615558	FALSE	none	NA
PMO001328	f_capperfiber	0.235264	0.649805	FALSE	none	NA
PMO001329	f_capperfiber	0.0780686	-0.835523	FALSE	none	NA
PMO001332	f_capperfiber	0.0548609	-0.870471	FALSE	none	NA
PMO001334	f_capperfiber	0.439468	-0.456649	FALSE	none	NA
PMO001336	f_capperfiber	0.170216	-0.71997	FALSE	none	NA
PMO001337	f_capperfiber	0.0485239	-0.880776	TRUE	N	re
PMO001338	f_capperfiber	0.23267	-0.652489	FALSE	none	NA
PMO001339	f_capperfiber	0.665693	-0.265725	FALSE	none	NA
PMO001340	f_capperfiber	0.451676	-0.445904	FALSE	none	NA
PMO001344	f_capperfiber	0.293449	-0.5915	FALSE	none	NA
PMO001345	f_capperfiber	0.330103	-0.556342	FALSE	none	NA
PMO001346	f_capperfiber	0.620235	0.302967	FALSE	none	NA
PMO001347	f_capperfiber	0.599408	-0.320182	FALSE	none	NA
PMO001348	f_capperfiber	0.16436	-0.726631	FALSE	none	NA
PMO001349	f_capperfiber	0.826595	-0.136618	FALSE	none	NA
PMO001351	f_capperfiber	0.247174	0.637581	FALSE	none	NA
PMO001352	f_capperfiber	0.574868	-0.340603	FALSE	none	NA
PMO001353	f_capperfiber	0.578618	-0.337472	FALSE	none	NA
PMO001354	f_capperfiber	0.691883	0.244452	FALSE	none	NA
PMO001356	f_capperfiber	0.227183	-0.658194	FALSE	none	NA
PMO001359	f_capperfiber	0.304264	-0.581016	FALSE	none	NA
PMO001361	f_capperfiber	0.228299	-0.657031	FALSE	none	NA
PMO001365	f_capperfiber	0.405814	0.486626	FALSE	none	NA
PMO001366	f_capperfiber	0.327384	-0.558915	FALSE	none	NA
PMO001368	f_capperfiber	0.326912	-0.559362	FALSE	none	NA
PMO001369	f_capperfiber	0.365511	-0.523303	FALSE	none	NA
PMO001371	f_capperfiber	0.614062	-0.308059	FALSE	none	NA
PMO001372	f_capperfiber	0.134596	-0.761633	FALSE	none	NA
PMO001375	f_capperfiber	0.15002	-0.74324	FALSE	none	NA
PMO001376	f_capperfiber	0.41242	-0.480698	FALSE	none	NA
PMO001377	f_capperfiber	0.234817	-0.650267	FALSE	none	NA
PMO001379	f_capperfiber	0.89098	0.0857293	FALSE	none	NA
PMO001380	f_capperfiber	0.319867	-0.566055	FALSE	none	NA
PMO001381	f_capperfiber	0.349092	-0.53852	FALSE	none	NA
PMO001382	f_capperfiber	0.285995	-0.598785	FALSE	none	NA
PMO001383	f_capperfiber	0.0345201	-0.905229	TRUE	N	ri
PMO001387	f_capperfiber	0.156234	0.735987	FALSE	none	NA
PMO001388	f_capperfiber	0.0229182	0.928045	TRUE	P	ri
PMO001389	f_capperfiber	0.252419	0.63225	FALSE	none	NA
PMO001390	f_capperfiber	0.283297	-0.601434	FALSE	none	NA
PMO001391	f_capperfiber	0.630064	-0.294878	FALSE	none	NA
PMO001392	f_capperfiber	0.163783	-0.727291	FALSE	none	NA
PMO001393	f_capperfiber	0.678187	0.255561	FALSE	none	NA
PMO001394	f_capperfiber	0.644077	-0.283381	FALSE	none	NA
PMO001399	f_capperfiber	0.0420109	-0.891823	TRUE	N	re
PMO001401	f_capperfiber	0.965075	-0.0274333	FALSE	none	NA
PMO001402	f_capperfiber	0.181443	-0.707381	FALSE	none	NA
PMO001403	f_capperfiber	0.15835	-0.733538	FALSE	none	NA
PMO001407	f_capperfiber	0.360621	-0.527817	FALSE	none	NA
PMO001408	f_capperfiber	0.369402	-0.519721	FALSE	none	NA
PMO001409	f_capperfiber	0.335564	-0.551191	FALSE	none	NA
PMO001413	f_capperfiber	0.260488	-0.624104	FALSE	none	NA
PMO001414	f_capperfiber	0.461065	0.437685	FALSE	none	NA
PMO001415	f_capperfiber	0.360282	0.528131	FALSE	none	NA
PMO001416	f_capperfiber	0.262432	-0.622152	FALSE	none	NA
PMO001417	f_capperfiber	0.555349	-0.356961	FALSE	none	NA
PMO001420	f_capperfiber	0.992507	0.00588472	FALSE	none	NA
PMO001422	f_capperfiber	0.250319	-0.63438	FALSE	none	NA
PMO001423	f_capperfiber	0.90908	0.0714696	FALSE	none	NA
PMO001424	f_capperfiber	0.283259	-0.601472	FALSE	none	NA
PMO001426	f_capperfiber	0.39764	-0.493992	FALSE	none	NA
PMO001427	f_capperfiber	0.526699	0.381172	FALSE	none	NA
PMO001428	f_capperfiber	0.339125	-0.547844	FALSE	none	NA
PMO001432	f_capperfiber	0.202782	-0.684048	FALSE	none	NA
PMO001434	f_capperfiber	0.302241	-0.582969	FALSE	none	NA
PMO001435	f_capperfiber	0.34045	-0.546601	FALSE	none	NA
PMO001436	f_capperfiber	0.0656647	-0.853723	FALSE	none	NA
PMO001438	f_capperfiber	0.0646188	-0.855304	FALSE	none	NA
PMO001439	f_capperfiber	0.281567	-0.603136	FALSE	none	NA
PMO001440	f_capperfiber	0.405936	-0.486516	FALSE	none	NA
PMO001441	f_capperfiber	0.266755	-0.617824	FALSE	none	NA
PMO001443	f_capperfiber	0.459386	-0.439152	FALSE	none	NA
PMO001444	f_capperfiber	0.768467	-0.18287	FALSE	none	NA
PMO001445	f_capperfiber	0.00982858	-0.95921	TRUE	N	re
PMO001446	f_capperfiber	0.263093	-0.621489	FALSE	none	NA
PMO001449	f_capperfiber	0.879436	0.0948332	FALSE	none	NA
PMO001451	f_capperfiber	0.872928	0.0999688	FALSE	none	NA
PMO001452	f_capperfiber	0.401515	0.490496	FALSE	none	NA
PMO001455	f_capperfiber	0.224871	0.66061	FALSE	none	NA
PMO001456	f_capperfiber	0.545467	-0.365284	FALSE	none	NA
PMO001459	f_capperfiber	0.163961	-0.727087	FALSE	none	NA
PMO001460	f_capperfiber	0.448602	-0.448604	FALSE	none	NA
PMO001461	f_capperfiber	0.0520242	-0.875035	FALSE	none	NA
PMO001462	f_capperfiber	0.275459	-0.609168	FALSE	none	NA
PMO001463	f_capperfiber	0.834341	-0.130479	FALSE	none	NA
PMO001465	f_capperfiber	0.426778	-0.467889	FALSE	none	NA
PMO001467	f_capperfiber	0.190593	-0.697286	FALSE	none	NA
PMO001468	f_capperfiber	0.243624	-0.641208	FALSE	none	NA
PMO001471	f_capperfiber	0.138012	-0.757508	FALSE	none	NA
PMO001472	f_capperfiber	0.494939	-0.408323	FALSE	none	NA
PMO001473	f_capperfiber	0.472081	-0.428087	FALSE	none	NA
PMO001474	f_capperfiber	0.0585804	-0.864597	FALSE	none	NA
PMO001475	f_capperfiber	0.99656	-0.00270166	FALSE	none	NA
PMO001478	f_capperfiber	0.951609	0.0380157	FALSE	none	NA
PMO001479	f_capperfiber	0.576172	-0.339514	FALSE	none	NA
PMO001481	f_capperfiber	0.263168	-0.621414	FALSE	none	NA
PMO001482	f_capperfiber	0.363952	-0.52474	FALSE	none	NA
PMO001483	f_capperfiber	0.643802	-0.283607	FALSE	none	NA
PMO001484	f_capperfiber	0.277322	-0.607325	FALSE	none	NA
PMO001485	f_capperfiber	0.144246	-0.750056	FALSE	none	NA
PMO001486	f_capperfiber	0.846022	-0.121231	FALSE	none	NA
PMO001487	f_capperfiber	0.120792	-0.77863	FALSE	none	NA
PMO001490	f_capperfiber	0.352466	-0.535379	FALSE	none	NA
PMO001491	f_capperfiber	0.35968	-0.528688	FALSE	none	NA
PMO001492	f_capperfiber	0.509811	-0.395566	FALSE	none	NA
PMO001493	f_capperfiber	0.11781	-0.782376	FALSE	none	NA
PMO001494	f_capperfiber	0.934054	-0.0518169	FALSE	none	NA
PMO001495	f_capperfiber	0.154237	0.738308	FALSE	none	NA
PMO001496	f_capperfiber	0.0322818	-0.909411	TRUE	N	re
PMO001499	f_capperfiber	0.299615	-0.58551	FALSE	none	NA
PMO001500	f_capperfiber	0.424227	-0.470158	FALSE	none	NA
PMO001501	f_capperfiber	0.287197	-0.597607	FALSE	none	NA
PMO001502	f_capperfiber	0.427573	-0.467182	FALSE	none	NA
PMO001503	f_capperfiber	0.40785	-0.484797	FALSE	none	NA
PMO001504	f_capperfiber	0.132195	-0.76455	FALSE	none	NA
PMO001505	f_capperfiber	0.302154	-0.583053	FALSE	none	NA
PMO001506	f_capperfiber	0.0419798	-0.891877	TRUE	N	re
PMO001507	f_capperfiber	0.284559	-0.600195	FALSE	none	NA
PMO001508	f_capperfiber	0.775291	0.177421	FALSE	none	NA
PMO001510	f_capperfiber	0.360265	-0.528147	FALSE	none	NA
PMO001511	f_capperfiber	0.334313	-0.552369	FALSE	none	NA
PMO001512	f_capperfiber	0.18593	-0.702413	FALSE	none	NA
PMO001514	f_capperfiber	0.253967	-0.630681	FALSE	none	NA
PMO001515	f_capperfiber	0.323641	-0.562466	FALSE	none	NA
PMO001517	f_capperfiber	0.278181	-0.606475	FALSE	none	NA
PMO001519	f_capperfiber	0.276205	-0.60843	FALSE	none	NA
PMO001523	f_capperfiber	0.772544	0.179614	FALSE	none	NA
PMO001525	f_capperfiber	0.311199	-0.574343	FALSE	none	NA
PMO001526	f_capperfiber	0.211947	-0.674241	FALSE	none	NA
PMO001527	f_capperfiber	0.0483636	-0.881042	TRUE	N	ri
PMO001528	f_capperfiber	0.37193	-0.517399	FALSE	none	NA
PMO001534	f_capperfiber	0.575777	0.339844	FALSE	none	NA
PMO001535	f_capperfiber	0.470908	-0.429107	FALSE	none	NA
PMO001536	f_capperfiber	0.640189	-0.286567	FALSE	none	NA
PMO001538	f_capperfiber	0.351099	-0.536651	FALSE	none	NA
PMO001539	f_capperfiber	0.359509	-0.528846	FALSE	none	NA
PMO001541	f_capperfiber	0.172386	0.717519	FALSE	none	NA
PMO001543	f_capperfiber	0.278735	-0.605928	FALSE	none	NA
PMO001546	f_capperfiber	0.218396	-0.66741	FALSE	none	NA
PMO001547	f_capperfiber	0.51712	0.389325	FALSE	none	NA
PMO001548	f_capperfiber	0.19566	-0.691754	FALSE	none	NA
PMO001549	f_capperfiber	0.257188	-0.627427	FALSE	none	NA
PMO001551	f_capperfiber	0.366676	0.522229	FALSE	none	NA
PMO001552	f_capperfiber	0.402539	-0.489573	FALSE	none	NA
PMO001555	f_capperfiber	0.330036	-0.556405	FALSE	none	NA
PMO001556	f_capperfiber	0.267062	-0.617518	FALSE	none	NA
PMO001557	f_capperfiber	0.857167	0.112418	FALSE	none	NA
PMO001559	f_capperfiber	0.390742	-0.500236	FALSE	none	NA
PMO001560	f_capperfiber	0.237669	-0.647323	FALSE	none	NA
PMO001561	f_capperfiber	0.228536	-0.656784	FALSE	none	NA
PMO001562	f_capperfiber	0.666432	-0.265123	FALSE	none	NA
PMO001563	f_capperfiber	0.403023	-0.489137	FALSE	none	NA
PMO001565	f_capperfiber	0.239157	0.645791	FALSE	none	NA
PMO001566	f_capperfiber	0.704845	0.233966	FALSE	none	NA
PMO001567	f_capperfiber	0.264074	-0.620506	FALSE	none	NA
PMO001569	f_capperfiber	0.438143	-0.457819	FALSE	none	NA
PMO001570	f_capperfiber	0.880751	-0.0937959	FALSE	none	NA
PMO001571	f_capperfiber	0.233675	-0.651448	FALSE	none	NA
PMO001572	f_capperfiber	0.346348	0.54108	FALSE	none	NA
PMO001573	f_capperfiber	0.237231	-0.647775	FALSE	none	NA
PMO001574	f_capperfiber	0.954703	-0.0355837	FALSE	none	NA
PMO001575	f_capperfiber	0.722832	0.219462	FALSE	none	NA
PMO001576	f_capperfiber	0.286457	-0.598332	FALSE	none	NA
PMO001577	f_capperfiber	0.547275	-0.363759	FALSE	none	NA
PMO001578	f_capperfiber	0.575702	-0.339907	FALSE	none	NA
PMO001581	f_capperfiber	0.781598	-0.172391	FALSE	none	NA
PMO001583	f_capperfiber	0.360896	-0.527563	FALSE	none	NA
PMO001584	f_capperfiber	0.955396	0.0350389	FALSE	none	NA
PMO001586	f_capperfiber	0.200986	-0.685983	FALSE	none	NA
PMO001587	f_capperfiber	0.373701	-0.515775	FALSE	none	NA
PMO001589	f_capperfiber	0.602323	-0.317767	FALSE	none	NA
PMO001590	f_capperfiber	0.321784	-0.56423	FALSE	none	NA
PMO001591	f_capperfiber	0.25921	-0.625389	FALSE	none	NA
PMO001592	f_capperfiber	0.312157	-0.573424	FALSE	none	NA
PMO001595	f_capperfiber	0.342443	-0.544732	FALSE	none	NA
PMO001597	f_capperfiber	0.406169	-0.486307	FALSE	none	NA
PMO001599	f_capperfiber	0.895067	-0.0825081	FALSE	none	NA
PMO001601	f_capperfiber	0.28298	-0.601746	FALSE	none	NA
PMO001602	f_capperfiber	0.479113	-0.421986	FALSE	none	NA
PMO001604	f_capperfiber	0.331141	-0.555361	FALSE	none	NA
PMO001607	f_capperfiber	0.175423	-0.714103	FALSE	none	NA
PMO001608	f_capperfiber	0.029913	0.913938	TRUE	P	ri
PMO001609	f_capperfiber	0.981281	0.0147023	FALSE	none	NA
PMO001610	f_capperfiber	0.283377	-0.601356	FALSE	none	NA
PMO001611	f_capperfiber	0.16992	-0.720304	FALSE	none	NA
PMO001612	f_capperfiber	0.359339	-0.529003	FALSE	none	NA
PMO001615	f_capperfiber	0.121717	-0.777473	FALSE	none	NA
PMO001616	f_capperfiber	0.523282	0.384077	FALSE	none	NA
PMO001617	f_capperfiber	0.833281	0.131319	FALSE	none	NA
PMO001618	f_capperfiber	0.898934	-0.0794608	FALSE	none	NA
PMO001619	f_capperfiber	0.432148	-0.463124	FALSE	none	NA
PMO001620	f_capperfiber	0.472869	-0.427402	FALSE	none	NA
PMO001621	f_capperfiber	0.707858	-0.231534	FALSE	none	NA
PMO001622	f_capperfiber	0.265052	-0.619527	FALSE	none	NA
PMO001623	f_capperfiber	0.349077	-0.538534	FALSE	none	NA
PMO001624	f_capperfiber	0.371883	-0.517442	FALSE	none	NA
PMO001625	f_capperfiber	0.0654151	0.8541	FALSE	none	NA
PMO001626	f_capperfiber	0.342805	-0.544394	FALSE	none	NA
PMO001627	f_capperfiber	0.232978	-0.65217	FALSE	none	NA
PMO001631	f_capperfiber	0.396811	0.494741	FALSE	none	NA
PMO001632	f_capperfiber	0.957517	0.0333725	FALSE	none	NA
PMO001634	f_capperfiber	0.690376	-0.245672	FALSE	none	NA
PMO001635	f_capperfiber	0.449371	-0.447929	FALSE	none	NA
PMO001638	f_capperfiber	0.19565	-0.691765	FALSE	none	NA
PMO001640	f_capperfiber	0.433727	-0.461725	FALSE	none	NA
PMO001641	f_capperfiber	0.93394	-0.0519069	FALSE	none	NA
PMO001642	f_capperfiber	0.721768	-0.220318	FALSE	none	NA
PMO001643	f_capperfiber	0.135256	0.760833	FALSE	none	NA
PMO001644	f_capperfiber	0.300679	0.58448	FALSE	none	NA
PMO001645	f_capperfiber	0.580041	-0.336285	FALSE	none	NA
PMO001646	f_capperfiber	0.108327	-0.794485	FALSE	none	NA
PMO001647	f_capperfiber	0.139433	-0.755801	FALSE	none	NA
PMO001648	f_capperfiber	0.231906	-0.653281	FALSE	none	NA
PMO001649	f_capperfiber	0.7426	-0.203577	FALSE	none	NA
PMO001650	f_capperfiber	0.400291	0.491599	FALSE	none	NA
PMO001651	f_capperfiber	0.442901	-0.453621	FALSE	none	NA
PMO001652	f_capperfiber	0.303547	-0.581707	FALSE	none	NA
PMO001653	f_capperfiber	0.104907	-0.798929	FALSE	none	NA
PMO001654	f_capperfiber	0.830715	0.133352	FALSE	none	NA
PMO001655	f_capperfiber	0.328697	-0.557671	FALSE	none	NA
PMO001656	f_capperfiber	0.295085	-0.589908	FALSE	none	NA
PMO001658	f_capperfiber	0.089157	-0.82	FALSE	none	NA
PMO001659	f_capperfiber	0.527733	-0.380294	FALSE	none	NA
PMO001660	f_capperfiber	0.181694	-0.707102	FALSE	none	NA
PMO001661	f_capperfiber	0.191284	-0.696529	FALSE	none	NA
PMO001662	f_capperfiber	0.00534544	0.97286	TRUE	P	ri
PMO001663	f_capperfiber	0.308967	-0.576486	FALSE	none	NA
PMO001665	f_capperfiber	0.718339	0.22308	FALSE	none	NA
PMO001666	f_capperfiber	0.0113818	0.954999	TRUE	P	re
PMO001667	f_capperfiber	0.586824	0.330635	FALSE	none	NA
PMO001668	f_capperfiber	0.170687	0.719437	FALSE	none	NA
PMO001669	f_capperfiber	0.190787	-0.697073	FALSE	none	NA
PMO001671	f_capperfiber	0.0601234	0.862195	FALSE	none	NA
PMO001674	f_capperfiber	0.145238	-0.74888	FALSE	none	NA
PMO001675	f_capperfiber	0.670714	-0.261637	FALSE	none	NA
PMO001676	f_capperfiber	0.533878	-0.375082	FALSE	none	NA
PMO001679	f_capperfiber	0.75886	0.19055	FALSE	none	NA
PMO001680	f_capperfiber	0.930157	-0.0548822	FALSE	none	NA
PMO001683	f_capperfiber	0.231771	-0.653421	FALSE	none	NA
PMO001684	f_capperfiber	0.186432	-0.701859	FALSE	none	NA
PMO001685	f_capperfiber	0.252694	-0.63197	FALSE	none	NA
PMO001686	f_capperfiber	0.350722	-0.537002	FALSE	none	NA
PMO001687	f_capperfiber	0.363219	-0.525417	FALSE	none	NA
PMO001688	f_capperfiber	0.83439	-0.13044	FALSE	none	NA
PMO001689	f_capperfiber	0.202694	-0.684142	FALSE	none	NA
PMO001690	f_capperfiber	0.953221	-0.0367487	FALSE	none	NA
PMO001691	f_capperfiber	0.566318	-0.347755	FALSE	none	NA
PMO001692	f_capperfiber	0.448608	0.448599	FALSE	none	NA
PMO001693	f_capperfiber	0.290717	-0.594165	FALSE	none	NA
PMO001694	f_capperfiber	0.576373	-0.339346	FALSE	none	NA
PMO001695	f_capperfiber	0.083907	-0.827271	FALSE	none	NA
PMO001696	f_capperfiber	0.327316	-0.558979	FALSE	none	NA
PMO001698	f_capperfiber	0.476884	-0.423917	FALSE	none	NA
PMO001700	f_capperfiber	0.590148	-0.32787	FALSE	none	NA
PMO001702	f_capperfiber	0.194191	-0.693354	FALSE	none	NA
PMO001703	f_capperfiber	0.586158	-0.331189	FALSE	none	NA
PMO001705	f_capperfiber	0.404523	-0.487787	FALSE	none	NA
PMO001706	f_capperfiber	0.790132	0.16559	FALSE	none	NA
PMO001707	f_capperfiber	0.230119	-0.655137	FALSE	none	NA
PMO001709	f_capperfiber	0.238623	-0.64634	FALSE	none	NA
PMO001710	f_capperfiber	0.692128	0.244253	FALSE	none	NA
PMO001711	f_capperfiber	0.326265	-0.559975	FALSE	none	NA
PMO001712	f_capperfiber	0.160921	-0.730574	FALSE	none	NA
PMO001715	f_capperfiber	0.136419	-0.759428	FALSE	none	NA
PMO001716	f_capperfiber	0.191536	-0.696253	FALSE	none	NA
PMO001717	f_capperfiber	0.408952	0.483808	FALSE	none	NA
PMO001718	f_capperfiber	0.291053	-0.593837	FALSE	none	NA
PMO001719	f_capperfiber	0.404773	-0.487562	FALSE	none	NA
PMO001720	f_capperfiber	0.188692	-0.699372	FALSE	none	NA
PMO001721	f_capperfiber	0.501985	-0.402269	FALSE	none	NA
PMO001723	f_capperfiber	0.272829	-0.611775	FALSE	none	NA
PMO001724	f_capperfiber	0.263448	-0.621134	FALSE	none	NA
PMO001726	f_capperfiber	0.610346	0.311128	FALSE	none	NA
PMO001727	f_capperfiber	0.4007	0.491231	FALSE	none	NA
PMO001728	f_capperfiber	0.702668	-0.235726	FALSE	none	NA
PMO001729	f_capperfiber	0.544391	-0.366192	FALSE	none	NA
PMO001730	f_capperfiber	0.19009	-0.697837	FALSE	none	NA
PMO001731	f_capperfiber	0.741773	-0.20424	FALSE	none	NA
PMO001732	f_capperfiber	0.419281	-0.474565	FALSE	none	NA
PMO001734	f_capperfiber	0.13627	-0.759607	FALSE	none	NA
PMO001735	f_capperfiber	0.290013	0.594852	FALSE	none	NA
PMO001736	f_capperfiber	0.178732	0.7104	FALSE	none	NA
PMO001739	f_capperfiber	0.0330235	-0.908015	TRUE	N	ri
PMO001740	f_capperfiber	0.702517	-0.235848	FALSE	none	NA
PMO001741	f_capperfiber	0.142827	-0.751745	FALSE	none	NA
PMO001742	f_capperfiber	0.22184	0.663787	FALSE	none	NA
PMO001743	f_capperfiber	0.234532	-0.650561	FALSE	none	NA
PMO001744	f_capperfiber	0.304664	-0.580629	FALSE	none	NA
PMO001745	f_capperfiber	0.65887	-0.271288	FALSE	none	NA
PMO001746	f_capperfiber	0.303387	-0.581862	FALSE	none	NA
PMO001747	f_capperfiber	0.0939904	0.813421	FALSE	none	NA
PMO001748	f_capperfiber	0.138368	-0.75708	FALSE	none	NA
PMO001749	f_capperfiber	0.193011	-0.694641	FALSE	none	NA
PMO001750	f_capperfiber	0.261851	-0.622735	FALSE	none	NA
PMO001751	f_capperfiber	0.163553	-0.727554	FALSE	none	NA
PMO001752	f_capperfiber	0.476061	-0.424631	FALSE	none	NA
PMO001753	f_capperfiber	0.754897	-0.193722	FALSE	none	NA
PMO001754	f_capperfiber	0.60754	-0.313448	FALSE	none	NA
PMO001755	f_capperfiber	0.586419	-0.330972	FALSE	none	NA
PMO001756	f_capperfiber	0.248897	-0.635826	FALSE	none	NA
PMO001757	f_capperfiber	0.931239	-0.0540314	FALSE	none	NA
PMO001758	f_capperfiber	0.0636217	-0.856819	FALSE	none	NA
PMO001759	f_capperfiber	0.872984	0.0999249	FALSE	none	NA
PMO001760	f_capperfiber	0.26306	-0.621522	FALSE	none	NA
PMO001761	f_capperfiber	0.645801	0.281969	FALSE	none	NA
PMO001762	f_capperfiber	0.520689	-0.386284	FALSE	none	NA
PMO001764	f_capperfiber	0.0148418	0.94624	TRUE	P	re
PMO001766	f_capperfiber	0.485018	-0.416877	FALSE	none	NA
PMO001767	f_capperfiber	0.253279	-0.631378	FALSE	none	NA
PMO001769	f_capperfiber	0.0237116	-0.926381	TRUE	N	re
PMO001770	f_capperfiber	0.0204087	0.933435	TRUE	P	ri
PMO001771	f_capperfiber	0.223531	-0.662013	FALSE	none	NA
PMO001772	f_capperfiber	0.544469	0.366125	FALSE	none	NA
PMO001774	f_capperfiber	0.338235	-0.54868	FALSE	none	NA
PMO001775	f_capperfiber	0.680693	0.253526	FALSE	none	NA
PMO001776	f_capperfiber	0.372274	-0.517084	FALSE	none	NA
PMO001777	f_capperfiber	0.313324	-0.572305	FALSE	none	NA
PMO001778	f_capperfiber	0.355093	-0.532939	FALSE	none	NA
PMO001779	f_capperfiber	0.497614	-0.406023	FALSE	none	NA
PMO001780	f_capperfiber	0.245292	-0.639502	FALSE	none	NA
PMO001781	f_capperfiber	0.234861	-0.650221	FALSE	none	NA
PMO001782	f_capperfiber	0.522412	-0.384817	FALSE	none	NA
PMO001783	f_capperfiber	0.153331	0.739364	FALSE	none	NA
PMO001784	f_capperfiber	0.0704452	-0.846592	FALSE	none	NA
PMO001785	f_capperfiber	0.192873	-0.694792	FALSE	none	NA
PMO001786	f_capperfiber	0.0982978	-0.807645	FALSE	none	NA
PMO001787	f_capperfiber	0.329033	0.557354	FALSE	none	NA
PMO001788	f_capperfiber	0.387838	-0.502872	FALSE	none	NA
PMO001789	f_capperfiber	0.306299	-0.579054	FALSE	none	NA
PMO001790	f_capperfiber	0.108392	0.794401	FALSE	none	NA
PMO001792	f_capperfiber	0.18919	-0.698824	FALSE	none	NA
PMO001793	f_capperfiber	0.0474747	-0.882522	TRUE	N	re
PMO001795	f_capperfiber	0.583081	-0.333751	FALSE	none	NA
PMO001796	f_capperfiber	0.264805	-0.619774	FALSE	none	NA
PMO001797	f_capperfiber	0.102257	-0.802403	FALSE	none	NA
PMO001798	f_capperfiber	0.214447	-0.671587	FALSE	none	NA
PMO001799	f_capperfiber	0.169014	-0.721331	FALSE	none	NA
PMO001801	f_capperfiber	0.9465	0.0420315	FALSE	none	NA
PMO001802	f_capperfiber	0.319407	-0.566494	FALSE	none	NA
PMO001803	f_capperfiber	0.704801	-0.234002	FALSE	none	NA
PMO001804	f_capperfiber	0.580485	0.335915	FALSE	none	NA
PMO001805	f_capperfiber	0.0949396	-0.812141	FALSE	none	NA
PMO001806	f_capperfiber	0.152589	0.740231	FALSE	none	NA
PMO001807	f_capperfiber	0.768834	0.182577	FALSE	none	NA
PMO001809	f_capperfiber	0.548573	0.362664	FALSE	none	NA
PMO001814	f_capperfiber	0.26308	0.621502	FALSE	none	NA
PMO001815	f_capperfiber	0.0698601	0.847456	FALSE	none	NA
PMO001817	f_capperfiber	0.151236	-0.741814	FALSE	none	NA
PMO001818	f_capperfiber	0.187945	-0.700193	FALSE	none	NA
PMO001819	f_capperfiber	0.339826	-0.547186	FALSE	none	NA
PMO001821	f_capperfiber	0.329605	-0.556813	FALSE	none	NA
PMO001823	f_capperfiber	0.293808	-0.59115	FALSE	none	NA
PMO001827	f_capperfiber	0.691896	-0.244441	FALSE	none	NA
PMO001829	f_capperfiber	0.217457	-0.668402	FALSE	none	NA
PMO001830	f_capperfiber	0.498196	-0.405523	FALSE	none	NA
PMO001831	f_capperfiber	0.343225	-0.544	FALSE	none	NA
PMO001834	f_capperfiber	0.211756	-0.674443	FALSE	none	NA
PMO001835	f_capperfiber	0.315838	-0.5699	FALSE	none	NA
PMO001836	f_capperfiber	0.125229	-0.773106	FALSE	none	NA
PMO001837	f_capperfiber	0.0903309	0.818392	FALSE	none	NA
PMO001840	f_capperfiber	0.300113	-0.585028	FALSE	none	NA
PMO001842	f_capperfiber	0.0700639	-0.847155	FALSE	none	NA
PMO001843	f_capperfiber	0.478578	-0.422449	FALSE	none	NA
PMO001845	f_capperfiber	0.227819	-0.657531	FALSE	none	NA
PMO001846	f_capperfiber	0.419428	-0.474433	FALSE	none	NA
PMO001847	f_capperfiber	0.404433	-0.487868	FALSE	none	NA
PMO001849	f_capperfiber	0.350115	-0.537567	FALSE	none	NA
PMO001850	f_capperfiber	0.197518	-0.689736	FALSE	none	NA
PMO001854	f_capperfiber	0.399817	-0.492027	FALSE	none	NA
PMO001855	f_capperfiber	0.268429	-0.616154	FALSE	none	NA
PMO001856	f_capperfiber	0.203746	-0.683011	FALSE	none	NA
PMO001858	f_capperfiber	0.20009	-0.686952	FALSE	none	NA
PMO001859	f_capperfiber	0.272323	-0.612279	FALSE	none	NA
PMO001864	f_capperfiber	0.164013	-0.727027	FALSE	none	NA
PMO001865	f_capperfiber	0.338163	-0.548747	FALSE	none	NA
PMO001869	f_capperfiber	0.413445	-0.47978	FALSE	none	NA
PMO001871	f_capperfiber	0.529823	-0.37852	FALSE	none	NA
PMO001873	f_capperfiber	0.267117	-0.617463	FALSE	none	NA
PMO001874	f_capperfiber	0.355044	-0.532984	FALSE	none	NA
PMO001875	f_capperfiber	0.263414	-0.621167	FALSE	none	NA
PMO001876	f_capperfiber	0.333583	-0.553057	FALSE	none	NA
PMO001877	f_capperfiber	0.29874	-0.586359	FALSE	none	NA
PMO001878	f_capperfiber	0.036512	-0.901581	TRUE	N	re
PMO001879	f_capperfiber	0.326857	-0.559414	FALSE	none	NA
PMO001880	f_capperfiber	0.467223	-0.432314	FALSE	none	NA
PMO001881	f_capperfiber	0.209056	-0.677321	FALSE	none	NA
PMO001883	f_capperfiber	0.812069	0.148144	FALSE	none	NA
PMO001885	f_capperfiber	0.297221	-0.587832	FALSE	none	NA
PMO001887	f_capperfiber	0.886296	-0.0894222	FALSE	none	NA
PMO001889	f_capperfiber	0.168951	0.721403	FALSE	none	NA
PMO001890	f_capperfiber	0.125041	-0.773339	FALSE	none	NA
PMO001891	f_capperfiber	0.169503	-0.720777	FALSE	none	NA
PMO001896	f_capperfiber	0.0661871	-0.852936	FALSE	none	NA
PMO001902	f_capperfiber	0.595649	-0.323301	FALSE	none	NA
PMO001903	f_capperfiber	0.384421	-0.505981	FALSE	none	NA
PMO001905	f_capperfiber	0.712717	0.227613	FALSE	none	NA
PMO001906	f_capperfiber	0.689735	-0.246192	FALSE	none	NA
PMO001907	f_capperfiber	0.996441	-0.00279512	FALSE	none	NA
PMO001908	f_capperfiber	0.569087	-0.345437	FALSE	none	NA
PMO001909	f_capperfiber	0.480131	-0.421104	FALSE	none	NA
PMO001911	f_capperfiber	0.335466	-0.551284	FALSE	none	NA
PMO001912	f_capperfiber	0.955767	-0.0347473	FALSE	none	NA
PMO001913	f_capperfiber	0.326985	-0.559293	FALSE	none	NA
PMO001916	f_capperfiber	0.226464	-0.658944	FALSE	none	NA
PMO001919	f_capperfiber	0.83496	-0.129989	FALSE	none	NA
PMO001920	f_capperfiber	0.354933	-0.533087	FALSE	none	NA
PMO001923	f_capperfiber	0.91567	-0.0662811	FALSE	none	NA
PMO001924	f_capperfiber	0.392829	-0.498345	FALSE	none	NA
PMO001925	f_capperfiber	0.367888	-0.521113	FALSE	none	NA
PMO001927	f_capperfiber	0.508995	-0.396264	FALSE	none	NA
PMO001928	f_capperfiber	0.34644	-0.540994	FALSE	none	NA
PMO001930	f_capperfiber	0.527759	-0.380272	FALSE	none	NA
PMO001931	f_capperfiber	0.880391	-0.0940795	FALSE	none	NA
PMO001934	f_capperfiber	0.526038	-0.381734	FALSE	none	NA
PMO001935	f_capperfiber	0.478785	-0.422269	FALSE	none	NA
PMO001936	f_capperfiber	0.384981	-0.50547	FALSE	none	NA
PMO001937	f_capperfiber	0.972046	0.0219567	FALSE	none	NA
PMO001939	f_capperfiber	0.473243	-0.427078	FALSE	none	NA
PMO001941	f_capperfiber	0.544608	-0.366009	FALSE	none	NA
PMO001942	f_capperfiber	0.214917	-0.671089	FALSE	none	NA
PMO001943	f_capperfiber	0.36813	-0.520891	FALSE	none	NA
PMO001945	f_capperfiber	0.451824	-0.445775	FALSE	none	NA
PMO001946	f_capperfiber	0.86034	0.10991	FALSE	none	NA
PMO001947	f_capperfiber	0.931561	-0.0537776	FALSE	none	NA
PMO001948	f_capperfiber	0.420485	-0.473491	FALSE	none	NA
PMO001949	f_capperfiber	0.55601	0.356405	FALSE	none	NA
PMO001952	f_capperfiber	0.380771	-0.509308	FALSE	none	NA
PMO001953	f_capperfiber	0.55663	-0.355884	FALSE	none	NA
PMO001956	f_capperfiber	0.39548	-0.495945	FALSE	none	NA
PMO001957	f_capperfiber	0.473561	-0.426801	FALSE	none	NA
PMO001959	f_capperfiber	0.405631	-0.48679	FALSE	none	NA
PMO001963	f_capperfiber	0.799886	-0.157827	FALSE	none	NA
PMO001964	f_capperfiber	0.455052	-0.442945	FALSE	none	NA
PMO001966	f_capperfiber	0.631569	0.293641	FALSE	none	NA
PMO001967	f_capperfiber	0.658699	-0.271428	FALSE	none	NA
PMO001970	f_capperfiber	0.032809	0.908418	TRUE	P	re
PMO001971	f_capperfiber	0.507868	-0.397228	FALSE	none	NA
PMO001975	f_capperfiber	0.713338	-0.227112	FALSE	none	NA
PMO001977	f_capperfiber	0.311516	-0.574038	FALSE	none	NA
PMO001978	f_capperfiber	0.457139	-0.441117	FALSE	none	NA
PMO001979	f_capperfiber	0.561844	-0.351506	FALSE	none	NA
PMO001980	f_capperfiber	0.208237	-0.678196	FALSE	none	NA
PMO001983	f_capperfiber	0.569452	-0.345131	FALSE	none	NA
PMO001985	f_capperfiber	0.554021	-0.358078	FALSE	none	NA
PMO001986	f_capperfiber	0.364477	-0.524256	FALSE	none	NA
PMO001987	f_capperfiber	0.43168	-0.463538	FALSE	none	NA
PMO001988	f_capperfiber	0.175852	-0.713621	FALSE	none	NA
PMO001990	f_capperfiber	0.364046	0.524653	FALSE	none	NA
PMO001991	f_capperfiber	0.585217	-0.331972	FALSE	none	NA
PMO001992	f_capperfiber	0.800306	0.157493	FALSE	none	NA
PMO001993	f_capperfiber	0.107052	0.796137	FALSE	none	NA
PMO001994	f_capperfiber	0.305989	-0.579352	FALSE	none	NA
PMO001995	f_capperfiber	0.136423	-0.759423	FALSE	none	NA
PMO001996	f_capperfiber	0.358172	-0.530083	FALSE	none	NA
PMO001997	f_capperfiber	0.531034	-0.377493	FALSE	none	NA
PMO001998	f_capperfiber	0.182312	-0.706417	FALSE	none	NA
PMO001999	f_capperfiber	0.247392	-0.637359	FALSE	none	NA
PMO002000	f_capperfiber	0.208286	0.678144	FALSE	none	NA
PMO002001	f_capperfiber	0.114376	-0.786726	FALSE	none	NA
PMO002002	f_capperfiber	0.0485805	0.880682	TRUE	P	ri
PMO002004	f_capperfiber	0.339104	-0.547863	FALSE	none	NA
PMO002007	f_capperfiber	0.0944925	-0.812744	FALSE	none	NA
PMO002008	f_capperfiber	0.387238	-0.503418	FALSE	none	NA
PMO002010	f_capperfiber	0.299112	0.585998	FALSE	none	NA
PMO002015	f_capperfiber	0.562162	0.351239	FALSE	none	NA
PMO002016	f_capperfiber	0.126389	0.771672	FALSE	none	NA
PMO002017	f_capperfiber	0.213731	-0.672346	FALSE	none	NA
PMO002018	f_capperfiber	0.155713	-0.736593	FALSE	none	NA
PMO002019	f_capperfiber	0.209109	-0.677264	FALSE	none	NA
PMO002023	f_capperfiber	0.254356	-0.630287	FALSE	none	NA
PMO002024	f_capperfiber	0.163938	-0.727112	FALSE	none	NA
PMO002025	f_capperfiber	0.624019	0.299851	FALSE	none	NA
PMO002026	f_capperfiber	0.675299	-0.257908	FALSE	none	NA
PMO002028	f_capperfiber	0.000697895	0.993029	TRUE	P	re
PMO002029	f_capperfiber	0.818625	0.14294	FALSE	none	NA
PMO002032	f_capperfiber	0.385457	0.505037	FALSE	none	NA
PMO002035	f_capperfiber	0.347543	0.539965	FALSE	none	NA
PMO002036	f_capperfiber	0.438862	0.457184	FALSE	none	NA
PMO002037	f_capperfiber	0.0628763	-0.857957	FALSE	none	NA
PMO002038	f_capperfiber	0.0670527	0.851636	FALSE	none	NA
PMO002039	f_capperfiber	0.0990658	-0.806623	FALSE	none	NA
PMO002041	f_capperfiber	0.383449	-0.506866	FALSE	none	NA
PMO002044	f_capperfiber	0.522155	0.385036	FALSE	none	NA
PMO002045	f_capperfiber	0.302845	-0.582386	FALSE	none	NA
PMO002047	f_capperfiber	0.608007	-0.313062	FALSE	none	NA
PMO002049	f_capperfiber	0.147174	-0.74659	FALSE	none	NA
PMO002050	f_capperfiber	0.726041	-0.216879	FALSE	none	NA
PMO002051	f_capperfiber	0.913579	0.0679273	FALSE	none	NA
PMO002052	f_capperfiber	0.076381	0.837943	FALSE	none	NA
PMO002053	f_capperfiber	0.0777021	-0.836047	FALSE	none	NA
PMO002054	f_capperfiber	0.629181	-0.295604	FALSE	none	NA
PMO002057	f_capperfiber	0.339433	-0.547554	FALSE	none	NA
PMO002058	f_capperfiber	0.176983	0.712355	FALSE	none	NA
PMO002059	f_capperfiber	0.640087	0.286651	FALSE	none	NA
PMO002060	f_capperfiber	0.408059	0.484609	FALSE	none	NA
PMO002061	f_capperfiber	0.544748	-0.36589	FALSE	none	NA
PMO002063	f_capperfiber	0.166498	-0.724191	FALSE	none	NA
PMO002064	f_capperfiber	0.423737	0.470594	FALSE	none	NA
PMO002065	f_capperfiber	0.49888	-0.404934	FALSE	none	NA
PMO002067	f_capperfiber	0.648341	0.279891	FALSE	none	NA
PMO002068	f_capperfiber	0.0910095	-0.817466	FALSE	none	NA
PMO002069	f_capperfiber	0.602124	-0.317932	FALSE	none	NA
PMO002070	f_capperfiber	0.929859	-0.0551169	FALSE	none	NA
PMO002072	f_capperfiber	0.108482	-0.794284	FALSE	none	NA
PMO002073	f_capperfiber	0.941562	0.0459135	FALSE	none	NA
PMO002074	f_capperfiber	0.58435	-0.332694	FALSE	none	NA
PMO002076	f_capperfiber	0.327535	-0.558772	FALSE	none	NA
PMO002077	f_capperfiber	0.353019	0.534865	FALSE	none	NA
PMO002078	f_capperfiber	0.214865	-0.671144	FALSE	none	NA
PMO002079	f_capperfiber	0.0568999	0.867236	FALSE	none	NA
PMO002081	f_capperfiber	0.944551	-0.0435634	FALSE	none	NA
PMO002082	f_capperfiber	0.317171	-0.568626	FALSE	none	NA
PMO002083	f_capperfiber	0.235226	0.649844	FALSE	none	NA
PMO002084	f_capperfiber	0.10547	-0.798194	FALSE	none	NA
PMO002085	f_capperfiber	0.282404	-0.602313	FALSE	none	NA
PMO002086	f_capperfiber	0.00844428	-0.963151	TRUE	N	re
PMO002088	f_capperfiber	0.154347	0.738181	FALSE	none	NA
PMO002089	f_capperfiber	0.23528	0.649788	FALSE	none	NA
PMO002091	f_capperfiber	0.596861	-0.322295	FALSE	none	NA
PMO002092	f_capperfiber	0.207996	-0.678454	FALSE	none	NA
PMO002093	f_capperfiber	0.651401	-0.277389	FALSE	none	NA
PMO002094	f_capperfiber	0.130568	-0.766536	FALSE	none	NA
PMO002095	f_capperfiber	0.825035	-0.137855	FALSE	none	NA
PMO002096	f_capperfiber	0.216491	-0.669422	FALSE	none	NA
PMO002097	f_capperfiber	0.0525177	-0.874235	FALSE	none	NA
PMO002098	f_capperfiber	0.262072	-0.622513	FALSE	none	NA
PMO002100	f_capperfiber	0.324218	-0.561918	FALSE	none	NA
PMO002101	f_capperfiber	0.591926	0.326392	FALSE	none	NA
PMO002102	f_capperfiber	0.208289	-0.678141	FALSE	none	NA
PMO002103	f_capperfiber	0.291404	-0.593494	FALSE	none	NA
PMO002104	f_capperfiber	0.248665	-0.636062	FALSE	none	NA
PMO002105	f_capperfiber	0.869222	0.102895	FALSE	none	NA
PMO002106	f_capperfiber	0.492201	-0.41068	FALSE	none	NA
PMO002107	f_capperfiber	0.28251	-0.602208	FALSE	none	NA
PMO002108	f_capperfiber	0.249476	0.635237	FALSE	none	NA
PMO002109	f_capperfiber	0.50707	-0.397912	FALSE	none	NA
PMO002111	f_capperfiber	0.495485	0.407853	FALSE	none	NA
PMO002112	f_capperfiber	0.2466	-0.638166	FALSE	none	NA
PMO002114	f_capperfiber	0.155518	-0.736819	FALSE	none	NA
PMO002115	f_capperfiber	0.555348	0.356961	FALSE	none	NA
PMO002116	f_capperfiber	0.62205	-0.301472	FALSE	none	NA
PMO002117	f_capperfiber	0.632865	0.292577	FALSE	none	NA
PMO002121	f_capperfiber	0.156304	-0.735907	FALSE	none	NA
PMO002123	f_capperfiber	0.237222	-0.647784	FALSE	none	NA
PMO002124	f_capperfiber	0.868896	0.103152	FALSE	none	NA
PMO002125	f_capperfiber	0.145805	-0.748208	FALSE	none	NA
PMO002126	f_capperfiber	0.354502	-0.533487	FALSE	none	NA
PMO002128	f_capperfiber	0.356126	-0.53198	FALSE	none	NA
PMO002129	f_capperfiber	0.153424	-0.739257	FALSE	none	NA
PMO002130	f_capperfiber	0.366704	-0.522204	FALSE	none	NA
PMO002132	f_capperfiber	0.302069	-0.583135	FALSE	none	NA
PMO002133	f_capperfiber	0.746078	0.200787	FALSE	none	NA
PMO002134	f_capperfiber	0.256664	-0.627956	FALSE	none	NA
PMO002135	f_capperfiber	0.384808	-0.505628	FALSE	none	NA
PMO002136	f_capperfiber	0.734742	0.209885	FALSE	none	NA
PMO002138	f_capperfiber	0.162086	-0.729235	FALSE	none	NA
PMO002139	f_capperfiber	0.87177	0.100883	FALSE	none	NA
PMO002140	f_capperfiber	0.492249	-0.410638	FALSE	none	NA
PMO002141	f_capperfiber	0.241118	-0.643776	FALSE	none	NA
PMO002142	f_capperfiber	0.224466	-0.661034	FALSE	none	NA
PMO002143	f_capperfiber	0.342094	-0.545059	FALSE	none	NA
PMO002145	f_capperfiber	0.191752	-0.696017	FALSE	none	NA
PMO002148	f_capperfiber	0.997686	-0.00181708	FALSE	none	NA
PMO002149	f_capperfiber	0.230839	-0.654389	FALSE	none	NA
PMO002150	f_capperfiber	0.900025	0.0786014	FALSE	none	NA
PMO002151	f_capperfiber	0.510244	-0.395196	FALSE	none	NA
PMO002152	f_capperfiber	0.35413	-0.533833	FALSE	none	NA
PMO002153	f_capperfiber	0.0405373	-0.894396	TRUE	N	re
PMO002154	f_capperfiber	0.140927	-0.754012	FALSE	none	NA
PMO002156	f_capperfiber	0.409149	-0.48363	FALSE	none	NA
PMO002157	f_capperfiber	0.409753	-0.483089	FALSE	none	NA
PMO002158	f_capperfiber	0.119879	-0.779774	FALSE	none	NA
PMO002159	f_capperfiber	0.40174	-0.490293	FALSE	none	NA
PMO002160	f_capperfiber	0.293366	-0.591581	FALSE	none	NA
PMO002163	f_capperfiber	0.710382	-0.229496	FALSE	none	NA
PMO002164	f_capperfiber	0.364446	-0.524285	FALSE	none	NA
PMO002166	f_capperfiber	0.361377	-0.527119	FALSE	none	NA
PMO002167	f_capperfiber	0.729567	0.214043	FALSE	none	NA
PMO002168	f_capperfiber	0.314807	-0.570886	FALSE	none	NA
PMO002169	f_capperfiber	0.120797	-0.778624	FALSE	none	NA
PMO002170	f_capperfiber	0.174027	-0.71567	FALSE	none	NA
PMO002171	f_capperfiber	0.247457	-0.637293	FALSE	none	NA
PMO002172	f_capperfiber	0.138806	-0.756553	FALSE	none	NA
PMO002174	f_capperfiber	0.697988	-0.23951	FALSE	none	NA
PMO002175	f_capperfiber	0.302385	-0.58283	FALSE	none	NA
PMO002177	f_capperfiber	0.0720878	-0.844177	FALSE	none	NA
PMO002178	f_capperfiber	0.125717	-0.772502	FALSE	none	NA
PMO002181	f_capperfiber	0.584197	-0.332822	FALSE	none	NA
PMO002182	f_capperfiber	0.367799	-0.521195	FALSE	none	NA
PMO002183	f_capperfiber	0.332681	-0.553908	FALSE	none	NA
PMO002184	f_capperfiber	0.194328	-0.693205	FALSE	none	NA
PMO002185	f_capperfiber	0.107317	-0.795792	FALSE	none	NA
PMO002186	f_capperfiber	0.637802	-0.288524	FALSE	none	NA
PMO002188	f_capperfiber	0.572293	-0.342755	FALSE	none	NA
PMO002189	f_capperfiber	0.622675	-0.300958	FALSE	none	NA
PMO002191	f_capperfiber	0.10563	-0.797986	FALSE	none	NA
PMO002192	f_capperfiber	0.222692	-0.662893	FALSE	none	NA
PMO002193	f_capperfiber	0.591698	0.326581	FALSE	none	NA
PMO002195	f_capperfiber	0.629932	0.294987	FALSE	none	NA
PMO002196	f_capperfiber	0.356074	-0.532028	FALSE	none	NA
PMO002200	f_capperfiber	0.269856	-0.614732	FALSE	none	NA
PMO002202	f_capperfiber	0.345863	-0.541534	FALSE	none	NA
PMO002203	f_capperfiber	0.275663	0.608966	FALSE	none	NA
PMO002204	f_capperfiber	0.387943	-0.502777	FALSE	none	NA
PMO002205	f_capperfiber	0.861293	-0.109157	FALSE	none	NA
PMO002206	f_capperfiber	0.192571	0.695122	FALSE	none	NA
PMO002208	f_capperfiber	0.464197	-0.434951	FALSE	none	NA
PMO002209	f_capperfiber	0.525931	-0.381825	FALSE	none	NA
PMO002210	f_capperfiber	0.235286	-0.649782	FALSE	none	NA
PMO002211	f_capperfiber	0.111064	-0.790958	FALSE	none	NA
PMO002212	f_capperfiber	0.210654	-0.675617	FALSE	none	NA
PMO002213	f_capperfiber	0.39715	-0.494435	FALSE	none	NA
PMO002217	f_capperfiber	0.462288	-0.436617	FALSE	none	NA
PMO002218	f_capperfiber	0.222608	-0.66298	FALSE	none	NA
PMO002220	f_capperfiber	0.397764	-0.493881	FALSE	none	NA
PMO002221	f_capperfiber	0.65389	-0.275354	FALSE	none	NA
PMO002222	f_capperfiber	0.264441	-0.620139	FALSE	none	NA
PMO002223	f_capperfiber	0.343602	-0.543647	FALSE	none	NA
PMO002225	f_capperfiber	0.797936	0.159378	FALSE	none	NA
PMO002227	f_capperfiber	0.357348	-0.530847	FALSE	none	NA
PMO002228	f_capperfiber	0.157998	-0.733944	FALSE	none	NA
PMO002229	f_capperfiber	0.748314	-0.198995	FALSE	none	NA
PMO002231	f_capperfiber	0.116698	-0.78378	FALSE	none	NA
PMO002232	f_capperfiber	0.0520735	0.874955	FALSE	none	NA
PMO002234	f_capperfiber	0.822265	-0.140052	FALSE	none	NA
PMO002235	f_capperfiber	0.462705	-0.436253	FALSE	none	NA
PMO002236	f_capperfiber	0.269395	-0.615191	FALSE	none	NA
PMO002237	f_capperfiber	0.331801	-0.554739	FALSE	none	NA
PMO002238	f_capperfiber	0.67483	-0.258289	FALSE	none	NA
PMO002239	f_capperfiber	0.281708	-0.602998	FALSE	none	NA
PMO002241	f_capperfiber	0.285254	-0.599513	FALSE	none	NA
PMO002242	f_capperfiber	0.556548	-0.355953	FALSE	none	NA
PMO002245	f_capperfiber	0.632674	-0.292733	FALSE	none	NA
PMO002247	f_capperfiber	0.299968	-0.585168	FALSE	none	NA
PMO002248	f_capperfiber	0.220189	-0.665522	FALSE	none	NA
PMO002249	f_capperfiber	0.265299	-0.61928	FALSE	none	NA
PMO002251	f_capperfiber	0.476133	-0.424569	FALSE	none	NA
PMO002252	f_capperfiber	0.10139	-0.803546	FALSE	none	NA
PMO002253	f_capperfiber	0.328007	0.558325	FALSE	none	NA
PMO002255	f_capperfiber	0.330718	-0.555761	FALSE	none	NA
PMO002256	f_capperfiber	0.369542	-0.519593	FALSE	none	NA
PMO002257	f_capperfiber	0.900139	-0.0785111	FALSE	none	NA
PMO002258	f_capperfiber	0.431986	-0.463267	FALSE	none	NA
PMO002261	f_capperfiber	0.84084	-0.125333	FALSE	none	NA
PMO002262	f_capperfiber	0.259976	-0.624619	FALSE	none	NA
PMO002263	f_capperfiber	0.286055	-0.598727	FALSE	none	NA
PMO002265	f_capperfiber	0.386332	-0.504242	FALSE	none	NA
PMO002266	f_capperfiber	0.138866	0.756482	FALSE	none	NA
PMO002268	f_capperfiber	0.351737	-0.536057	FALSE	none	NA
PMO002270	f_capperfiber	0.362094	-0.526455	FALSE	none	NA
PMO002271	f_capperfiber	0.269368	-0.615219	FALSE	none	NA
PMO002273	f_capperfiber	0.165261	-0.725601	FALSE	none	NA
PMO002274	f_capperfiber	0.159234	-0.732517	FALSE	none	NA
PMO002276	f_capperfiber	0.733351	-0.211002	FALSE	none	NA
PMO002280	f_capperfiber	0.380806	-0.509276	FALSE	none	NA
PMO002282	f_capperfiber	0.710995	-0.229001	FALSE	none	NA
PMO002283	f_capperfiber	0.431427	-0.463763	FALSE	none	NA
PMO002285	f_capperfiber	0.164875	-0.726042	FALSE	none	NA
PMO002288	f_capperfiber	0.387906	-0.50281	FALSE	none	NA
PMO002289	f_capperfiber	0.199974	0.687076	FALSE	none	NA
PMO002290	f_capperfiber	0.264188	-0.620392	FALSE	none	NA
PMO002291	f_capperfiber	0.0287368	-0.916229	TRUE	N	re
PMO002292	f_capperfiber	0.877298	0.0965198	FALSE	none	NA
PMO002296	f_capperfiber	0.454306	-0.443598	FALSE	none	NA
PMO002297	f_capperfiber	0.166371	-0.724335	FALSE	none	NA
PMO002298	f_capperfiber	0.165895	-0.724878	FALSE	none	NA
PMO002299	f_capperfiber	0.807395	0.151857	FALSE	none	NA
PMO002301	f_capperfiber	0.164887	-0.726028	FALSE	none	NA
PMO002302	f_capperfiber	0.314858	-0.570837	FALSE	none	NA
PMO002303	f_capperfiber	0.196847	-0.690464	FALSE	none	NA
PMO002304	f_capperfiber	0.528099	-0.379984	FALSE	none	NA
PMO002305	f_capperfiber	0.355623	-0.532446	FALSE	none	NA
PMO002307	f_capperfiber	0.336674	-0.550147	FALSE	none	NA
PMO002308	f_capperfiber	0.75253	-0.195618	FALSE	none	NA
PMO002309	f_capperfiber	0.168216	-0.722237	FALSE	none	NA
PMO002311	f_capperfiber	0.185997	-0.702339	FALSE	none	NA
PMO002312	f_capperfiber	0.87476	-0.0985228	FALSE	none	NA
PMO002314	f_capperfiber	0.646297	-0.281563	FALSE	none	NA
PMO002315	f_capperfiber	0.488802	-0.413609	FALSE	none	NA
PMO002316	f_capperfiber	0.557261	-0.355353	FALSE	none	NA
PMO002317	f_capperfiber	0.242762	-0.64209	FALSE	none	NA
PMO002318	f_capperfiber	0.561732	-0.3516	FALSE	none	NA
PMO002319	f_capperfiber	0.476322	-0.424405	FALSE	none	NA
PMO002320	f_capperfiber	0.345843	-0.541552	FALSE	none	NA
PMO002321	f_capperfiber	0.34784	0.539688	FALSE	none	NA
PMO002322	f_capperfiber	0.593501	0.325083	FALSE	none	NA
PMO002323	f_capperfiber	0.131488	0.765413	FALSE	none	NA
PMO002324	f_capperfiber	0.23395	-0.651163	FALSE	none	NA
PMO002325	f_capperfiber	0.472476	-0.427743	FALSE	none	NA
PMO002326	f_capperfiber	0.115153	-0.785738	FALSE	none	NA
PMO002327	f_capperfiber	0.822182	0.140118	FALSE	none	NA
PMO002329	f_capperfiber	0.701512	-0.23666	FALSE	none	NA
PMO002330	f_capperfiber	0.31748	-0.568332	FALSE	none	NA
PMO002331	f_capperfiber	0.639481	0.287147	FALSE	none	NA
PMO002332	f_capperfiber	0.494314	-0.408861	FALSE	none	NA
PMO002334	f_capperfiber	0.168735	-0.721647	FALSE	none	NA
PMO002335	f_capperfiber	0.240836	-0.644065	FALSE	none	NA
PMO002336	f_capperfiber	0.281679	-0.603027	FALSE	none	NA
PMO002338	f_capperfiber	0.428197	-0.466628	FALSE	none	NA
PMO002339	f_capperfiber	0.283206	-0.601524	FALSE	none	NA
PMO002341	f_capperfiber	0.29463	-0.590351	FALSE	none	NA
PMO002342	f_capperfiber	0.684614	-0.250343	FALSE	none	NA
PMO002343	f_capperfiber	0.125035	-0.773347	FALSE	none	NA
PMO002344	f_capperfiber	0.84768	0.11992	FALSE	none	NA
PMO002346	f_capperfiber	0.155424	-0.736928	FALSE	none	NA
PMO002347	f_capperfiber	0.12145	-0.777807	FALSE	none	NA
PMO002348	f_capperfiber	0.185781	-0.702577	FALSE	none	NA
PMO002349	f_capperfiber	0.249022	-0.635699	FALSE	none	NA
PMO002350	f_capperfiber	0.874804	-0.098488	FALSE	none	NA
PMO002351	f_capperfiber	0.299948	-0.585188	FALSE	none	NA
PMO002353	f_capperfiber	0.610291	0.311174	FALSE	none	NA
PMO002355	f_capperfiber	0.337986	-0.548914	FALSE	none	NA
PMO002356	f_capperfiber	0.331993	-0.554557	FALSE	none	NA
PMO002358	f_capperfiber	0.394794	-0.496565	FALSE	none	NA
PMO002359	f_capperfiber	0.187347	-0.700851	FALSE	none	NA
PMO002361	f_capperfiber	0.378411	-0.511463	FALSE	none	NA
PMO002362	f_capperfiber	0.584517	-0.332556	FALSE	none	NA
PMO002363	f_capperfiber	0.276824	-0.607817	FALSE	none	NA
PMO002365	f_capperfiber	0.275026	-0.609597	FALSE	none	NA
PMO002366	f_capperfiber	0.847469	-0.120087	FALSE	none	NA
PMO002367	f_capperfiber	0.845687	-0.121497	FALSE	none	NA
PMO002368	f_capperfiber	0.335109	-0.551619	FALSE	none	NA
PMO002371	f_capperfiber	0.0531589	-0.8732	FALSE	none	NA
PMO002372	f_capperfiber	0.199342	-0.68776	FALSE	none	NA
PMO002373	f_capperfiber	0.116711	-0.783764	FALSE	none	NA
PMO002374	f_capperfiber	0.152532	-0.740297	FALSE	none	NA
PMO002375	f_capperfiber	0.466079	-0.43331	FALSE	none	NA
PMO002377	f_capperfiber	0.0664485	0.852543	FALSE	none	NA
PMO002379	f_capperfiber	0.366151	-0.522713	FALSE	none	NA
PMO002381	f_capperfiber	0.367914	-0.52109	FALSE	none	NA
PMO002383	f_capperfiber	0.168588	-0.721814	FALSE	none	NA
PMO002384	f_capperfiber	0.282443	-0.602275	FALSE	none	NA
PMO002385	f_capperfiber	0.254749	-0.62989	FALSE	none	NA
PMO002386	f_capperfiber	0.404515	-0.487795	FALSE	none	NA
PMO002387	f_capperfiber	0.90548	0.074304	FALSE	none	NA
PMO002388	f_capperfiber	0.259301	-0.625298	FALSE	none	NA
PMO002390	f_capperfiber	0.627983	-0.296589	FALSE	none	NA
PMO002392	f_capperfiber	0.108042	0.794853	FALSE	none	NA
PMO002393	f_capperfiber	0.326514	0.559739	FALSE	none	NA
PMO002394	f_capperfiber	0.536963	0.372469	FALSE	none	NA
PMO002396	f_capperfiber	0.243466	-0.64137	FALSE	none	NA
PMO002397	f_capperfiber	0.742379	0.203754	FALSE	none	NA
PMO002399	f_capperfiber	0.14881	-0.744662	FALSE	none	NA
PMO002400	f_capperfiber	0.688576	-0.247131	FALSE	none	NA
PMO002401	f_capperfiber	0.419013	-0.474804	FALSE	none	NA
PMO002402	f_capperfiber	0.592154	-0.326202	FALSE	none	NA
PMO002404	f_capperfiber	0.124888	-0.773528	FALSE	none	NA
PMO002405	f_capperfiber	0.350355	-0.537344	FALSE	none	NA
PMO002406	f_capperfiber	0.553279	0.358702	FALSE	none	NA
PMO002408	f_capperfiber	0.772046	-0.180012	FALSE	none	NA
PMO002409	f_capperfiber	0.564904	-0.34894	FALSE	none	NA
PMO002410	f_capperfiber	0.244433	0.64038	FALSE	none	NA
PMO002411	f_capperfiber	0.558108	-0.354642	FALSE	none	NA
PMO002412	f_capperfiber	0.633351	-0.292178	FALSE	none	NA
PMO002413	f_capperfiber	0.582425	-0.334298	FALSE	none	NA
PMO002414	f_capperfiber	0.725692	0.21716	FALSE	none	NA
PMO002415	f_capperfiber	0.0463165	0.884464	TRUE	P	re
PMO002416	f_capperfiber	0.290105	-0.594762	FALSE	none	NA
PMO002417	f_capperfiber	0.281624	-0.603081	FALSE	none	NA
PMO002418	f_capperfiber	0.0549365	-0.87035	FALSE	none	NA
PMO002419	f_capperfiber	0.41266	-0.480483	FALSE	none	NA
PMO002420	f_capperfiber	0.743154	-0.203132	FALSE	none	NA
PMO002421	f_capperfiber	0.564317	-0.349432	FALSE	none	NA
PMO002422	f_capperfiber	0.0183449	0.938031	TRUE	P	ri
PMO002423	f_capperfiber	0.395236	-0.496166	FALSE	none	NA
PMO002424	f_capperfiber	0.605396	-0.315222	FALSE	none	NA
PMO002425	f_capperfiber	0.470125	-0.429788	FALSE	none	NA
PMO002426	f_capperfiber	0.257436	-0.627177	FALSE	none	NA
PMO002427	f_capperfiber	0.178196	-0.710999	FALSE	none	NA
PMO002428	f_capperfiber	0.062247	-0.858921	FALSE	none	NA
PMO002429	f_capperfiber	0.242363	-0.642499	FALSE	none	NA
PMO002430	f_capperfiber	0.293439	-0.59151	FALSE	none	NA
PMO002431	f_capperfiber	0.343632	0.543619	FALSE	none	NA
PMO002432	f_capperfiber	0.376417	-0.513287	FALSE	none	NA
PMO002434	f_capperfiber	0.360681	-0.527761	FALSE	none	NA
PMO002435	f_capperfiber	0.267326	-0.617255	FALSE	none	NA
PMO002436	f_capperfiber	0.372413	-0.516956	FALSE	none	NA
PMO002440	f_capperfiber	0.226719	-0.658678	FALSE	none	NA
PMO002441	f_capperfiber	0.910115	-0.0706543	FALSE	none	NA
PMO002442	f_capperfiber	0.158214	-0.733696	FALSE	none	NA
PMO002443	f_capperfiber	0.463761	-0.435331	FALSE	none	NA
PMO002445	f_capperfiber	0.0292373	0.915251	TRUE	P	ri
PMO002446	f_capperfiber	0.286239	-0.598546	FALSE	none	NA
PMO002447	f_capperfiber	0.221058	-0.664609	FALSE	none	NA
PMO002448	f_capperfiber	0.412604	0.480534	FALSE	none	NA
PMO002449	f_capperfiber	0.949712	0.0395061	FALSE	none	NA
PMO002450	f_capperfiber	0.339566	-0.54743	FALSE	none	NA
PMO002451	f_capperfiber	0.969978	0.0235816	FALSE	none	NA
PMO002452	f_capperfiber	0.407178	0.4854	FALSE	none	NA
PMO002453	f_capperfiber	0.357037	-0.531135	FALSE	none	NA
PMO002454	f_capperfiber	0.249073	-0.635647	FALSE	none	NA
PMO002455	f_capperfiber	0.202126	-0.684754	FALSE	none	NA
PMO002456	f_capperfiber	0.363053	-0.52557	FALSE	none	NA
PMO002458	f_capperfiber	0.432825	-0.462523	FALSE	none	NA
PMO002460	f_capperfiber	0.870191	-0.102129	FALSE	none	NA
PMO002461	f_capperfiber	0.277513	-0.607136	FALSE	none	NA
PMO002462	f_capperfiber	0.236418	-0.648613	FALSE	none	NA
PMO002463	f_capperfiber	0.684294	-0.250603	FALSE	none	NA
PMO002464	f_capperfiber	0.304971	-0.580333	FALSE	none	NA
PMO002465	f_capperfiber	0.0995678	0.805957	FALSE	none	NA
PMO002467	f_capperfiber	0.627789	-0.296748	FALSE	none	NA
PMO002468	f_capperfiber	0.39752	0.4941	FALSE	none	NA
PMO002469	f_capperfiber	0.255782	-0.628846	FALSE	none	NA
PMO002470	f_capperfiber	0.35787	-0.530363	FALSE	none	NA
PMO002471	f_capperfiber	0.1839	-0.704657	FALSE	none	NA
PMO002472	f_capperfiber	0.078252	-0.835261	FALSE	none	NA
PMO002473	f_capperfiber	0.319625	-0.566286	FALSE	none	NA
PMO002474	f_capperfiber	0.502917	0.40147	FALSE	none	NA
PMO002476	f_capperfiber	0.318504	-0.567355	FALSE	none	NA
PMO002477	f_capperfiber	0.0184076	-0.937889	TRUE	N	re
PMO002478	f_capperfiber	0.804736	-0.15397	FALSE	none	NA
PMO002479	f_capperfiber	0.46725	-0.43229	FALSE	none	NA
PMO002480	f_capperfiber	0.253508	-0.631146	FALSE	none	NA
PMO002481	f_capperfiber	0.137155	0.75854	FALSE	none	NA
PMO002482	f_capperfiber	0.207566	-0.678913	FALSE	none	NA
PMO002483	f_capperfiber	0.346655	-0.540794	FALSE	none	NA
PMO002484	f_capperfiber	0.492513	-0.410411	FALSE	none	NA
PMO002486	f_capperfiber	0.129133	-0.768294	FALSE	none	NA
PMO002487	f_capperfiber	0.884151	-0.0911139	FALSE	none	NA
PMO002489	f_capperfiber	0.908106	0.0722363	FALSE	none	NA
PMO002490	f_capperfiber	0.680467	-0.253709	FALSE	none	NA
PMO002491	f_capperfiber	0.457784	0.440553	FALSE	none	NA
PMO002492	f_capperfiber	0.352755	-0.535111	FALSE	none	NA
PMO002495	f_capperfiber	0.430172	-0.464875	FALSE	none	NA
PMO002496	f_capperfiber	0.217269	-0.6686	FALSE	none	NA
PMO002497	f_capperfiber	0.733725	0.210701	FALSE	none	NA
PMO002498	f_capperfiber	0.293436	-0.591513	FALSE	none	NA
PMO002501	f_capperfiber	0.686358	-0.248929	FALSE	none	NA
PMO002504	f_capperfiber	0.0852968	-0.825332	FALSE	none	NA
PMO002507	f_capperfiber	0.370201	-0.518987	FALSE	none	NA
PMO002508	f_capperfiber	0.23	0.65526	FALSE	none	NA
PMO002509	f_capperfiber	0.123659	-0.775054	FALSE	none	NA
PMO002510	f_capperfiber	0.27639	-0.608247	FALSE	none	NA
PMO002511	f_capperfiber	0.285433	-0.599336	FALSE	none	NA
PMO002512	f_capperfiber	0.114877	-0.786088	FALSE	none	NA
PMO002514	f_capperfiber	0.238802	-0.646156	FALSE	none	NA
PMO002516	f_capperfiber	0.207835	-0.678626	FALSE	none	NA
PMO002517	f_capperfiber	0.298686	-0.586411	FALSE	none	NA
PMO002519	f_capperfiber	0.456323	-0.441832	FALSE	none	NA
PMO002520	f_capperfiber	0.111775	-0.790046	FALSE	none	NA
PMO002521	f_capperfiber	0.447465	-0.449604	FALSE	none	NA
PMO002522	f_capperfiber	0.616558	-0.305999	FALSE	none	NA
PMO002523	f_capperfiber	0.863014	0.107798	FALSE	none	NA
PMO002524	f_capperfiber	0.197157	-0.690128	FALSE	none	NA
PMO002526	f_capperfiber	0.457008	-0.441232	FALSE	none	NA
PMO002527	f_capperfiber	0.713301	-0.227141	FALSE	none	NA
PMO002528	f_capperfiber	0.24132	-0.643568	FALSE	none	NA
PMO002529	f_capperfiber	0.720417	-0.221407	FALSE	none	NA
PMO002530	f_capperfiber	0.408525	-0.484191	FALSE	none	NA
PMO002531	f_capperfiber	0.38957	-0.501299	FALSE	none	NA
PMO002532	f_capperfiber	0.167424	-0.723137	FALSE	none	NA
PMO002534	f_capperfiber	0.297755	-0.587314	FALSE	none	NA
PMO002535	f_capperfiber	0.255017	-0.629619	FALSE	none	NA
PMO002538	f_capperfiber	0.357895	-0.53034	FALSE	none	NA
PMO002539	f_capperfiber	0.342807	0.544391	FALSE	none	NA
PMO002541	f_capperfiber	0.0183689	0.937977	TRUE	P	re
PMO002542	f_capperfiber	0.10098	-0.804087	FALSE	none	NA
PMO002544	f_capperfiber	0.254574	0.630067	FALSE	none	NA
PMO002545	f_capperfiber	0.420948	-0.473078	FALSE	none	NA
PMO002547	f_capperfiber	0.750786	-0.197014	FALSE	none	NA
PMO002548	f_capperfiber	0.34651	-0.540929	FALSE	none	NA
PMO002549	f_capperfiber	0.726944	0.216153	FALSE	none	NA
PMO002550	f_capperfiber	0.178413	-0.710756	FALSE	none	NA
PMO002551	f_capperfiber	0.237333	0.64767	FALSE	none	NA
PMO002552	f_capperfiber	0.498908	-0.40491	FALSE	none	NA
PMO002553	f_capperfiber	0.889836	0.0866313	FALSE	none	NA
PMO002554	f_capperfiber	0.377817	0.512007	FALSE	none	NA
PMO002555	f_capperfiber	0.207634	0.67884	FALSE	none	NA
PMO002557	f_capperfiber	0.197585	-0.689663	FALSE	none	NA
PMO002558	f_capperfiber	0.382115	-0.508082	FALSE	none	NA
PMO002559	f_capperfiber	0.883225	0.091844	FALSE	none	NA
PMO002560	f_capperfiber	0.3718	-0.517519	FALSE	none	NA
PMO002562	f_capperfiber	0.638895	-0.287628	FALSE	none	NA
PMO002563	f_capperfiber	0.296622	-0.588413	FALSE	none	NA
PMO002564	f_capperfiber	0.311073	-0.574463	FALSE	none	NA
PMO002565	f_capperfiber	0.996269	0.00293032	FALSE	none	NA
PMO002566	f_capperfiber	0.39811	-0.493567	FALSE	none	NA
PMO002567	f_capperfiber	0.755821	-0.192982	FALSE	none	NA
PMO002568	f_capperfiber	0.728592	-0.214827	FALSE	none	NA
PMO002569	f_capperfiber	0.520168	-0.386727	FALSE	none	NA
PMO002570	f_capperfiber	0.39207	-0.499032	FALSE	none	NA
PMO002571	f_capperfiber	0.400501	0.49141	FALSE	none	NA
PMO002572	f_capperfiber	0.133594	-0.762848	FALSE	none	NA
PMO002573	f_capperfiber	0.226649	0.658752	FALSE	none	NA
PMO002574	f_capperfiber	0.867104	-0.104567	FALSE	none	NA
PMO002575	f_capperfiber	0.577549	-0.338364	FALSE	none	NA
PMO002576	f_capperfiber	0.455337	-0.442695	FALSE	none	NA
PMO002578	f_capperfiber	0.308183	-0.57724	FALSE	none	NA
PMO002579	f_capperfiber	0.312804	-0.572803	FALSE	none	NA
PMO002580	f_capperfiber	0.679418	-0.254561	FALSE	none	NA
PMO002581	f_capperfiber	0.64067	-0.286173	FALSE	none	NA
PMO002583	f_capperfiber	0.398394	0.493311	FALSE	none	NA
PMO002584	f_capperfiber	0.480715	-0.420598	FALSE	none	NA
PMO002585	f_capperfiber	0.634563	0.291182	FALSE	none	NA
PMO002587	f_capperfiber	0.663539	-0.26748	FALSE	none	NA
PMO002588	f_capperfiber	0.227422	-0.657945	FALSE	none	NA
PMO002589	f_capperfiber	0.360889	-0.527569	FALSE	none	NA
PMO002590	f_capperfiber	0.0129851	0.950846	TRUE	P	ri
PMO002591	f_capperfiber	0.103208	-0.801154	FALSE	none	NA
PMO002592	f_capperfiber	0.0506496	-0.877274	FALSE	none	NA
PMO002593	f_capperfiber	0.621776	-0.301698	FALSE	none	NA
PMO002594	f_capperfiber	0.541526	0.368611	FALSE	none	NA
PMO002595	f_capperfiber	0.899755	0.0788138	FALSE	none	NA
PMO002596	f_capperfiber	0.116583	0.783926	FALSE	none	NA
PMO002597	f_capperfiber	0.305497	0.579826	FALSE	none	NA
PMO002599	f_capperfiber	0.695852	-0.241238	FALSE	none	NA
PMO002600	f_capperfiber	0.412077	-0.481005	FALSE	none	NA
PMO002601	f_capperfiber	0.032434	0.909124	TRUE	P	NA
PMO002603	f_capperfiber	0.264021	-0.620559	FALSE	none	NA
PMO002604	f_capperfiber	0.553606	-0.358427	FALSE	none	NA
PMO002606	f_capperfiber	0.428712	0.466171	FALSE	none	NA
PMO002607	f_capperfiber	0.352359	0.535478	FALSE	none	NA
PMO002611	f_capperfiber	0.562163	-0.351238	FALSE	none	NA
PMO002612	f_capperfiber	0.276345	-0.608291	FALSE	none	NA
PMO002613	f_capperfiber	0.675664	-0.257611	FALSE	none	NA
PMO002614	f_capperfiber	0.749821	0.197788	FALSE	none	NA
PMO002616	f_capperfiber	0.255788	-0.62884	FALSE	none	NA
PMO002617	f_capperfiber	0.864234	-0.106834	FALSE	none	NA
PMO002618	f_capperfiber	0.153717	-0.738915	FALSE	none	NA
PMO002619	f_capperfiber	0.317494	-0.568319	FALSE	none	NA
PMO002620	f_capperfiber	0.15235	-0.74051	FALSE	none	NA
PMO002621	f_capperfiber	0.0267822	-0.920104	TRUE	N	re
PMO002622	f_capperfiber	0.520996	-0.386023	FALSE	none	NA
PMO002623	f_capperfiber	0.70977	-0.22999	FALSE	none	NA
PMO002625	f_capperfiber	0.288612	-0.596222	FALSE	none	NA
PMO002626	f_capperfiber	0.13627	-0.759607	FALSE	none	NA
PMO002627	f_capperfiber	0.302562	-0.582659	FALSE	none	NA
PMO002628	f_capperfiber	0.122733	-0.776207	FALSE	none	NA
PMO002629	f_capperfiber	0.320135	-0.5658	FALSE	none	NA
PMO002630	f_capperfiber	0.260567	-0.624025	FALSE	none	NA
PMO002631	f_capperfiber	0.330267	-0.556188	FALSE	none	NA
PMO002633	f_capperfiber	0.174622	-0.715002	FALSE	none	NA
PMO002636	f_capperfiber	0.545358	-0.365376	FALSE	none	NA
PMO002637	f_capperfiber	0.063021	-0.857736	FALSE	none	NA
PMO002638	f_capperfiber	0.000606443	-0.993653	TRUE	N	ri
PMO002639	f_capperfiber	0.579363	-0.336851	FALSE	none	NA
PMO002640	f_capperfiber	0.636911	0.289256	FALSE	none	NA
PMO002641	f_capperfiber	0.1621	0.729219	FALSE	none	NA
PMO002642	f_capperfiber	0.0935035	-0.814079	FALSE	none	NA
PMO002643	f_capperfiber	0.341593	-0.545529	FALSE	none	NA
PMO002644	f_capperfiber	0.466594	-0.432861	FALSE	none	NA
PMO002645	f_capperfiber	0.38125	-0.50887	FALSE	none	NA
PMO002647	f_capperfiber	0.934086	-0.0517921	FALSE	none	NA
PMO002650	f_capperfiber	0.907327	-0.0728501	FALSE	none	NA
PMO002651	f_capperfiber	0.352849	-0.535023	FALSE	none	NA
PMO002653	f_capperfiber	0.276921	-0.607721	FALSE	none	NA
PMO002654	f_capperfiber	0.235572	-0.649486	FALSE	none	NA
PMO002655	f_capperfiber	0.502092	-0.402177	FALSE	none	NA
PMO002657	f_capperfiber	0.810085	0.14972	FALSE	none	NA
PMO002659	f_capperfiber	0.269231	-0.615355	FALSE	none	NA
PMO002660	f_capperfiber	0.135156	-0.760955	FALSE	none	NA
PMO002662	f_capperfiber	0.413525	-0.479708	FALSE	none	NA
PMO002663	f_capperfiber	0.250958	0.633731	FALSE	none	NA
PMO002664	f_capperfiber	0.323979	-0.562144	FALSE	none	NA
PMO002665	f_capperfiber	0.357237	-0.53095	FALSE	none	NA
PMO002666	f_capperfiber	0.445211	-0.451587	FALSE	none	NA
PMO002667	f_capperfiber	0.935657	0.0505561	FALSE	none	NA
PMO002668	f_capperfiber	0.997156	0.0022337	FALSE	none	NA
PMO002669	f_capperfiber	0.559691	-0.353313	FALSE	none	NA
PMO002671	f_capperfiber	0.681756	-0.252663	FALSE	none	NA
PMO002673	f_capperfiber	0.249813	-0.634894	FALSE	none	NA
PMO002674	f_capperfiber	0.335177	-0.551556	FALSE	none	NA
PMO002675	f_capperfiber	0.269205	-0.61538	FALSE	none	NA
PMO002677	f_capperfiber	0.314763	-0.570928	FALSE	none	NA
PMO002678	f_capperfiber	0.420897	-0.473123	FALSE	none	NA
PMO002679	f_capperfiber	0.418155	-0.475569	FALSE	none	NA
PMO002682	f_capperfiber	0.803001	0.15535	FALSE	none	NA
PMO002683	f_capperfiber	0.311308	-0.574238	FALSE	none	NA
PMO002684	f_capperfiber	0.508339	-0.396826	FALSE	none	NA
PMO002685	f_capperfiber	0.4628	-0.43617	FALSE	none	NA
PMO002686	f_capperfiber	0.361996	-0.526546	FALSE	none	NA
PMO002689	f_capperfiber	0.43638	-0.459377	FALSE	none	NA
PMO002690	f_capperfiber	0.387394	-0.503276	FALSE	none	NA
PMO002692	f_capperfiber	0.0512575	-0.876282	FALSE	none	NA
PMO002693	f_capperfiber	0.496156	-0.407275	FALSE	none	NA
PMO002694	f_capperfiber	0.116134	-0.784495	FALSE	none	NA
PMO002695	f_capperfiber	0.190361	-0.69754	FALSE	none	NA
PMO002696	f_capperfiber	0.206364	-0.6802	FALSE	none	NA
PMO002697	f_capperfiber	0.496564	0.406925	FALSE	none	NA
PMO002699	f_capperfiber	0.241516	-0.643368	FALSE	none	NA
PMO002700	f_capperfiber	0.164993	-0.725907	FALSE	none	NA
PMO002702	f_capperfiber	0.323836	-0.56228	FALSE	none	NA
PMO002703	f_capperfiber	0.0765785	-0.837659	FALSE	none	NA
PMO002704	f_capperfiber	0.327932	-0.558396	FALSE	none	NA
PMO002705	f_capperfiber	0.304882	-0.580419	FALSE	none	NA
PMO002706	f_capperfiber	0.29633	-0.588698	FALSE	none	NA
PMO002708	f_capperfiber	0.0160224	-0.94341	TRUE	N	re
PMO002709	f_capperfiber	0.417525	-0.476132	FALSE	none	NA
PMO002710	f_capperfiber	0.386681	-0.503924	FALSE	none	NA
PMO002711	f_capperfiber	0.215979	-0.669964	FALSE	none	NA
PMO002712	f_capperfiber	0.478752	-0.422298	FALSE	none	NA
PMO002713	f_capperfiber	0.207048	-0.679468	FALSE	none	NA
PMO002714	f_capperfiber	0.219979	-0.665743	FALSE	none	NA
PMO002717	f_capperfiber	0.185047	-0.703388	FALSE	none	NA
PMO002718	f_capperfiber	0.960583	-0.0309629	FALSE	none	NA
PMO002720	f_capperfiber	0.0936101	-0.813935	FALSE	none	NA
PMO002721	f_capperfiber	0.232049	-0.653133	FALSE	none	NA
PMO002722	f_capperfiber	0.0457134	0.885481	TRUE	P	ri
PMO002723	f_capperfiber	0.29878	-0.58632	FALSE	none	NA
PMO002724	f_capperfiber	0.327582	-0.558727	FALSE	none	NA
PMO002725	f_capperfiber	0.756318	-0.192584	FALSE	none	NA
PMO002726	f_capperfiber	0.611847	-0.309889	FALSE	none	NA
PMO002730	f_capperfiber	0.201139	-0.685819	FALSE	none	NA
PMO002731	f_capperfiber	0.174834	-0.714764	FALSE	none	NA
PMO002732	f_capperfiber	0.497341	-0.406257	FALSE	none	NA
PMO002733	f_capperfiber	0.641253	0.285695	FALSE	none	NA
PMO002735	f_capperfiber	0.313147	-0.572475	FALSE	none	NA
PMO002736	f_capperfiber	0.298096	-0.586983	FALSE	none	NA
PMO002741	f_capperfiber	0.00818085	-0.963924	TRUE	N	re
PMO002742	f_capperfiber	0.110714	0.791408	FALSE	none	NA
PMO002743	f_capperfiber	0.850383	0.117782	FALSE	none	NA
PMO002744	f_capperfiber	0.343137	0.544082	FALSE	none	NA
PMO002745	f_capperfiber	0.0609055	0.860985	FALSE	none	NA
PMO002746	f_capperfiber	0.20265	0.684189	FALSE	none	NA
PMO002747	f_capperfiber	0.398729	-0.493009	FALSE	none	NA
PMO002748	f_capperfiber	0.356565	0.531573	FALSE	none	NA
[truncated: 64,277 more rows]

## Sheet: Figure 3D
group1	group	reinforce	reverse	all
2	flight_corpheno	5	88	93
4	heart_corpheno	14	46	60
2	flight_corpheno_raw	48	198	246
4	heart_corpheno_raw	166	186	352

## Sheet: Figure 3E
Cutoff	Gene number
0.5_flight_reinforce	26
1_flight_reinforce	3
1.5_flight_reinforce	7
2_flight_reinforce	12
0.5_flight_reverse	106
1_flight_reverse	19
1.5_flight_reverse	14
2_flight_reverse	59

## Sheet: Figure 3F
Cutoff	Gene number
0.5_heart_reinforce	58
1_heart_reinforce	30
1.5_heart_reinforce	14
2_heart_reinforce	64
0.5_heart_reverse	81
1_heart_reverse	16
1.5_heart_reverse	7
2_heart_reverse	82
