# Supplementary material for: Gene expression plasticity followed by genetic change during colonization in a high-elevation environment
Source: eLife. 2024 Mar 12;12:RP86687. doi: 10.7554/eLife.86687 (PMC10932543; doi:10.7554/eLife.86687)
Supplement: Supplementary file 1. — All birds collected were adults and at pre-breeding season. Sex was unknown. [file elife-86687-supp1.xlsx]

## Sheet: Sheet1
Supplementary Table S1. Sampling of transcriptomic data used in this study. All birds collected were adults and at pre-breeding season. Sex was unknown.
Tissue	Groups	Individual ID	Sampling locality	Clean reads	Mapped reads	Percent mapped to genome (%)
Flight muscle	Ancestral Stage	BJ_1	Beijing	17166225	15504534	0.9032
	Ancestral Stage	BJ_2	Beijing	20441592	18002910	0.8807
	Ancestral Stage	BJ_3	Beijing	16679631	14457904	0.8668
	Ancestral Stage	BJ_4	Beijing	20923512	17881233	0.8546
	Colonized stage	QH_1	Qinghai Lake	16690586	14589241	0.8741
	Colonized stage	QH_2	Qinghai Lake	17278802	15141414	0.8763
	Colonized stage	QH_3	Qinghai Lake	16849769	14802522	0.8785
	Colonized stage	QH_4	Qinghai Lake	17144248	14857205	0.8666
	Plastic stage	Hypoxia_1	Beijing	16937478	14754237	0.8711
	Plastic stage	Hypoxia_2	Beijing	18632409	16465460	0.8837
	Plastic stage	Hypoxia_3	Beijing	20693777	18202246	0.8796
	Plastic stage	Hypoxia_4	Beijing	20686863	17995502	0.8699
Cardiac muscle	Ancestral stage	BJ_1	Beijing	21447101	19109367	0.891
	Ancestral stage	BJ_2	Beijing	17223560	15299688	0.8883
	Ancestral stage	BJ_3	Beijing	20244087	17636649	0.8712
	Colonized stage	QH_1	Qinghai Lake	17350254	15256078	0.8793
	Colonized stage	QH_2	Qinghai Lake	17116185	15087917	0.8815
	Colonized stage	QH_3	Qinghai Lake	17288719	15504523	0.8968
	Plastic stage	Hypoxia_1	Beijing	17120796	14960152	0.8738
	Plastic stage	Hypoxia_2	Beijing	16697228	14757010	0.8838
	Plastic stage	Hypoxia_3	Beijing	16859063	15166413	0.8996
