# Supplementary material for: Gene expression plasticity followed by genetic change during colonization in a high-elevation environment
Source: eLife. 2024 Mar 12;12:RP86687. doi: 10.7554/eLife.86687 (PMC10932543; doi:10.7554/eLife.86687)
Supplement: Supplementary file 2. — All birds collected were adults and sex is unknown. [file elife-86687-supp2.xlsx]

## Sheet: Sheet1
Supplementary Table 2. Statistics of reads mapping and coverage of 11 highland and 12 lowland tree sparrows (Qu et al. 2020).All birds collected were adults and sex is unknown.
Group	Sample	Location	Collection time	Longitude	Latitude	Elevation	Clean reads (G)	Coverage	Mapping rate (%)
Highland	IOZ14015	Gangcha	2014-04-10	99.74	N37.03	3213m	17.94	15.4	98.8
	IOZ14018	Gangcha	2014-04-11	E99.74	N37.03	3213m	15.52	13.15	98.55
	IOZ14019	Gangcha	2014-04-11	E99.74	N37.03	3213m	18.13	15.34	98.75
	IOZ14020	Gangcha	2014-04-11	E99.74	N37.03	3213m	18.24	15.66	98.77
	IOZ14021	Gangcha	2014-04-11	E99.74	N37.03	3213m	18.24	15.66	98.77
	IOZ6498	Qinghai lake	2008-02-26	E99.47	N36.59	3200m	16.45	14	98.8
	IOZ6499	Qinghai lake	2008-02-26	E99.47	N36.59	3200m	14.19	12.07	98.79
	IOZ6500	Qinghai lake	2008-02-26	E99.47	N36.59	3200m	14.72	12.5	98.86
	IOZ6501	Qinghai lake	2008-02-26	E99.47	N36.59	3200m	16.85	14.27	98.66
	IOZ6502	Qinghai lake	2008-02-26	E99.47	N36.59	3200m	18.89	16.03	98.75
	IOZ6503	Qinghai lakemahe	2008-02-26	E99.47	N36.59	3200m	23.13	19.51	98.86
Lowland	IOZ4735	Qinghuangdao	2010-11-06	E119.35	N39.56	100m	21.79	18.59	98.79
	IOZ4736	Qinghuangdao	2010-11-06	E119.35	N39.56	100m	20.83	17.81	98.93
	IOZ4737	Qinghuangdao	2010-11-06	E119.35	N39.56	100m	19.86	16.75	98.86
	IOZ4738	Qinghuangdao	2010-11-06	E119.35	N39.56	100m	22.32	19.01	94.66
	IOZ4739	Qinghuangdao	2010-11-06	E119.35	N39.56	100m	20.13	17.08	98.9
	IOZ4740	Qinghuangdao	2010-11-06	E119.35	N39.56	100m	28.55	24.24	98.76
	IOZ14001	Bejing	2014-03-24	E116.35	N39.93	59m	19.15	16.16	98.77
	IOZ14002	Bejing	2014-03-24	E116.35	N39.93	59m	20.32	17.27	98.8
	IOZ14003	Bejing	2014-03-24	E116.35	N39.93	59m	20.75	17.74	98.73
	IOZ14004	Bejing	2014-03-24	E116.35	N39.93	59m	28.88	24.31	98.76
	IOZ14006	Tianjin	Unknown	E117.10	N39.10	70m	19.71	16.65	98.67
	IOZ18809	Tianjin	Unknown	E117.10	N39.10		33.53	28.44	98.72
